# Supplementary material
Source: PubMed Central journal article supplement (PMC3684008)
Supplement: NIHMS467321-supplement-1_si_001.pdf [file NIHMS467321-supplement-1_si_001.pdf]

# **Supporting Information for:**

## **Structural Refinement from Restrained-Ensemble**

### **Simulations Based on EPR/DEER Data:**

#### **Application to T4 Lysozyme**

*Shahidul M. Islam,<sup>1</sup> Richard Stein,<sup>2</sup> Hassane Mchaourab<sup>2</sup> and Benoit Roux<sup>1,\*</sup>*

<sup>1</sup>Department of Biochemistry and Molecular Biology, University of Chicago,  
Chicago, IL, USA 60637

<sup>2</sup>Department of Molecular Physiology and Biophysics,  
Vanderbilt University, Nashville, TN 37232

\*corresponding author E-mail: roux@uchicago.edu

**Table S1.** T4L double mutants

| Site1                                                                                                                                                  | Site2 | Source | Site1 | Site2 | Source | Site1 | Site2 | Source | Site1 | Site2 | Source |
|--------------------------------------------------------------------------------------------------------------------------------------------------------|-------|--------|-------|-------|--------|-------|-------|--------|-------|-------|--------|
| 59                                                                                                                                                     | 159   | C      | 65    | 135   | A      | 82    | 132   | C      | 94    | 132   | C      |
| 60                                                                                                                                                     | 90    | C      | 72    | 119   | E      | 82    | 134   | D      | 108   | 123   | D      |
| 60                                                                                                                                                     | 94    | C      | 72    | 131   | E      | 82    | 155   | C      | 108   | 134   | D      |
| 60                                                                                                                                                     | 109   | C      | 72    | 151   | E      | 83    | 155   | D      | 108   | 155   | C      |
| 60                                                                                                                                                     | 154   | C      | 75    | 119   | E      | 85    | 119   | E      | 109   | 134   | C      |
| 61                                                                                                                                                     | 128   | D      | 75    | 131   | E      | 85    | 131   | E      | 115   | 155   | C      |
| 61                                                                                                                                                     | 135   | A      | 75    | 151   | E      | 85    | 151   | E      | 116   | 134   | C      |
| 62                                                                                                                                                     | 109   | D      | 76    | 119   | E      | 93    | 108   | D      | 119   | 128   | B      |
| 62                                                                                                                                                     | 123   | D      | 76    | 131   | E      | 93    | 112   | C      | 119   | 131   | B      |
| 62                                                                                                                                                     | 134   | C      | 76    | 151   | E      | 93    | 123   | C      | 123   | 131   | B      |
| 62                                                                                                                                                     | 155   | D      | 79    | 119   | E      | 93    | 134   | D      | 128   | 155   | D      |
| 64                                                                                                                                                     | 122   | C      | 79    | 131   | E      | 93    | 154   | C      | 140   | 151   | B      |
| 65                                                                                                                                                     | 76    | A      | 82    | 94    | C      | 94    | 123   | D      |       |       |        |
| A: Borbat, 2002 <sup>1</sup><br>B: Alexander, 2008 <sup>2</sup><br>C: Kazmier, 2011 <sup>3</sup><br>D: to be described elsewhere<br>E: current mutants |       |        |       |       |        |       |       |        |       |       |        |

**Figure S1.** Conventional unrestrained MD Simulation set up for 37 spin labeled T4 Lysozymes. Spin-labels are far from each other so that they do not interact with each other. The distance between the center of mass of each T4L is  $80\text{\AA}$  from each other; thereby, they are far enough to cause any interaction. Similarly, the spin-label side chains were also kept at least four residues apart with a distance of about  $10\text{-}15\text{\AA}$  from each other; therefore, the interaction between the spin-labels are also minimum.

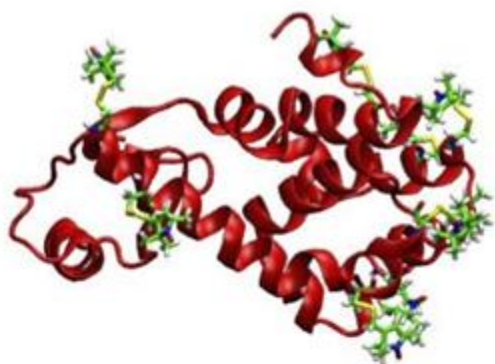

**A**

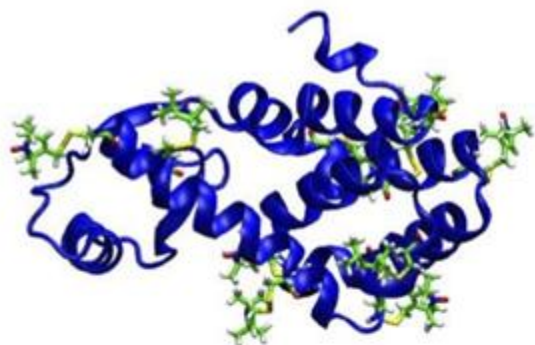

**B**

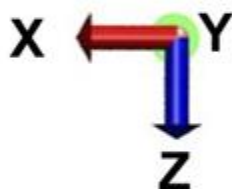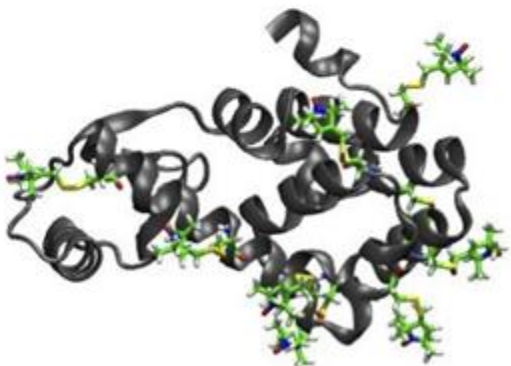

**C**

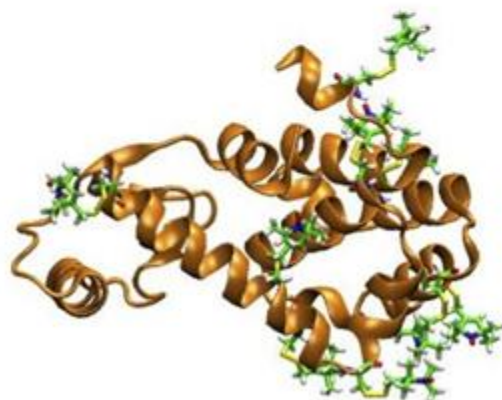

**D**

**Figure S2.** The T4L system is solvated by TIP3P waters in a rectangular box for MD and LES simulation.

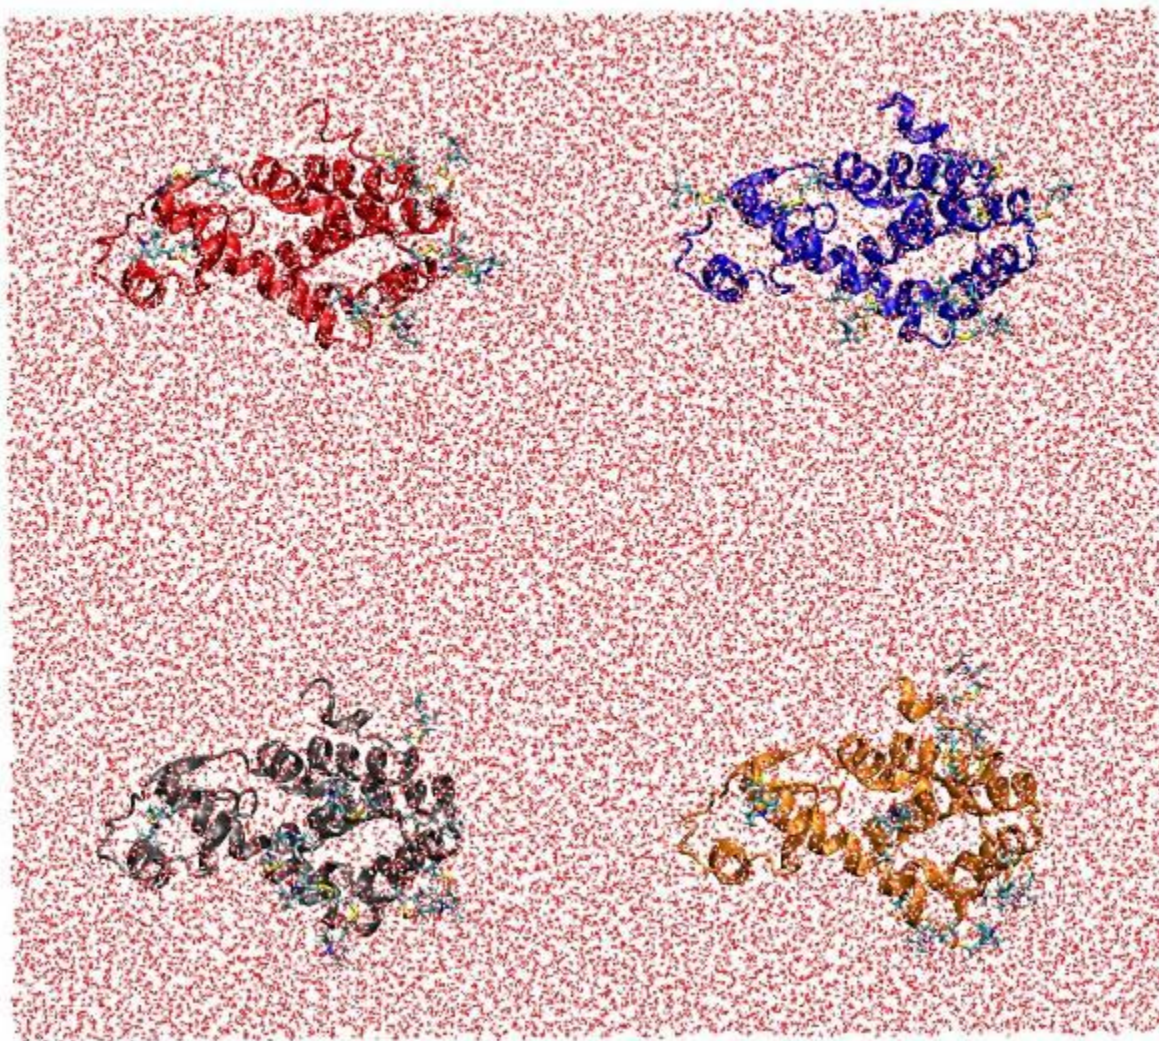



**Figure S3.** Simulation set up in RE simulation. The number of water molecules from the MD and LES simulation box is reduced from 41547 to 19479 by keeping only the waters that are within  $35\text{\AA}$  from the center of mass of each T4L systems.

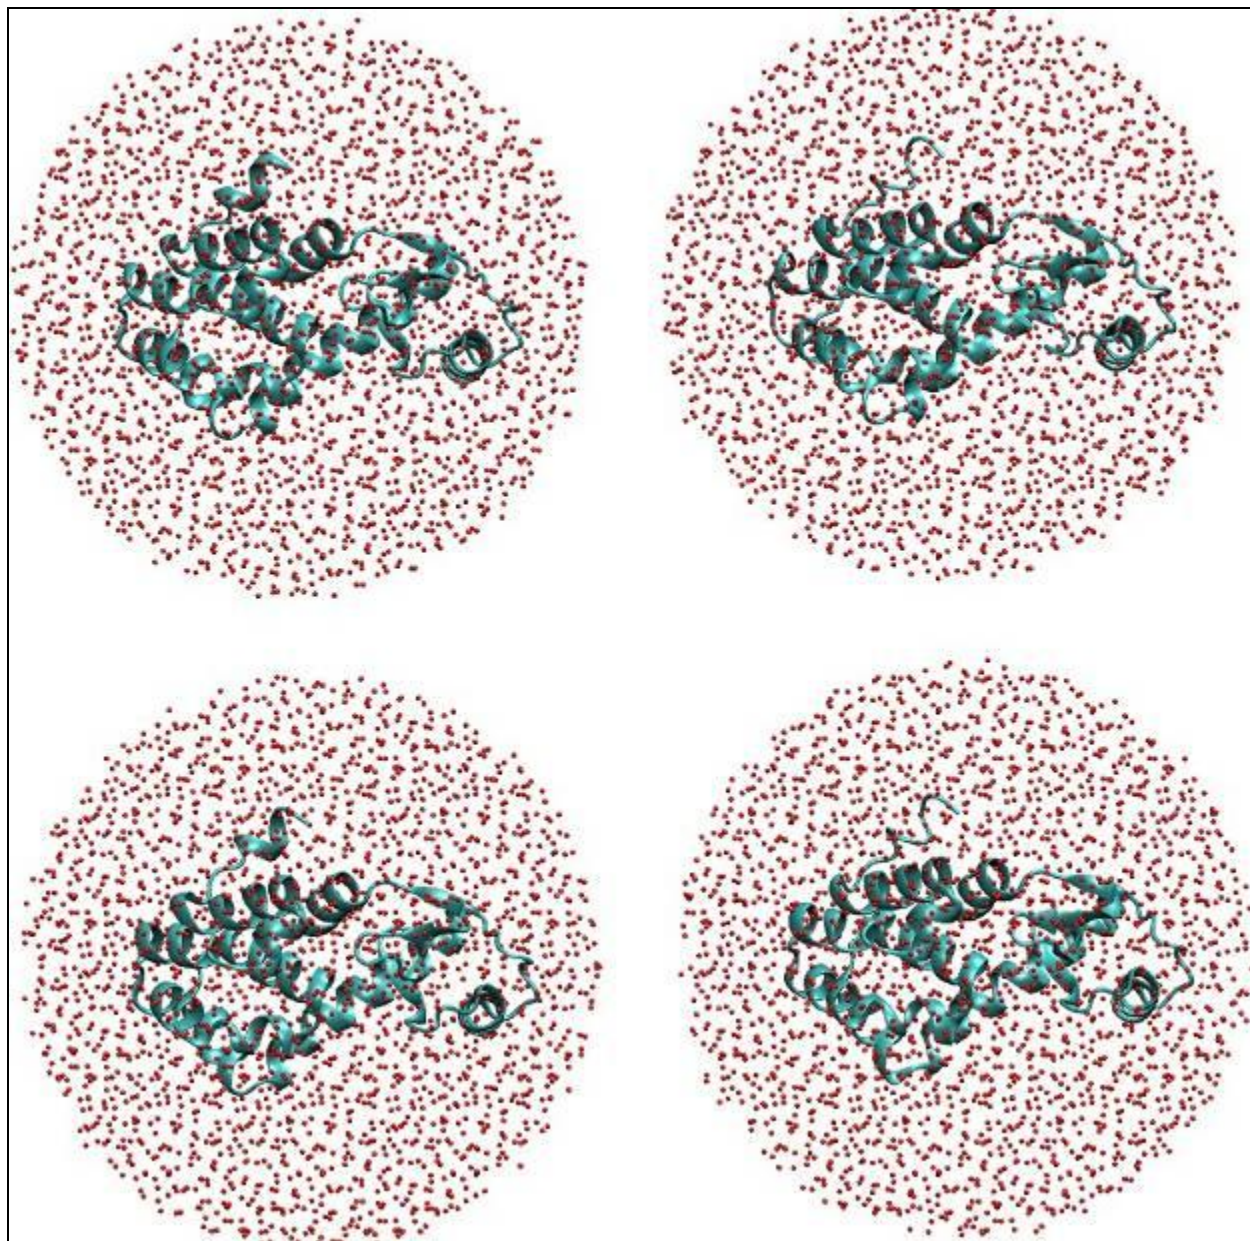

**Figure S4.** Energy plots for the restrained ensemble simulation, divided into total (*black*), kinetic (*red*) and potential (*green*) energies.

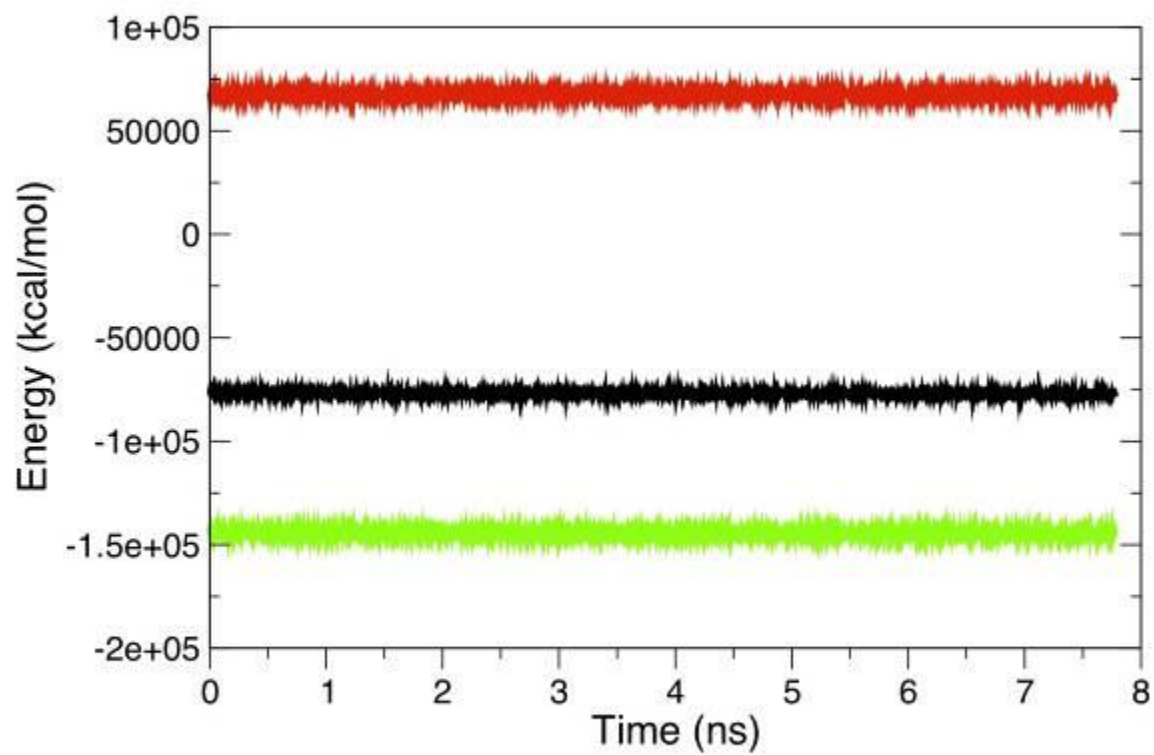

**Figure S5.** Temperature vs. time plot in restrained ensemble simulation. Temperatures of the replica atoms were also kept at 300K.

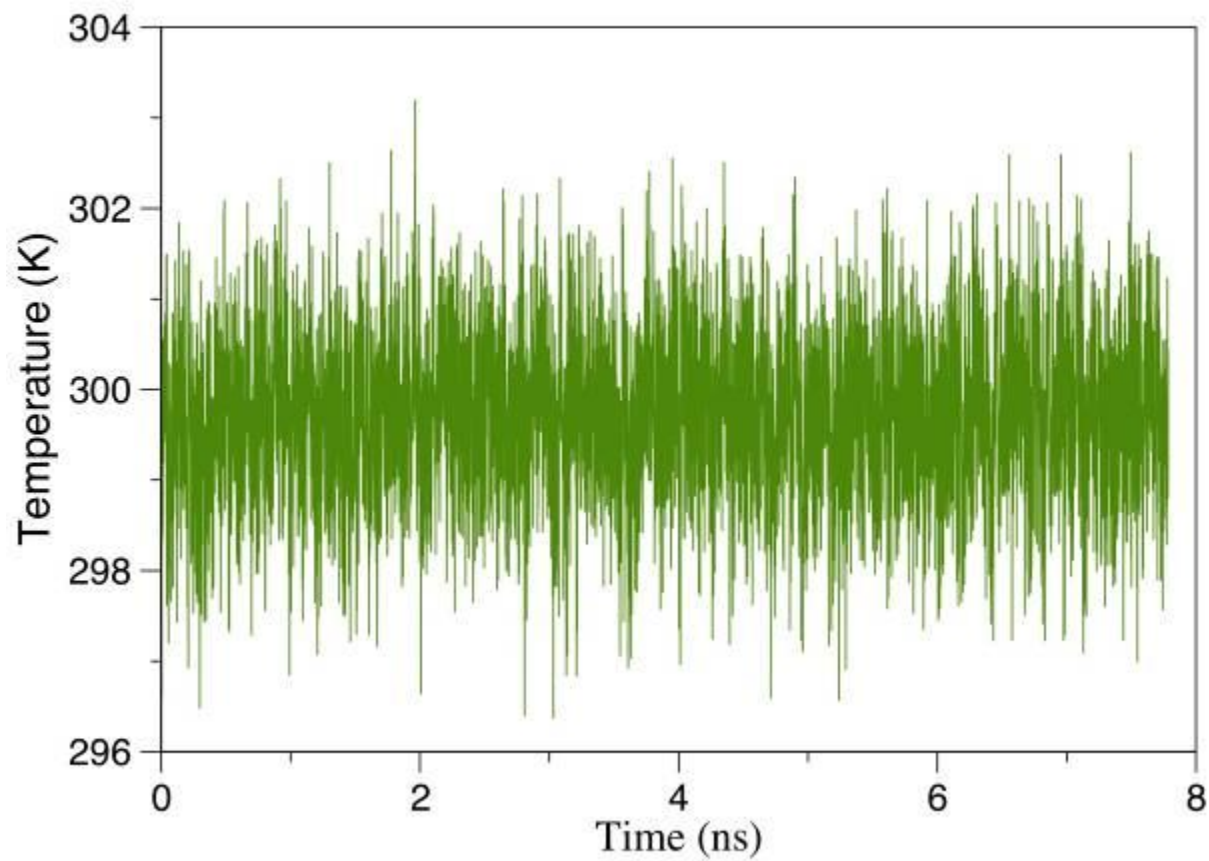

**Figure S6.** Comparison of the spin-spin distance histograms obtained from conventional molecular dynamics (red line), locally enhanced sampling (blue line), restrained ensemble simulation (green line) and experiment (black line).

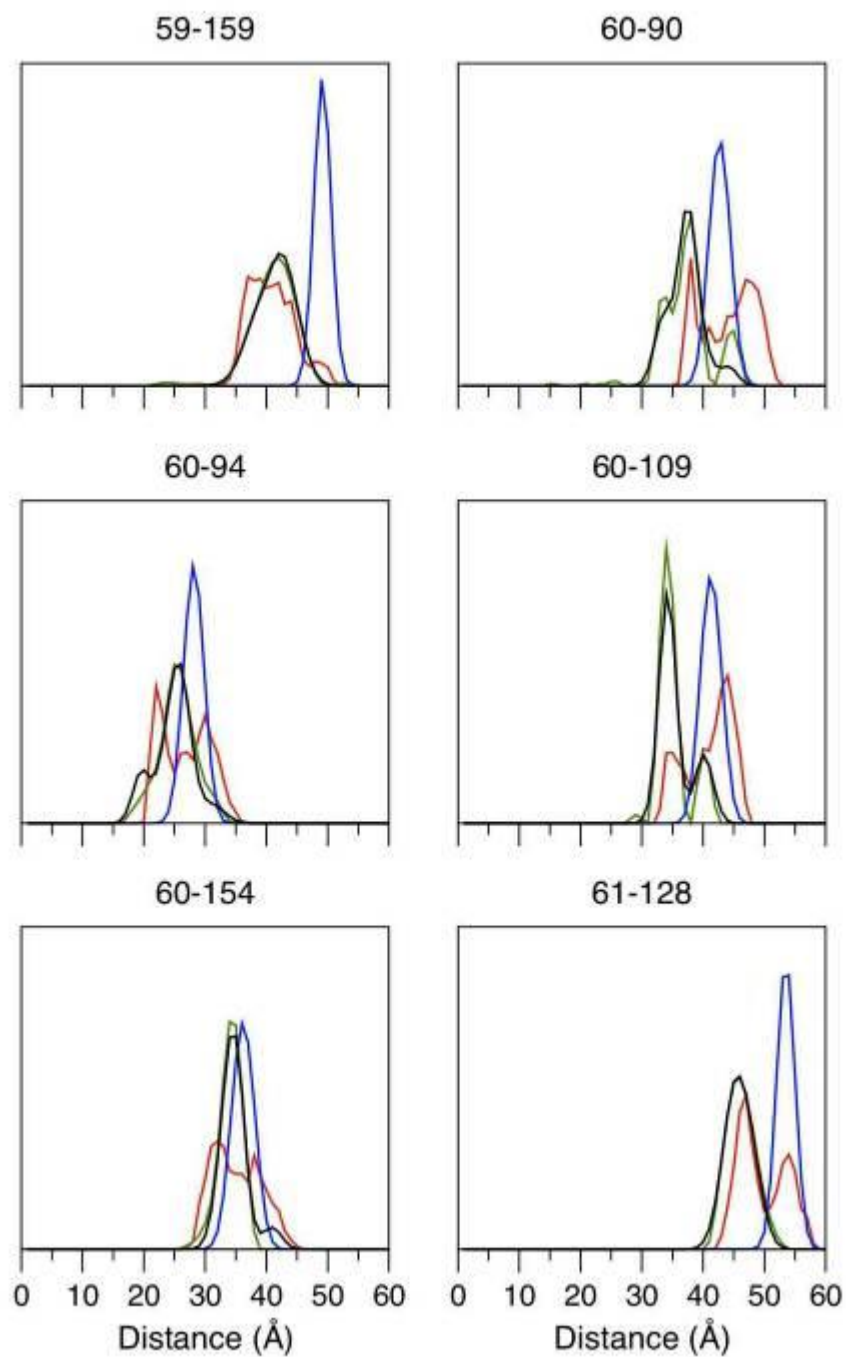



61-135

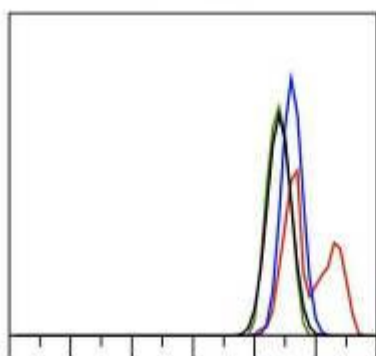

62-109

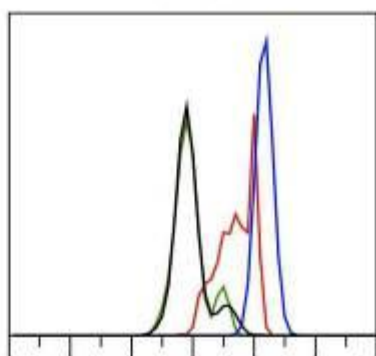

62-123

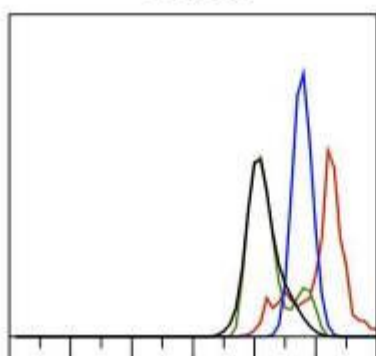

62-134

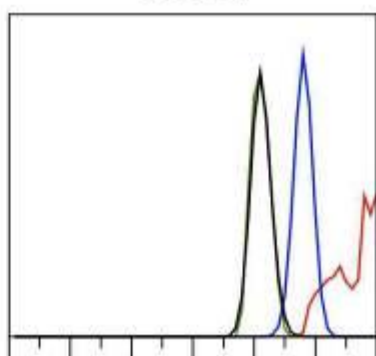

62-155

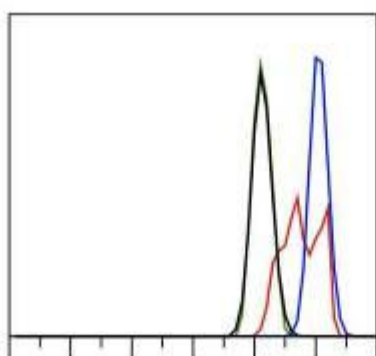

64-122

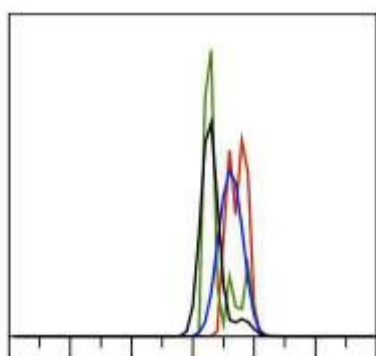

0 10 20 30 40 50 60  
Distance (Å)

0 10 20 30 40 50 60  
Distance (Å)

65-76

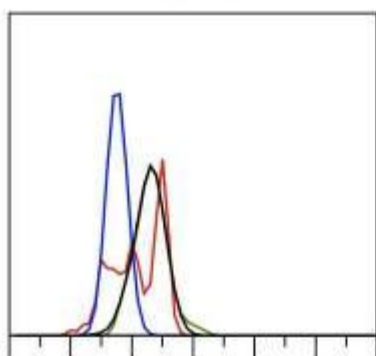

65-135

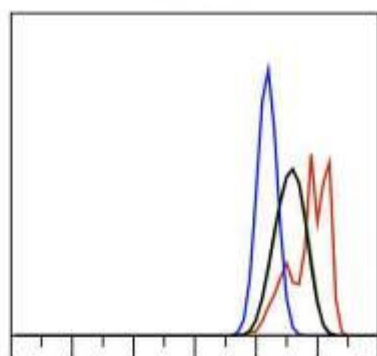

72-119

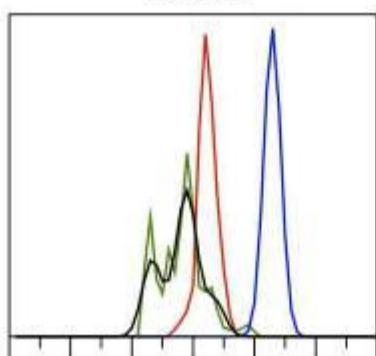

72-131

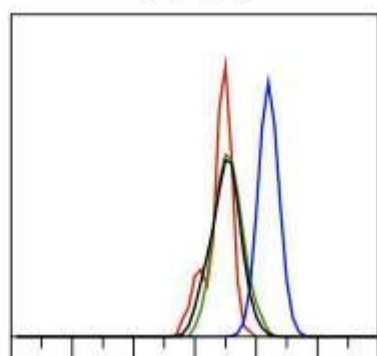

72-151

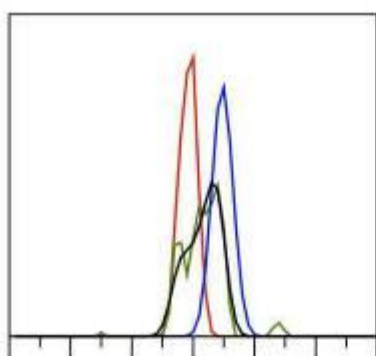

75-119

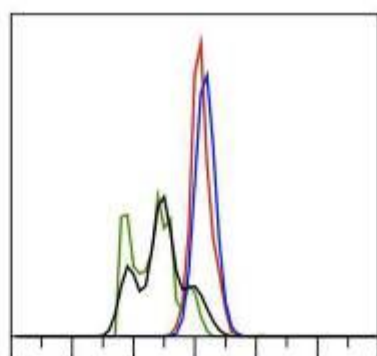

0 10 20 30 40 50 60  
Distance (Å)

0 10 20 30 40 50 60  
Distance (Å)

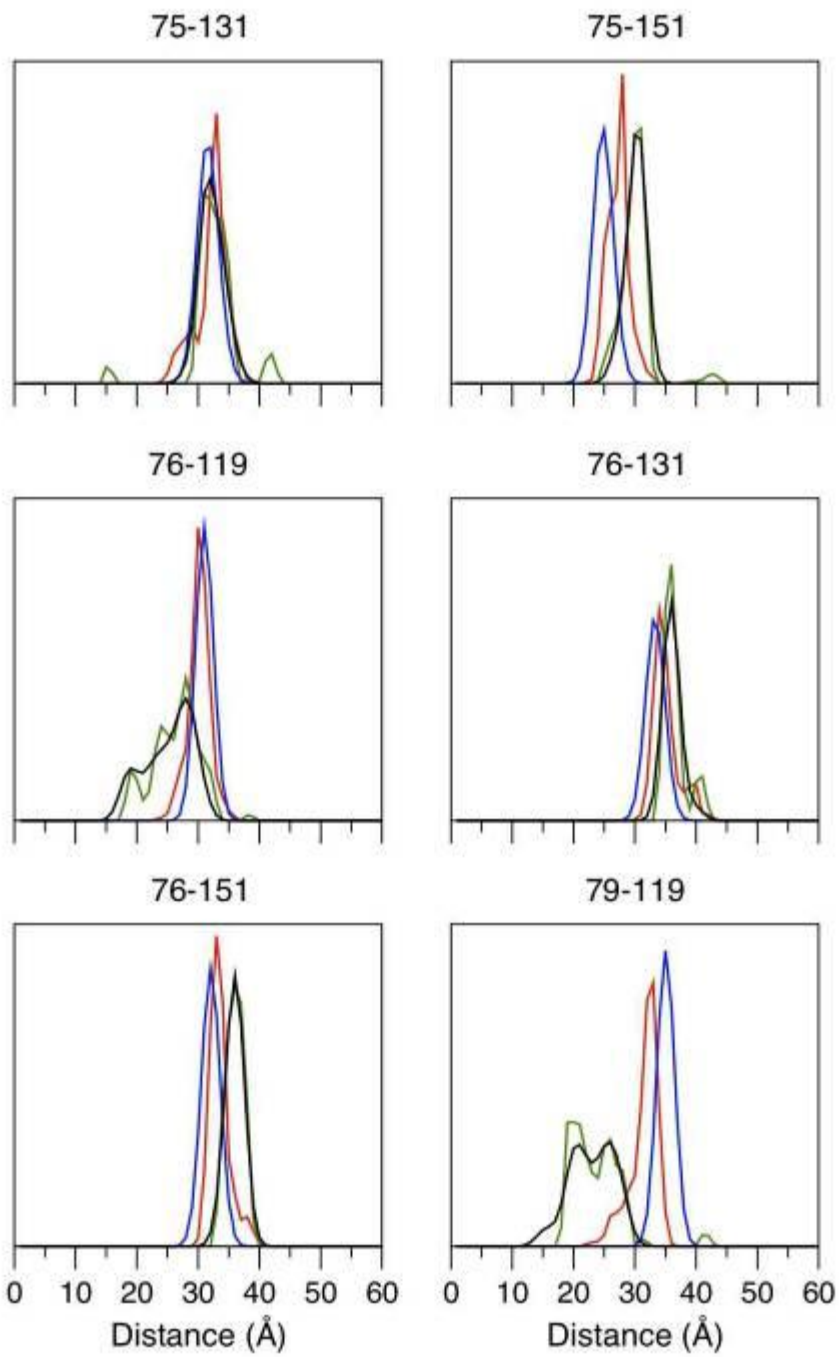

79-131

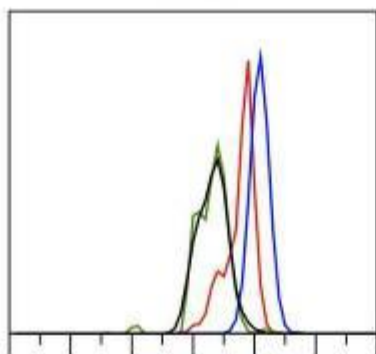

82-94

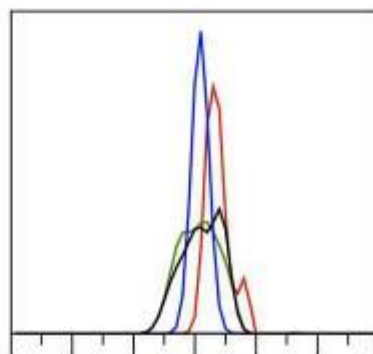

82-132

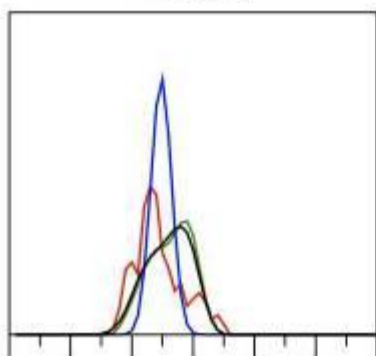

82-134

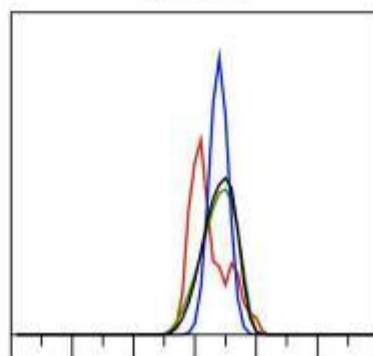

82-155

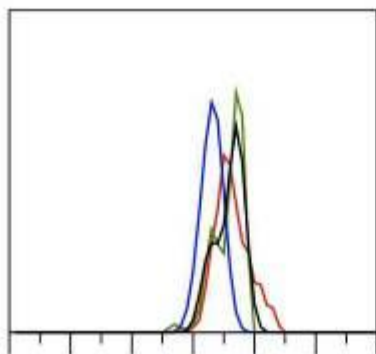

83-155

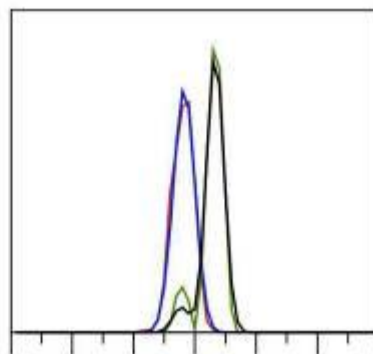

0 10 20 30 40 50 60  
Distance (Å)

0 10 20 30 40 50 60  
Distance (Å)



85-119

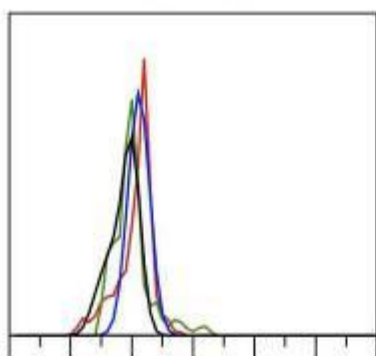

85-131

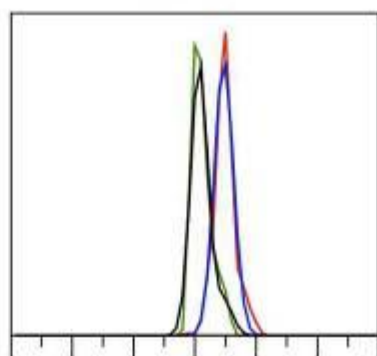

85-151

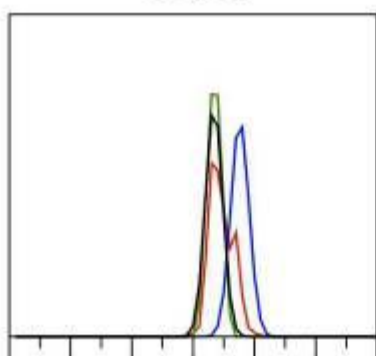

93-108

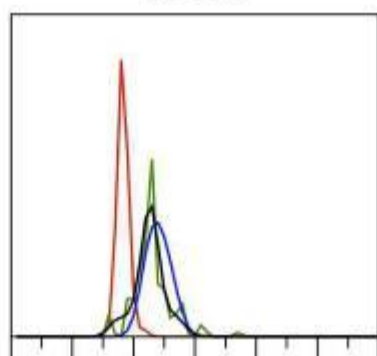

93-112

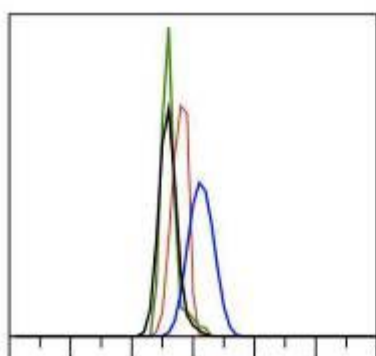

93-123

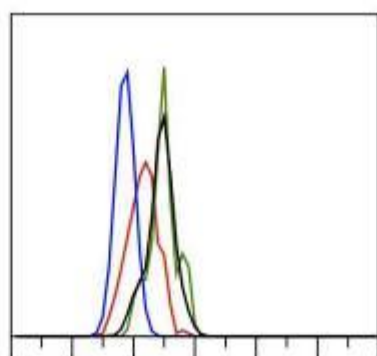

0 10 20 30 40 50 60  
Distance (Å)

0 10 20 30 40 50 60  
Distance (Å)

93-134

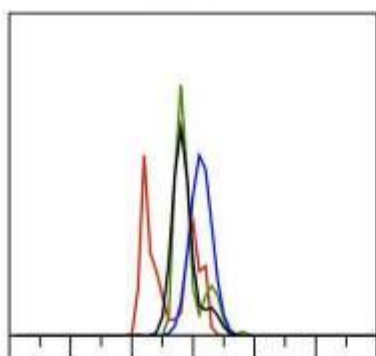

93-154

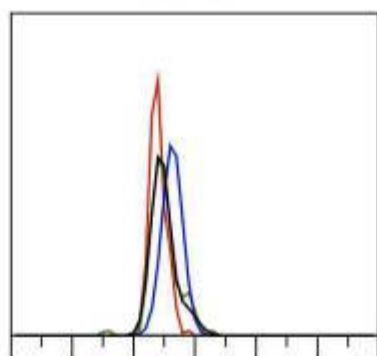

94-123

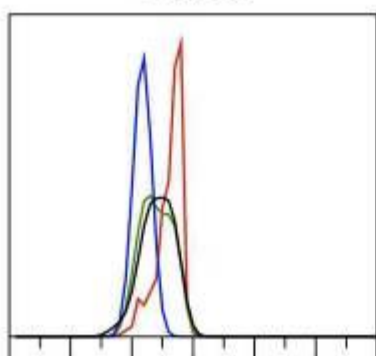

94-132

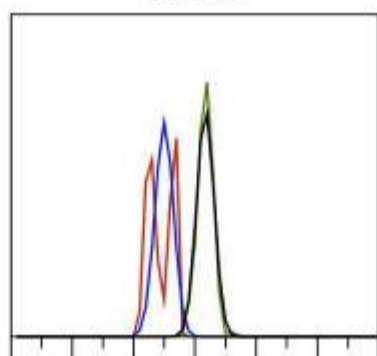

108-123

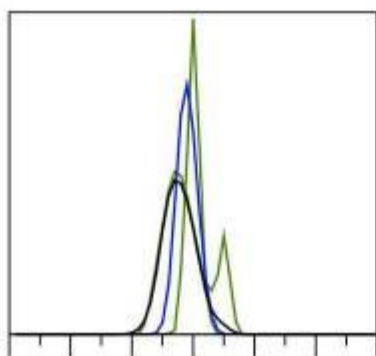

108-134

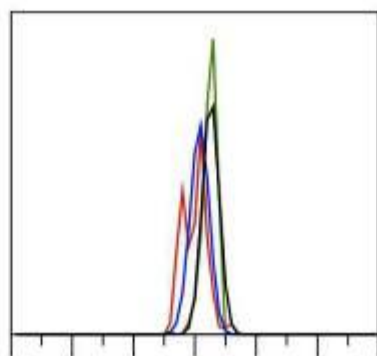

0 10 20 30 40 50 60  
Distance (Å)

0 10 20 30 40 50 60  
Distance (Å)

108-155

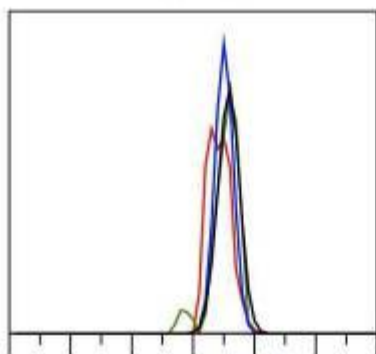

109-134

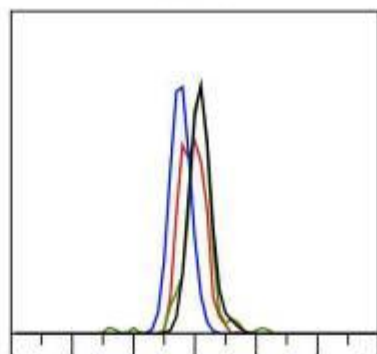

115-155

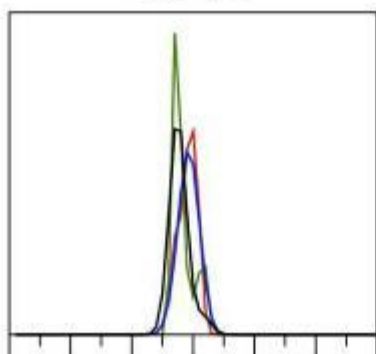

116-134

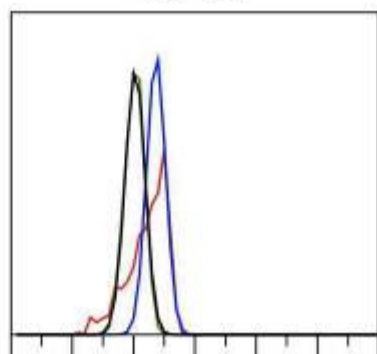

119-128

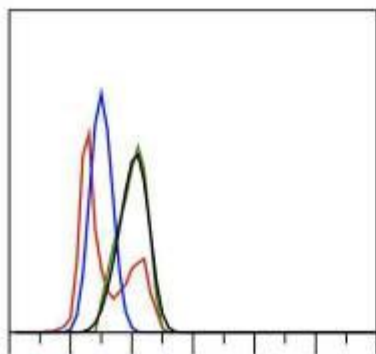

119-131

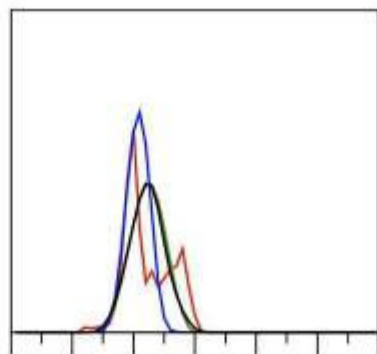

0 10 20 30 40 50 60  
Distance (Å)

0 10 20 30 40 50 60  
Distance (Å)

123-131

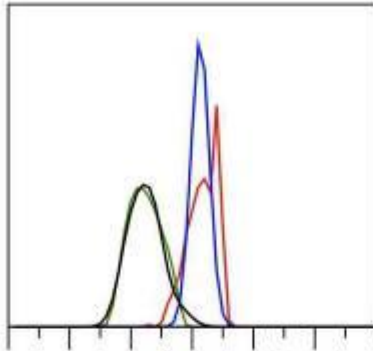

128-155

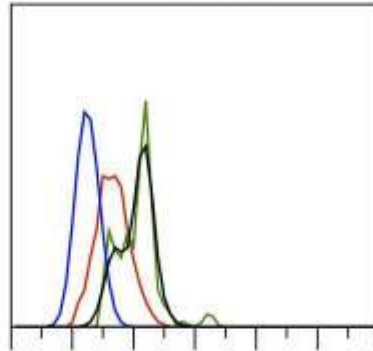

140-151

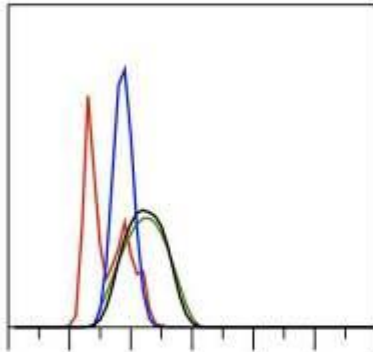



**Figure S7.** Time dependence of the dihedral angle  $\chi_3$  for all the spin-labels obtained from 140 ns conventional MD (blue) and first 600 ps RE (green) simulation. MD time scale is divided by 100 to fit the data from both restrained ensemble and molecular dynamics simulations.

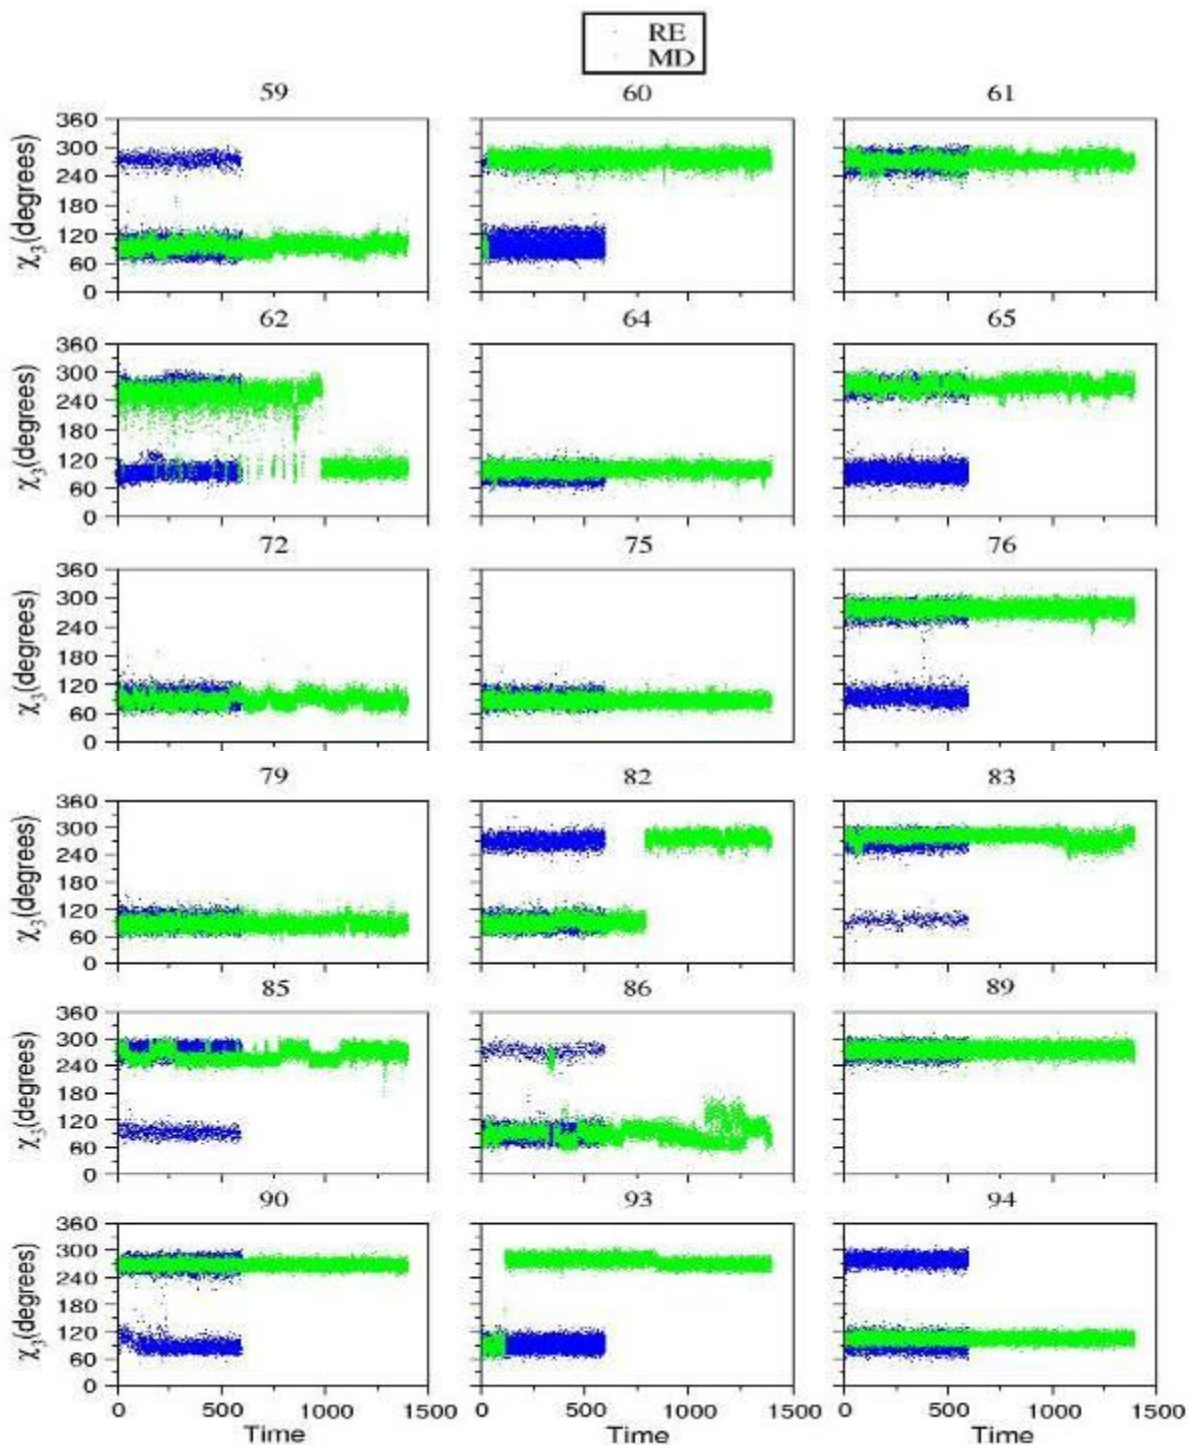

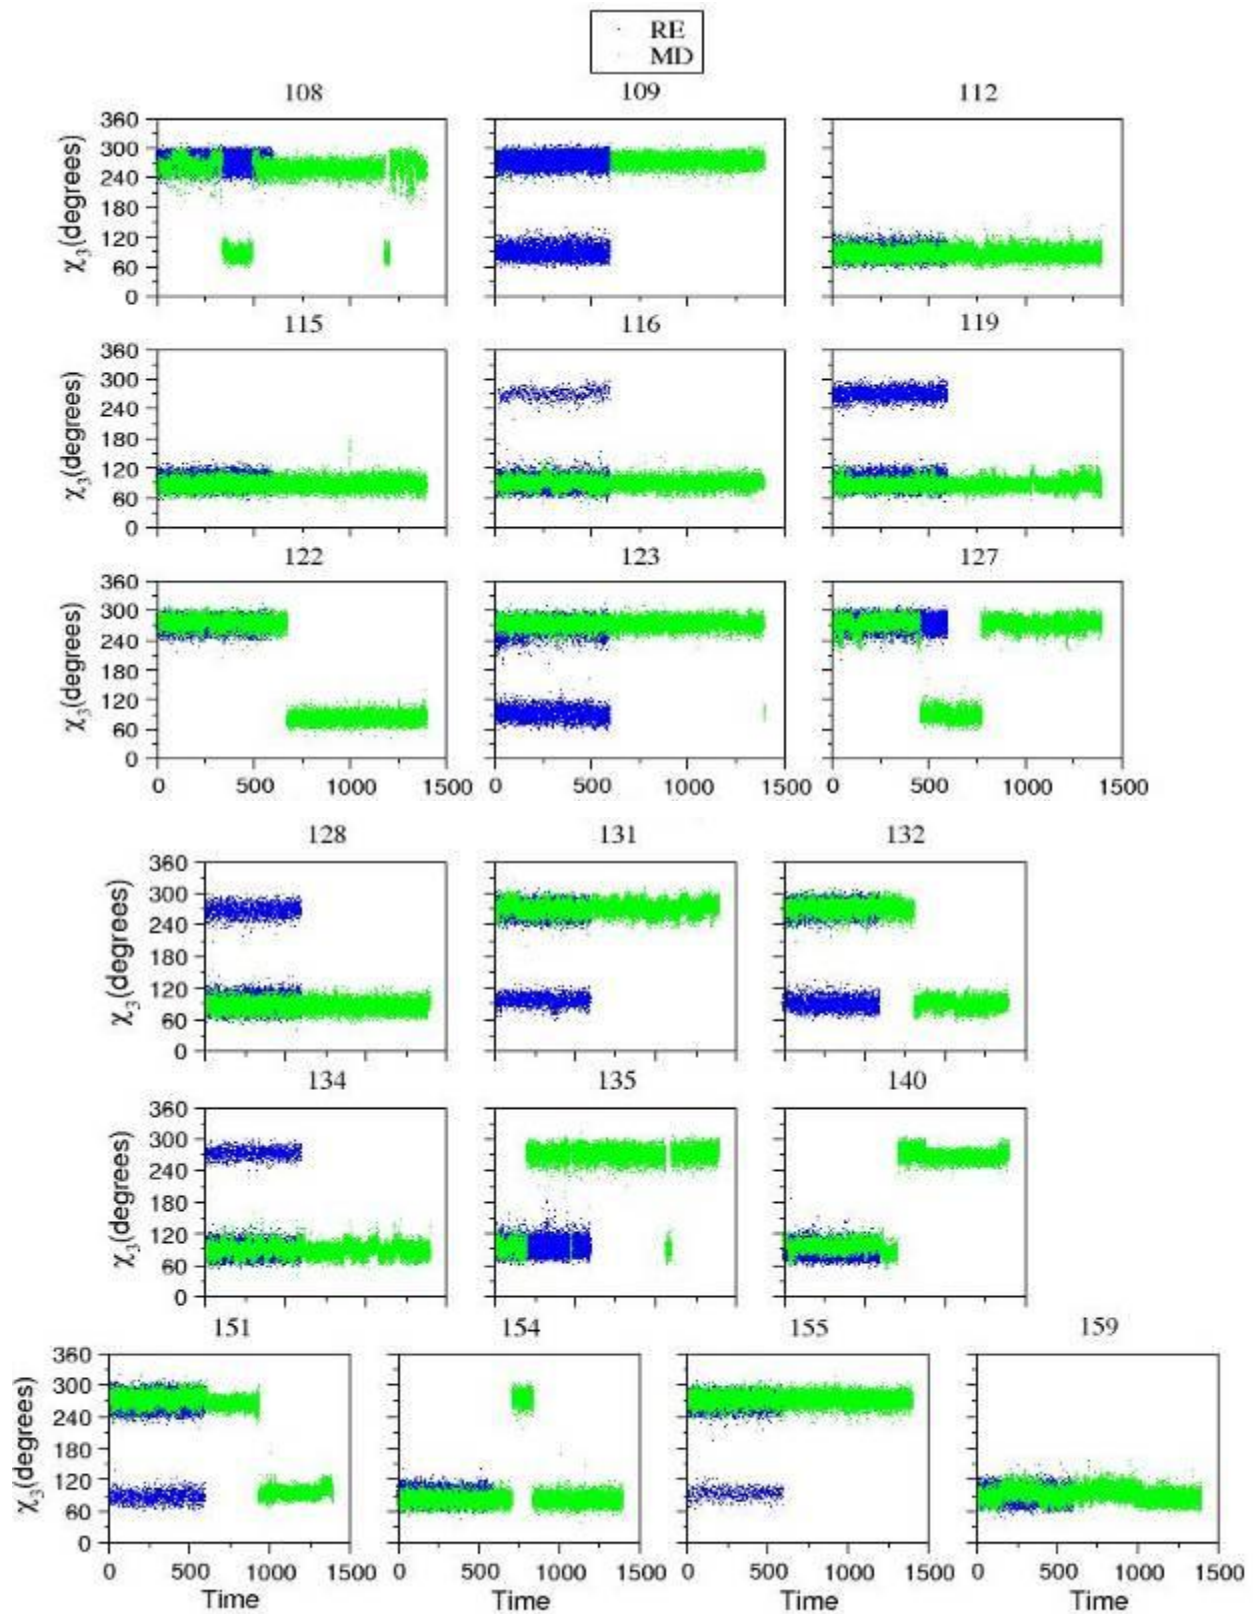

**Figure S8.** The 2D-PMF along  $\chi_1$  and  $\chi_2$  of spin-label attached to T4 lysozyme at  $\chi_3 \sim 90^\circ$  (left panel) and  $270^\circ$  (right panel) obtained from conventional MD (upper panel), locally enhanced sampling (middle panel) and restrained ensemble (lower panel) simulations. The units of the angles  $\chi_1$  and  $\chi_2$  are in degrees and the contour levels are drawn at 1 kcal/mol interval.

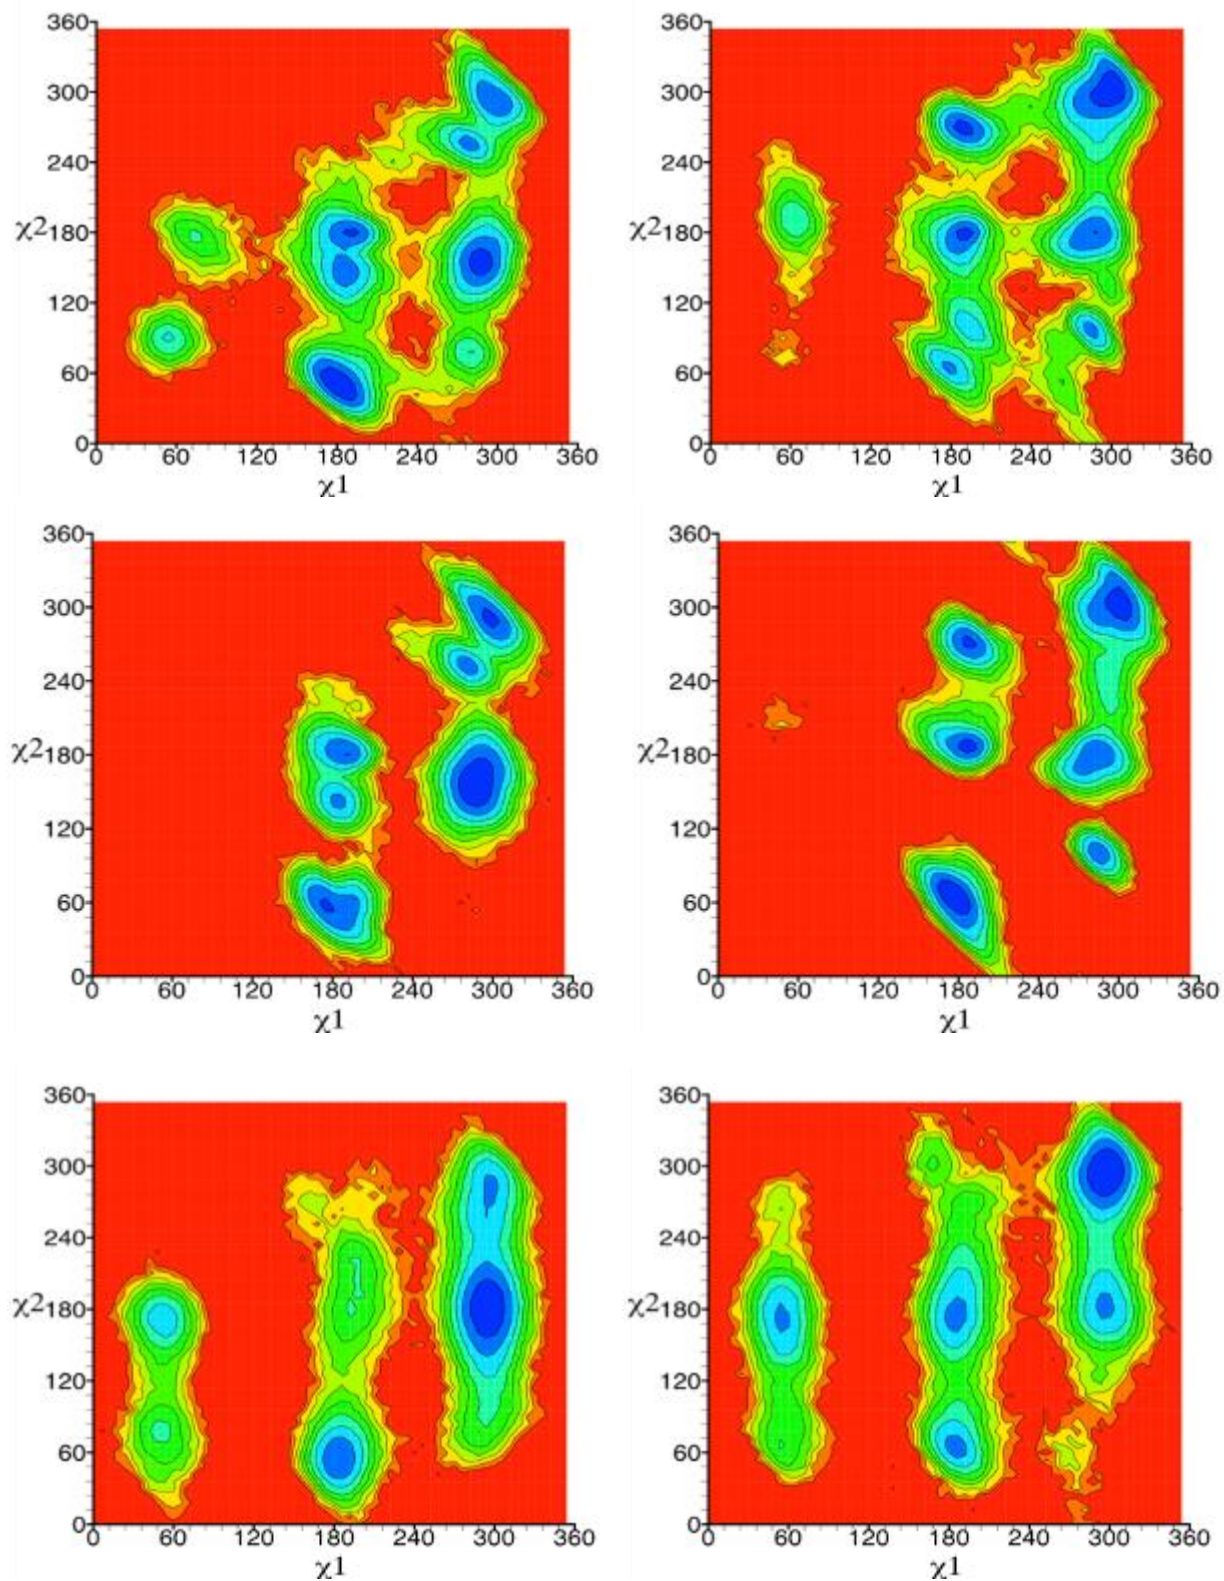



**Figure S9.** Rotamer population distribution along  $\chi_4$  and  $\chi_5$  of spin label attached to T4 Lysozyme at  $\chi_3 \approx 90^\circ$  (left panel) and  $270^\circ$  (right panel) obtained from conventional MD (upper panel), locally enhanced sampling (middle panel) and restraint ensemble (lower panel) simulations. The units of the angles  $\chi_4$  and  $\chi_5$  are in degrees.

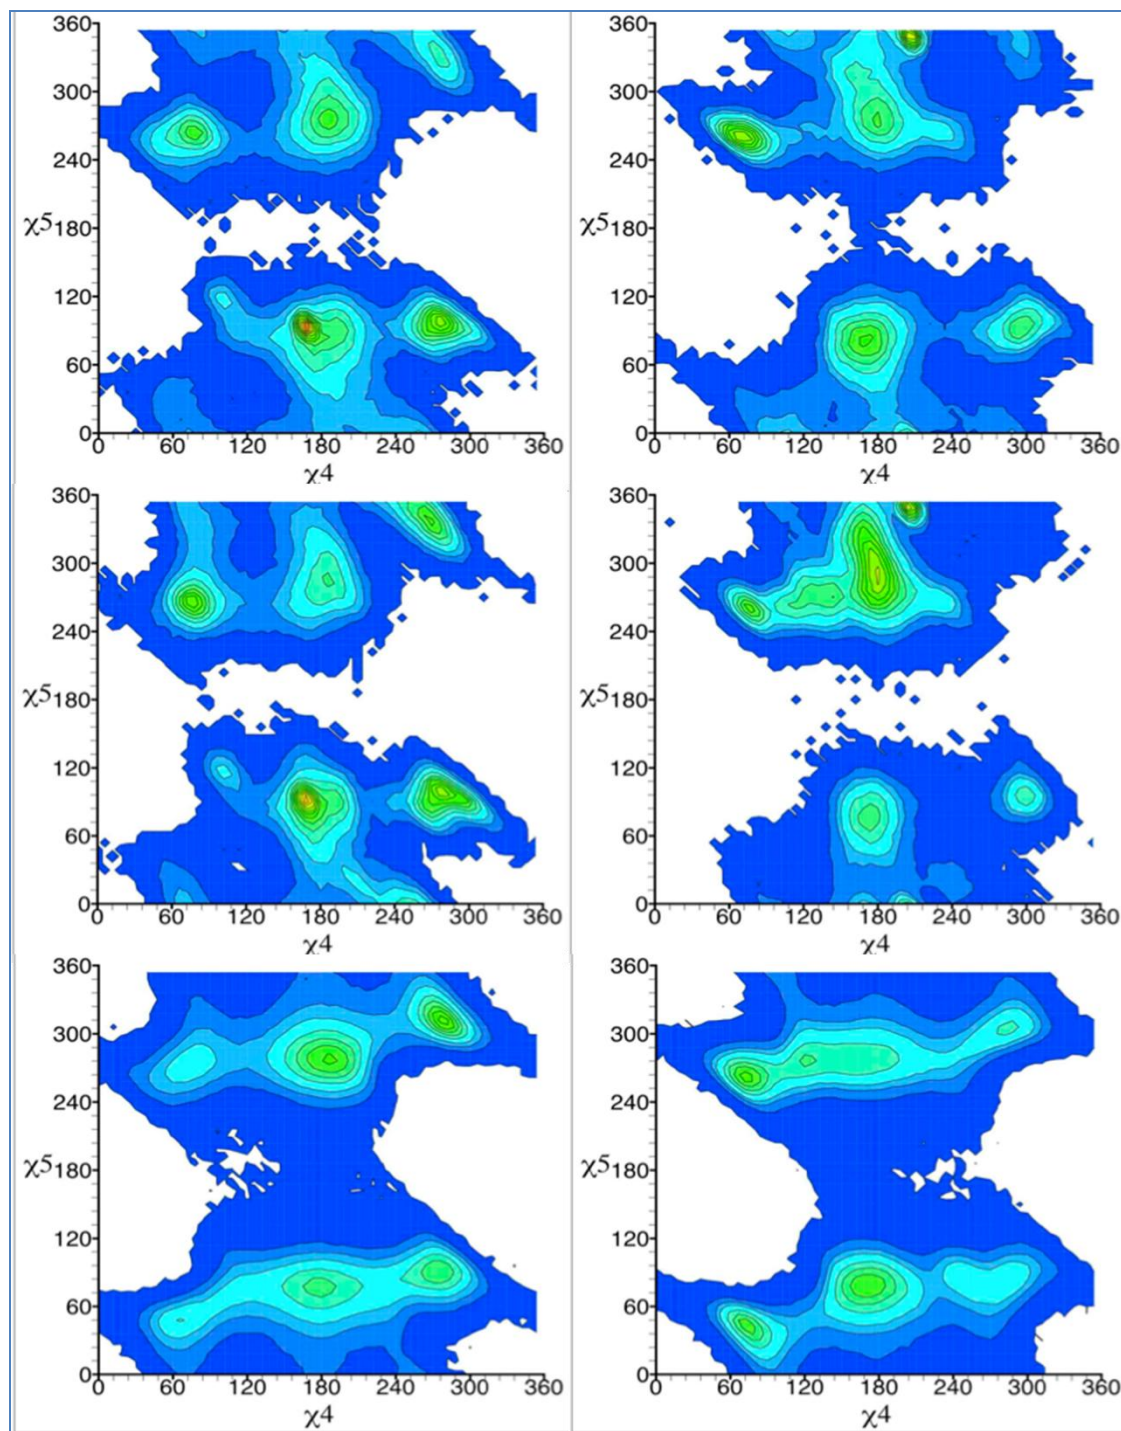



**Figure S10.** Rotamer population (%) along  $\chi_4$  and  $\chi_5$  at  $\chi_3 \approx 90^\circ$  (left panel) and  $270^\circ$  (right panel) of 37 individual spin labels attached to T4 Lysozyme in solution obtained from restraint ensemble simulations.

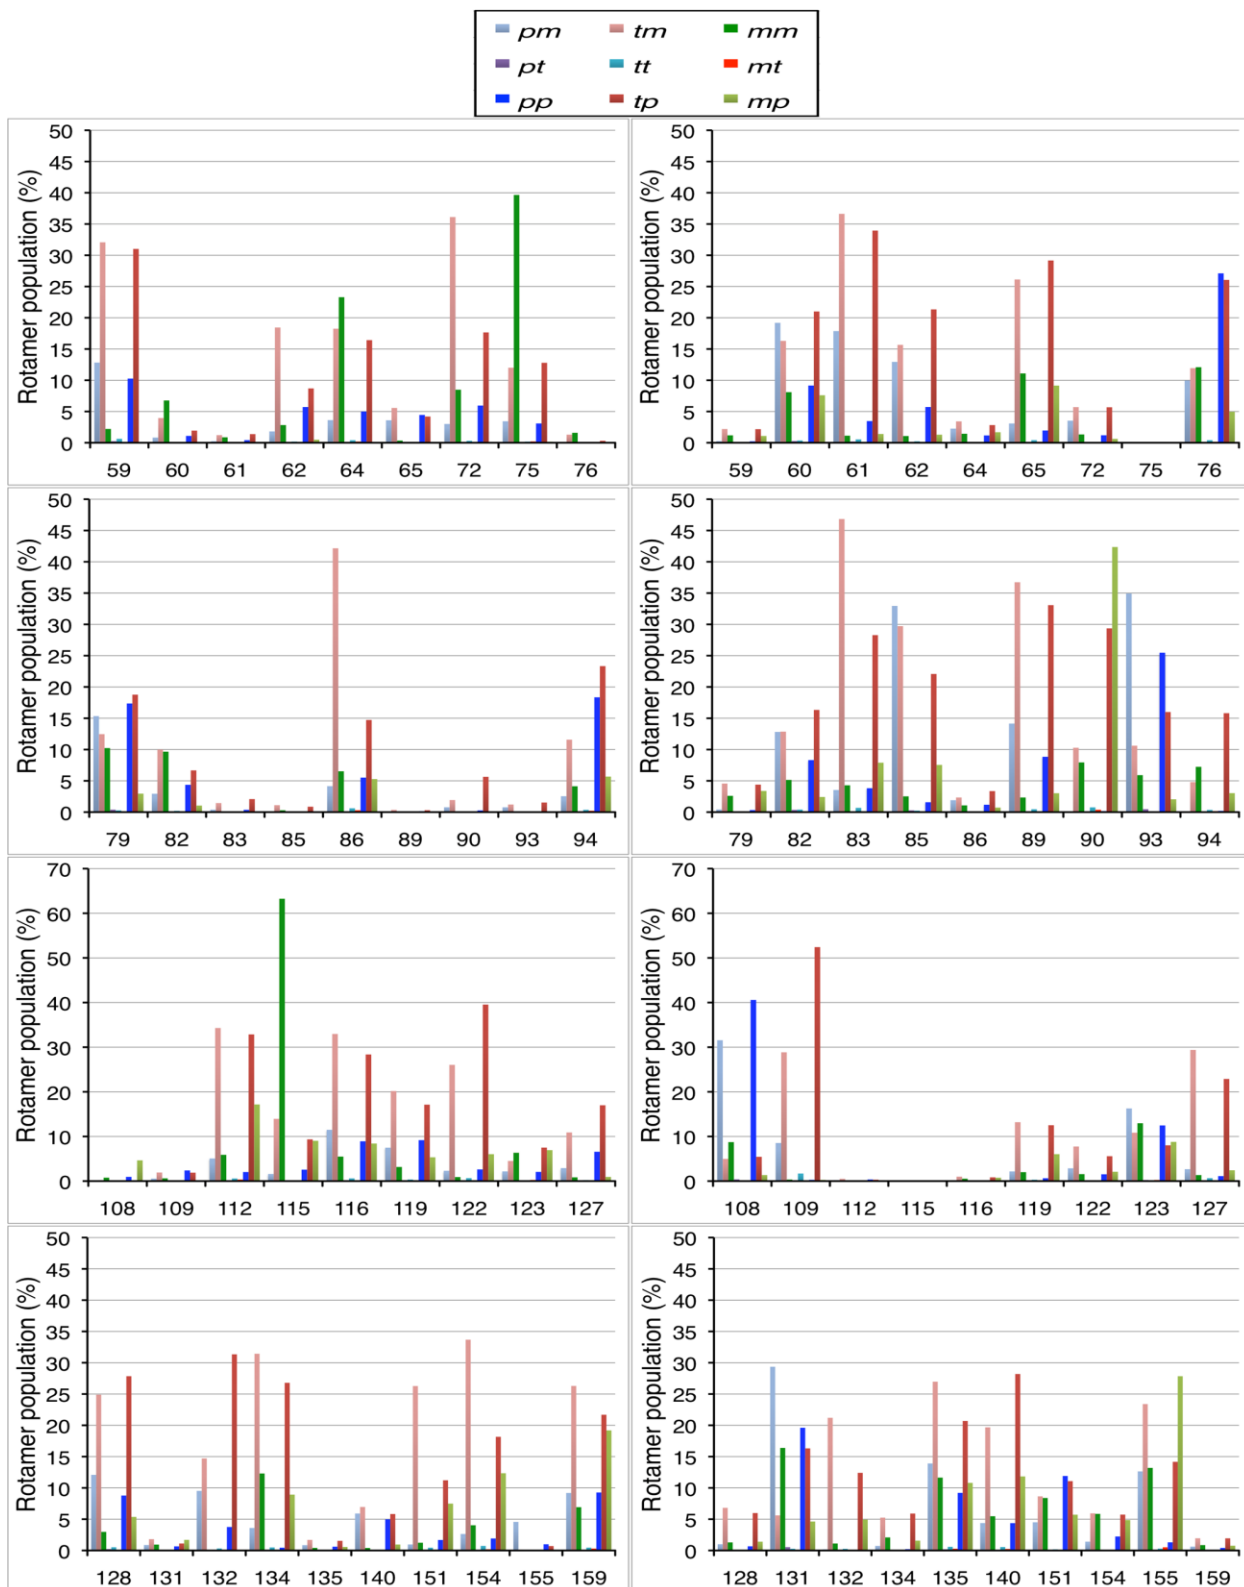

**Figure S11.** The 2D-PMF along  $\chi_4$  and  $\chi_5$  of spin-label attached to T4 Lysozyme at  $\chi_3 \sim 90^\circ$  (left panel) and  $270^\circ$  (right panel) obtained from conventional MD (upper panel), locally enhanced sampling (middle panel) and restrained ensemble (lower panel) simulations. The units of the angles  $\chi_4$  and  $\chi_5$  are in degrees and the contour levels are drawn at 1 kcal/mol interval.

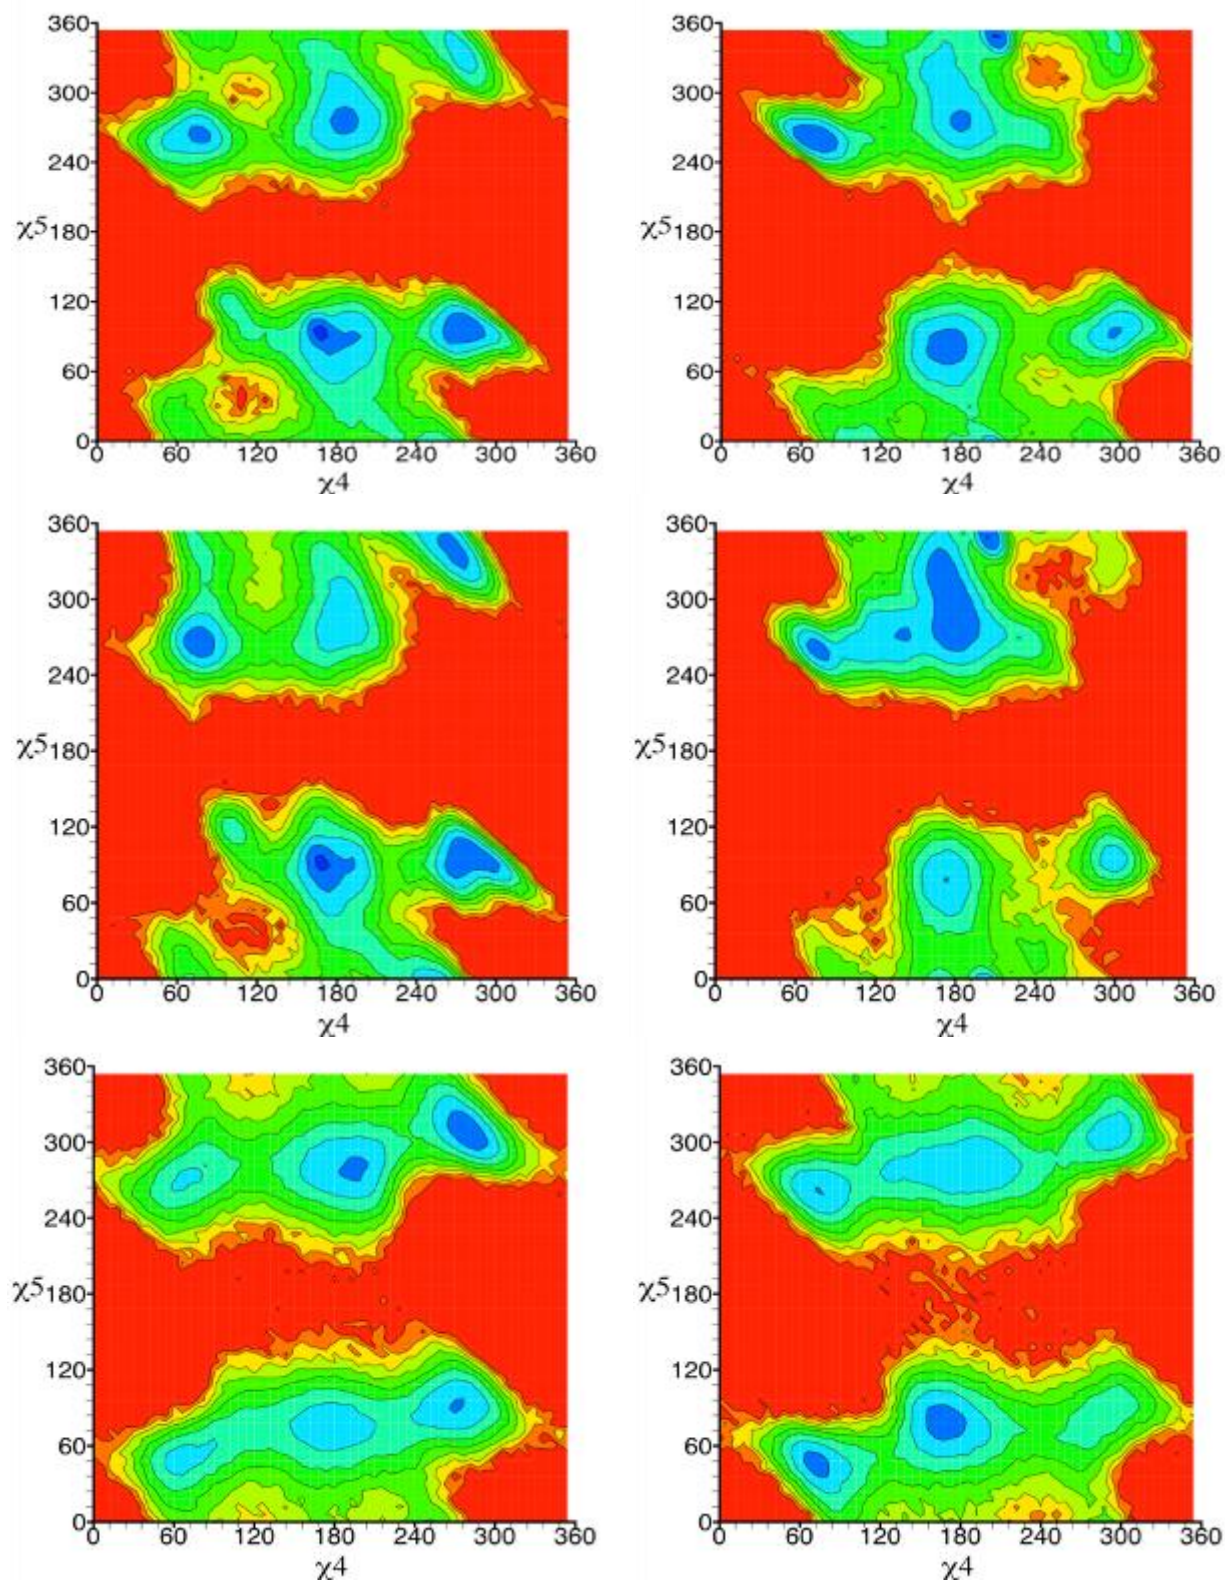

**Figure S12.** The correlation of the  $C_\beta-C_\alpha-ON$  angle and the  $N-C_\alpha-C_\beta-ON$  dihedral angle, where the left panel represents the 2D PMF calculated from the product of the 1D PMFs of the  $C_\beta-C_\alpha-ON$  and the  $N-C_\alpha-C_\beta-ON$  dihedral angles, while the right hand side is the joint 2D PMF calculated from the RE simulation.

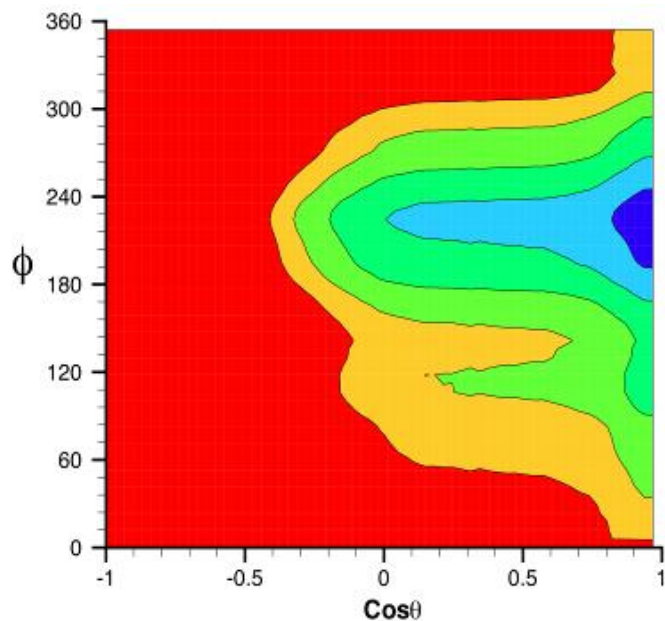

PMF ( $\phi$ ) x PMF ( $\theta$ )

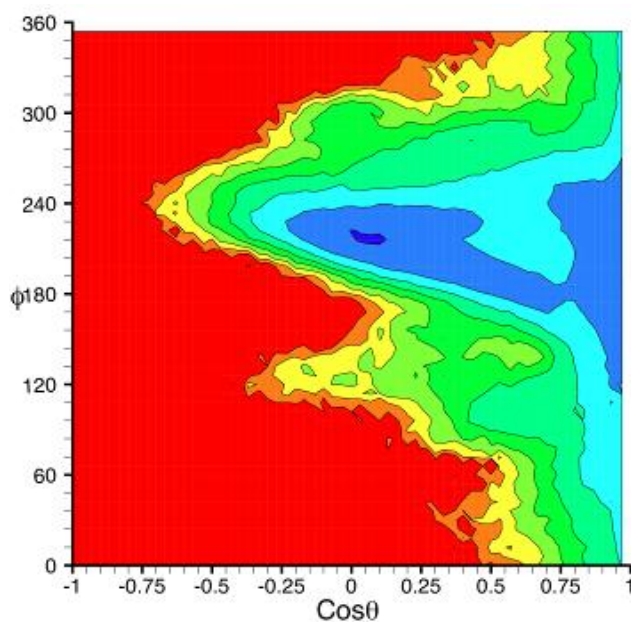

PMF ( $\phi, \theta$ )

**Figure S13.** Comparison of the spin-spin distance histograms obtained from 5ns molecular dynamics simulation of the ON dummy atom linked T4L (red line) and experiment (black line).

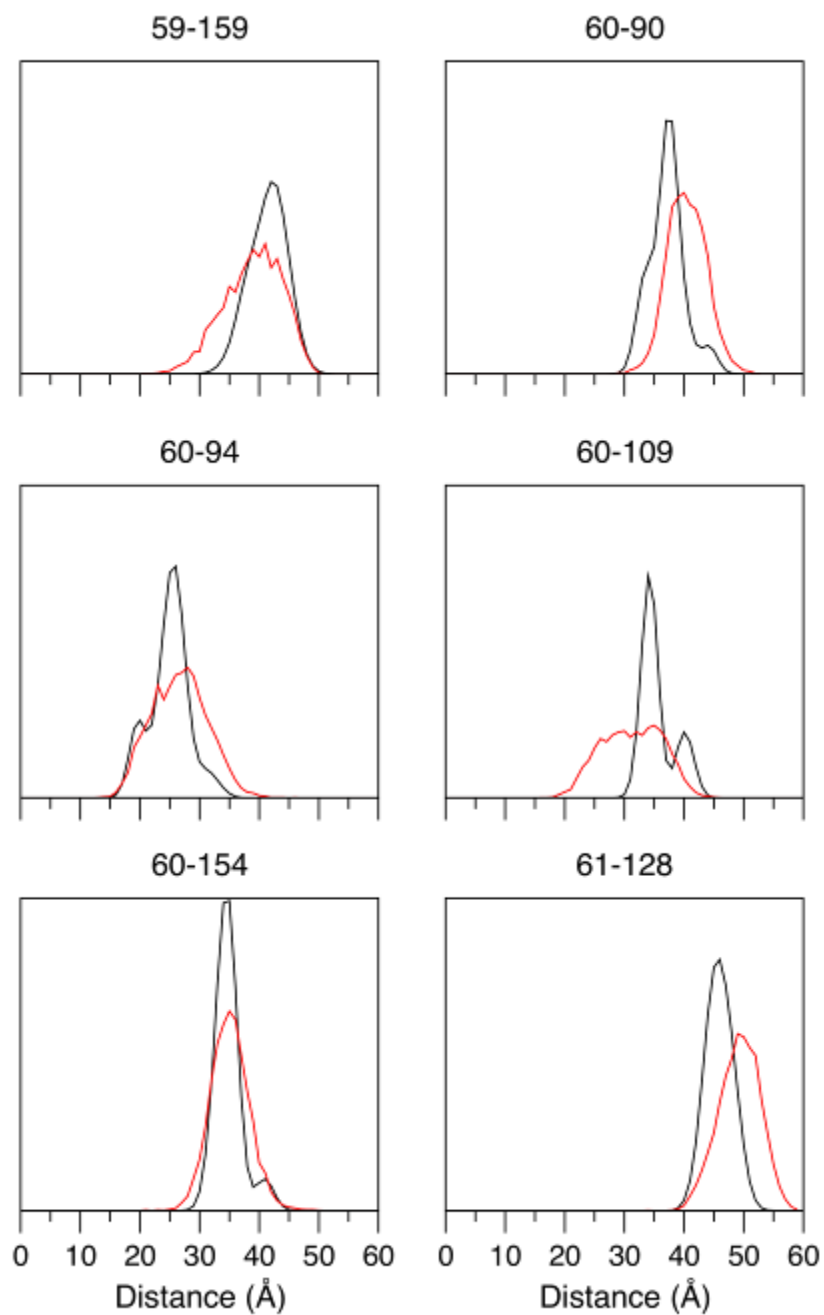



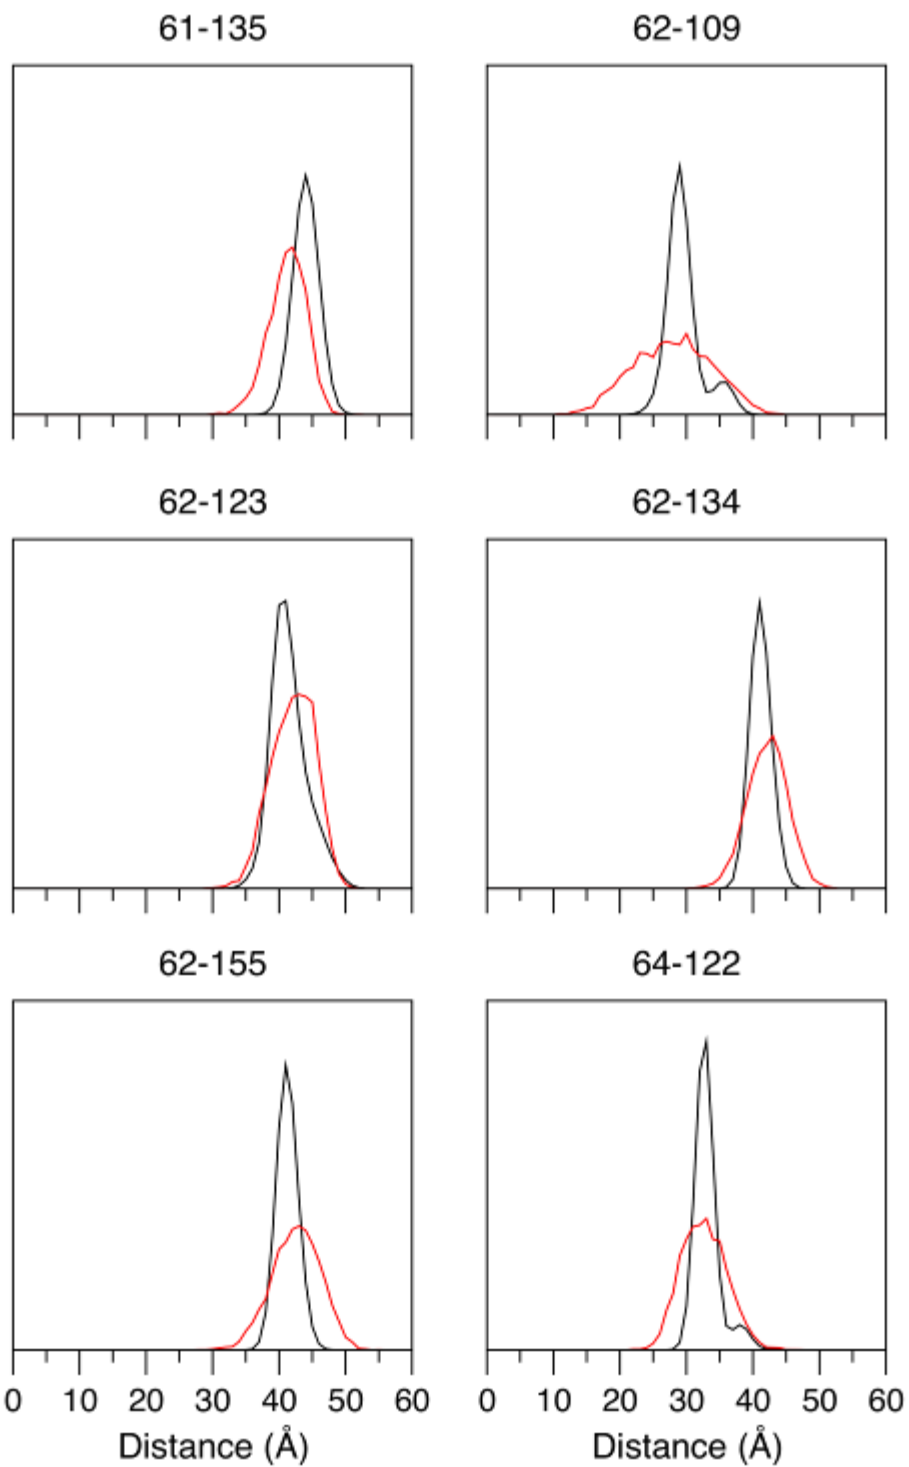

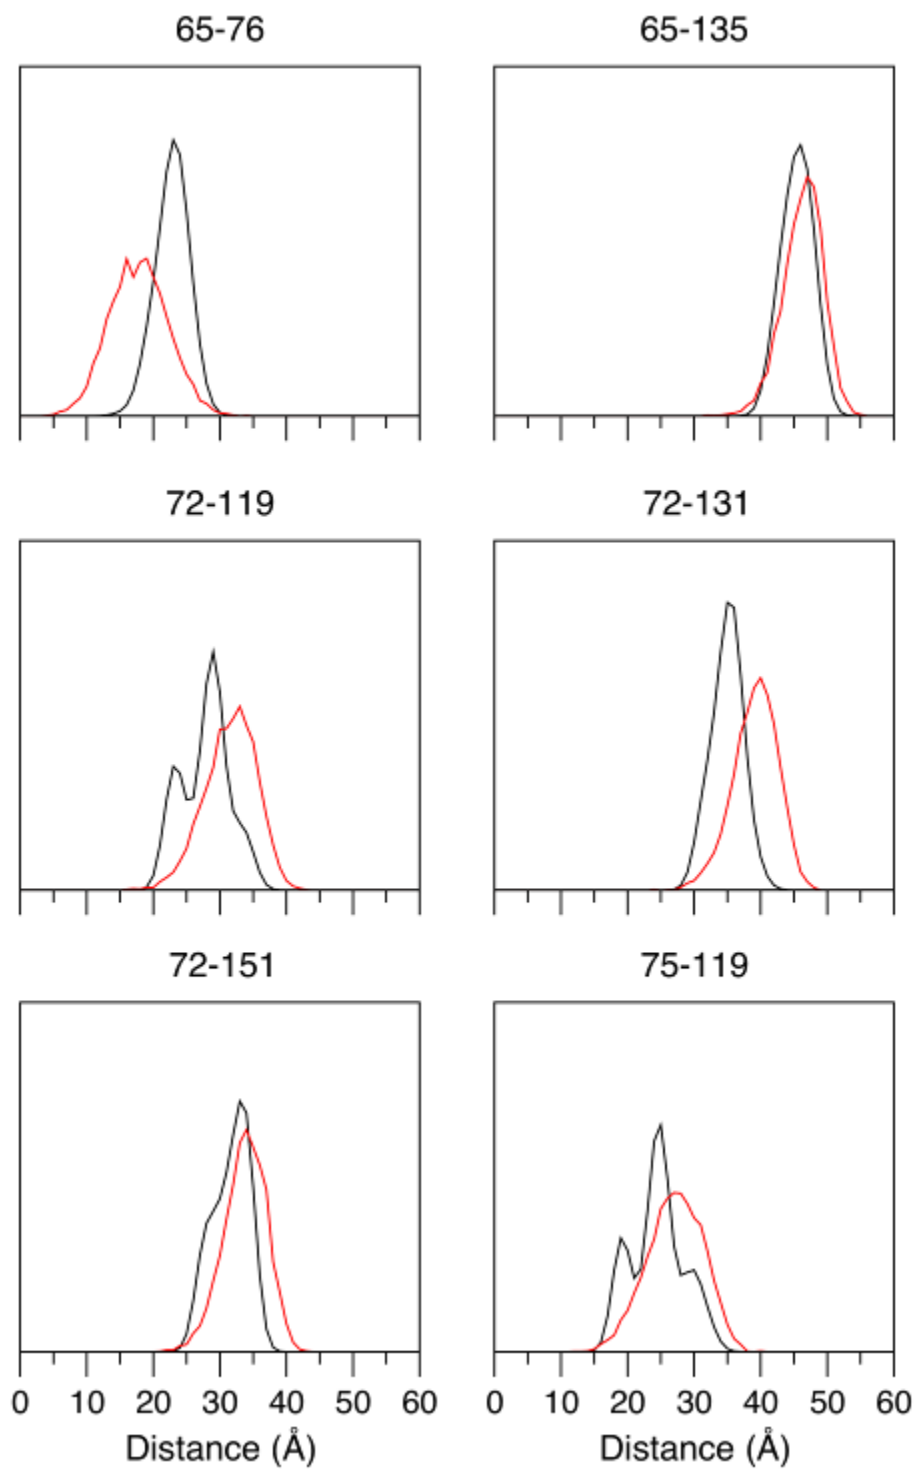

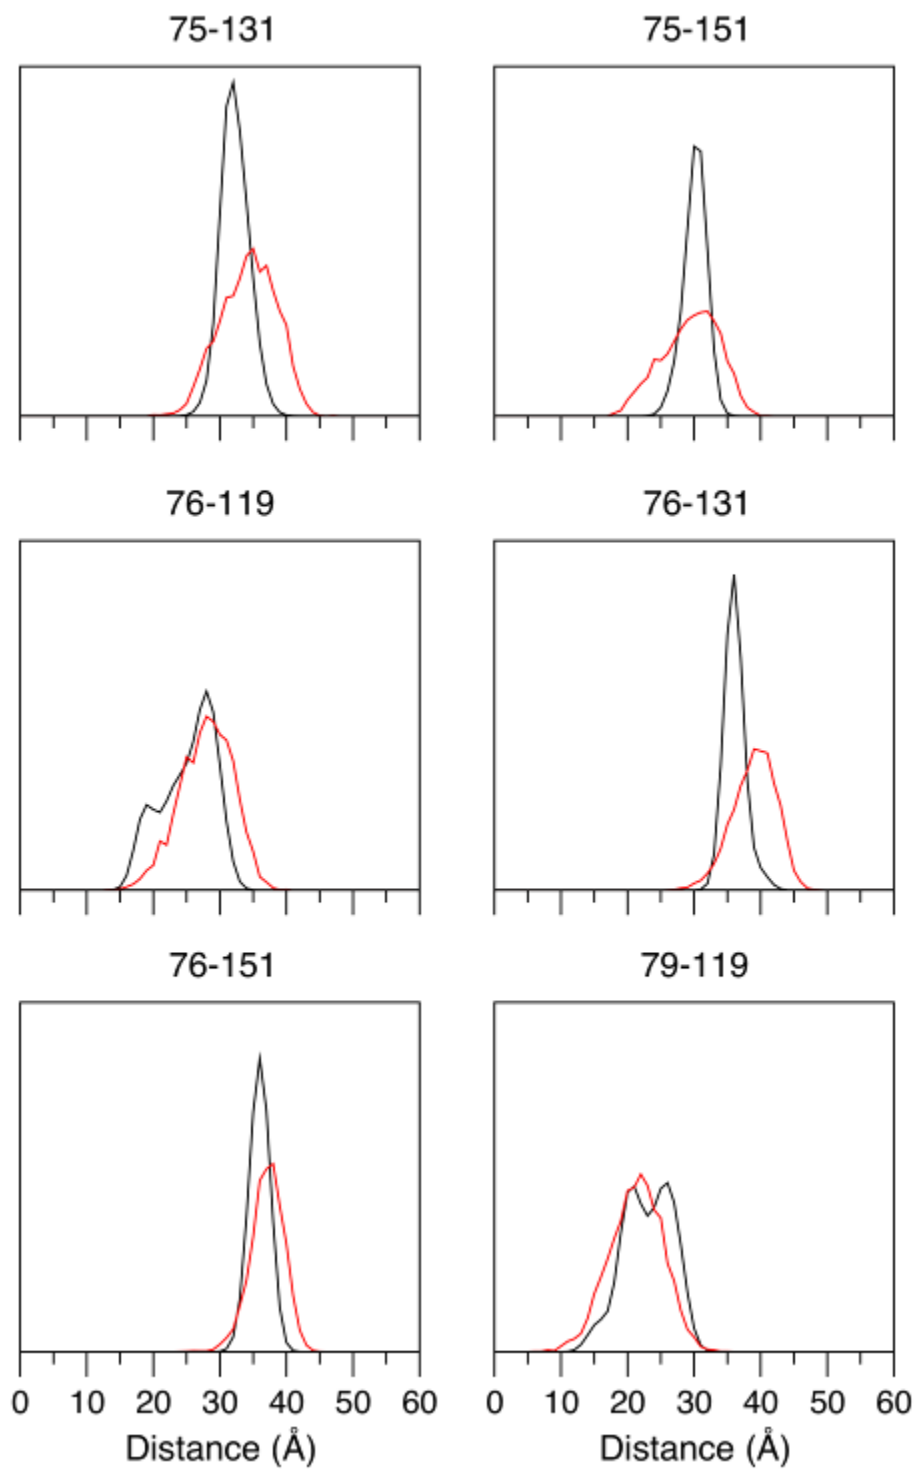

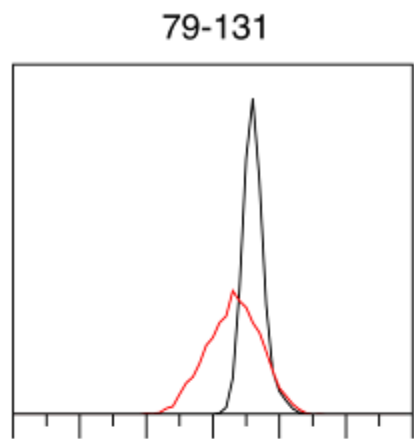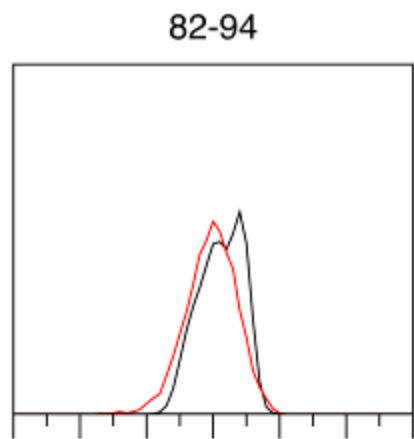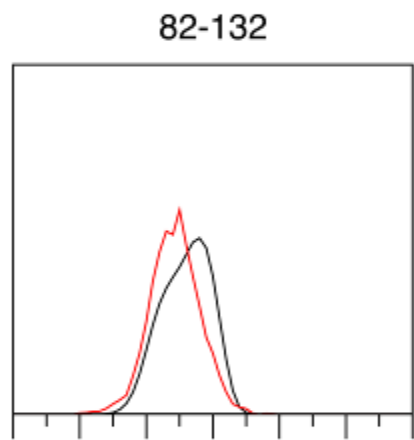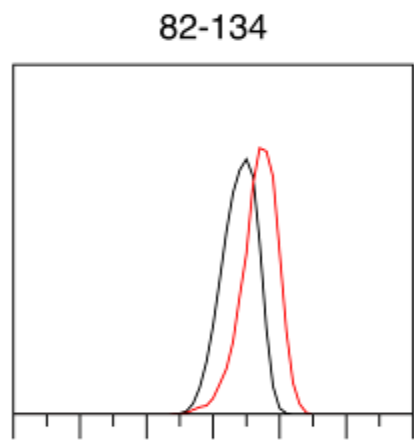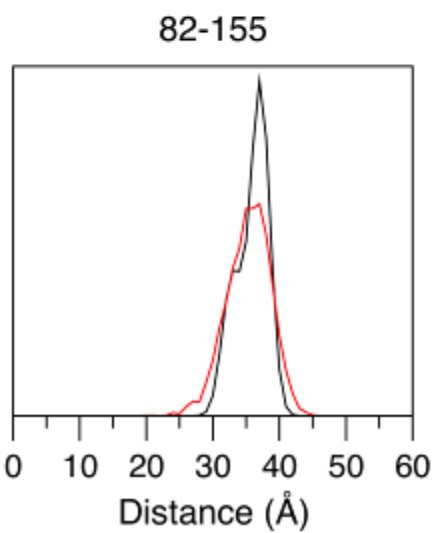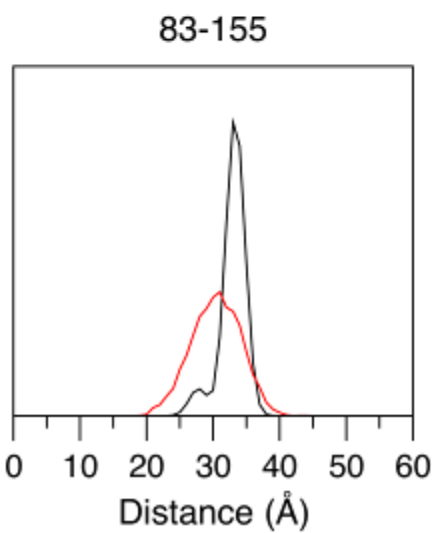

85-119

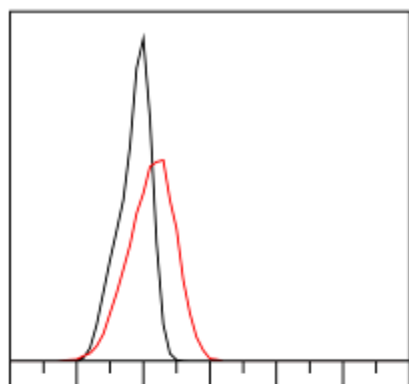

85-131

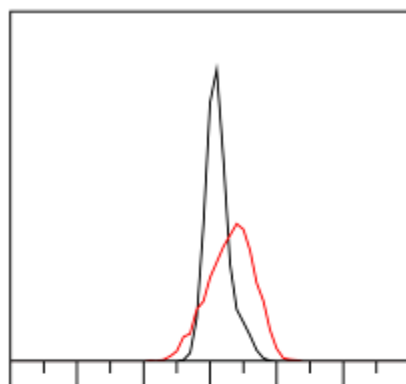

85-151

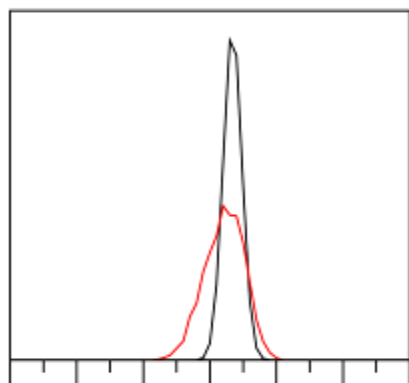

93-108

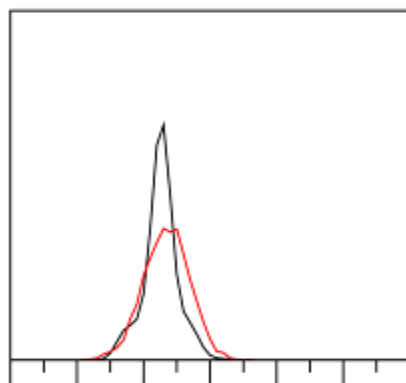

93-112

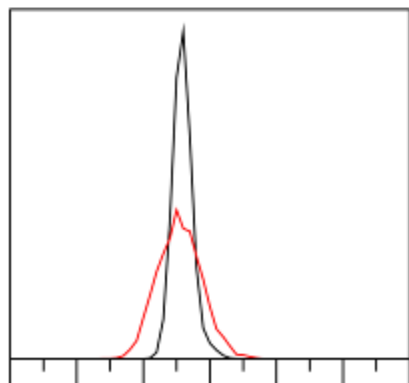

93-123

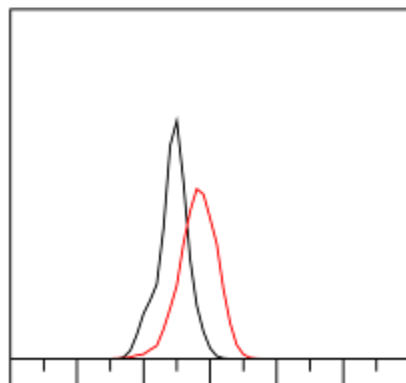

0 10 20 30 40 50 60  
Distance (Å)

0 10 20 30 40 50 60  
Distance (Å)

93-134

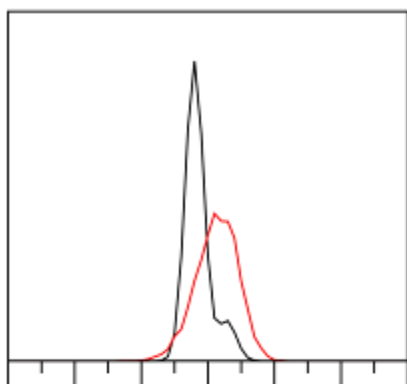

93-154

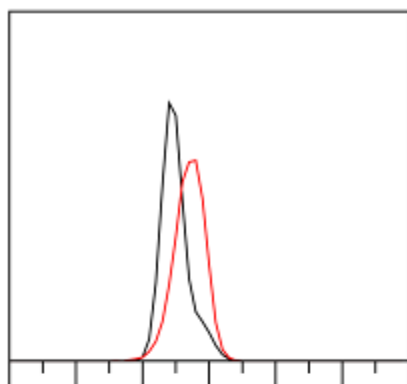

94-123

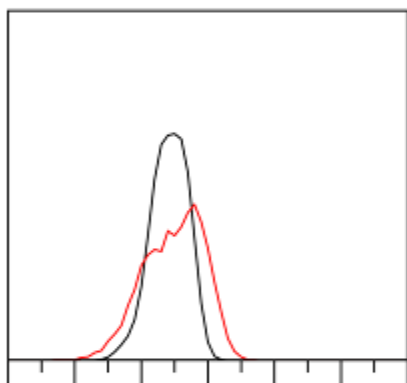

94-132

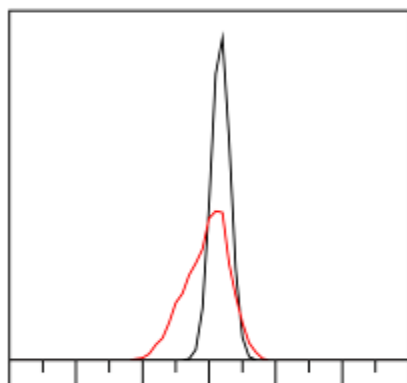

108-123

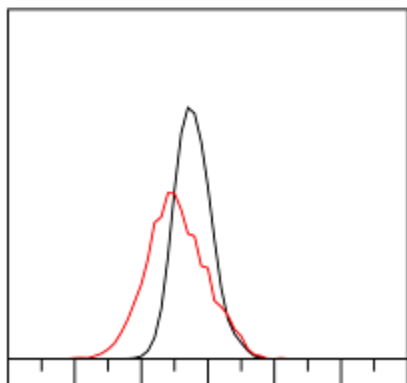

108-134

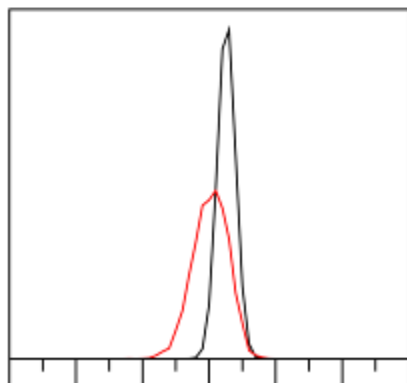

0 10 20 30 40 50 60  
Distance (Å)

0 10 20 30 40 50 60  
Distance (Å)



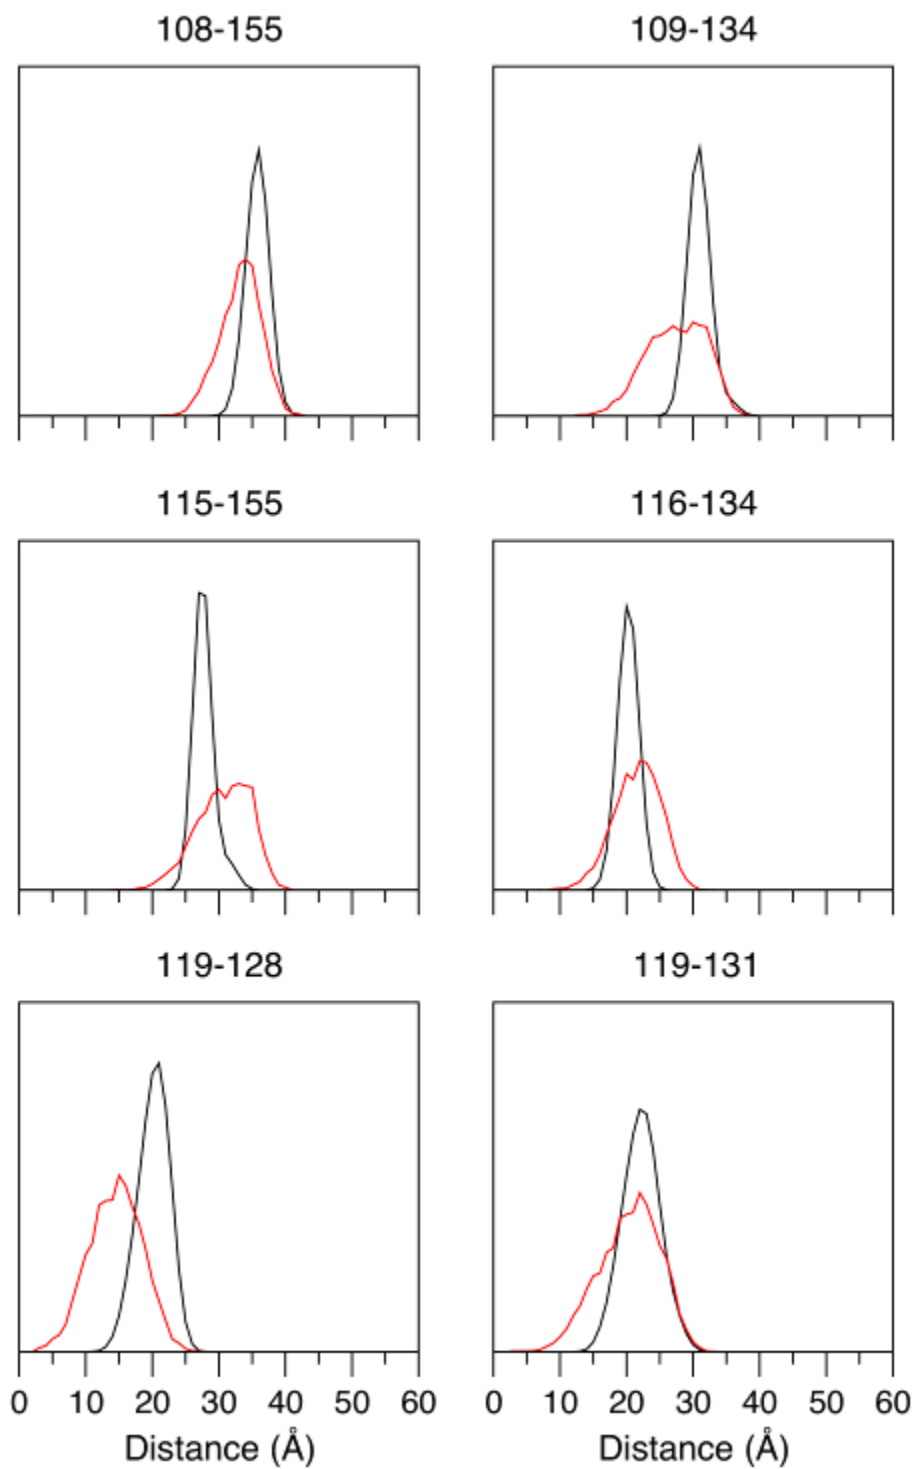

123-131

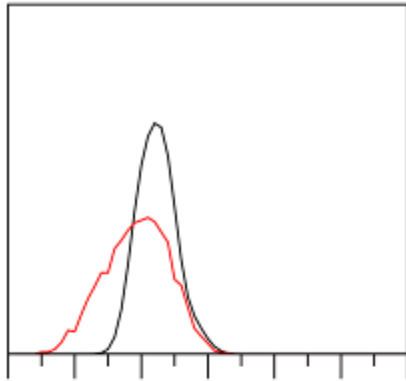

128-155

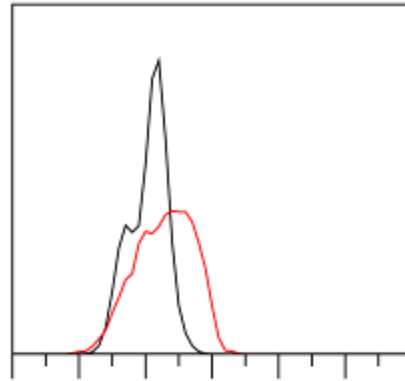

140-151

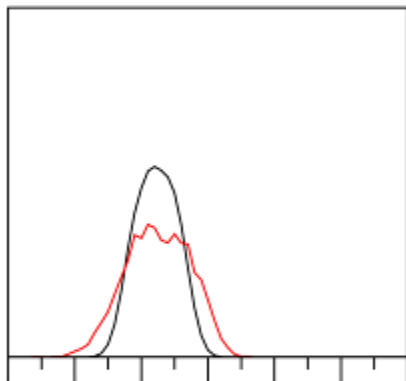

**Figure S14.** Comparison of 51 inter-label average experimental ( $R_{\text{exp}}$ ) and dummy nitroxide atom MD simulation ( $R_{\text{cal}}$ ) distances in T4L. The correlation coefficient was found to be 0.91.

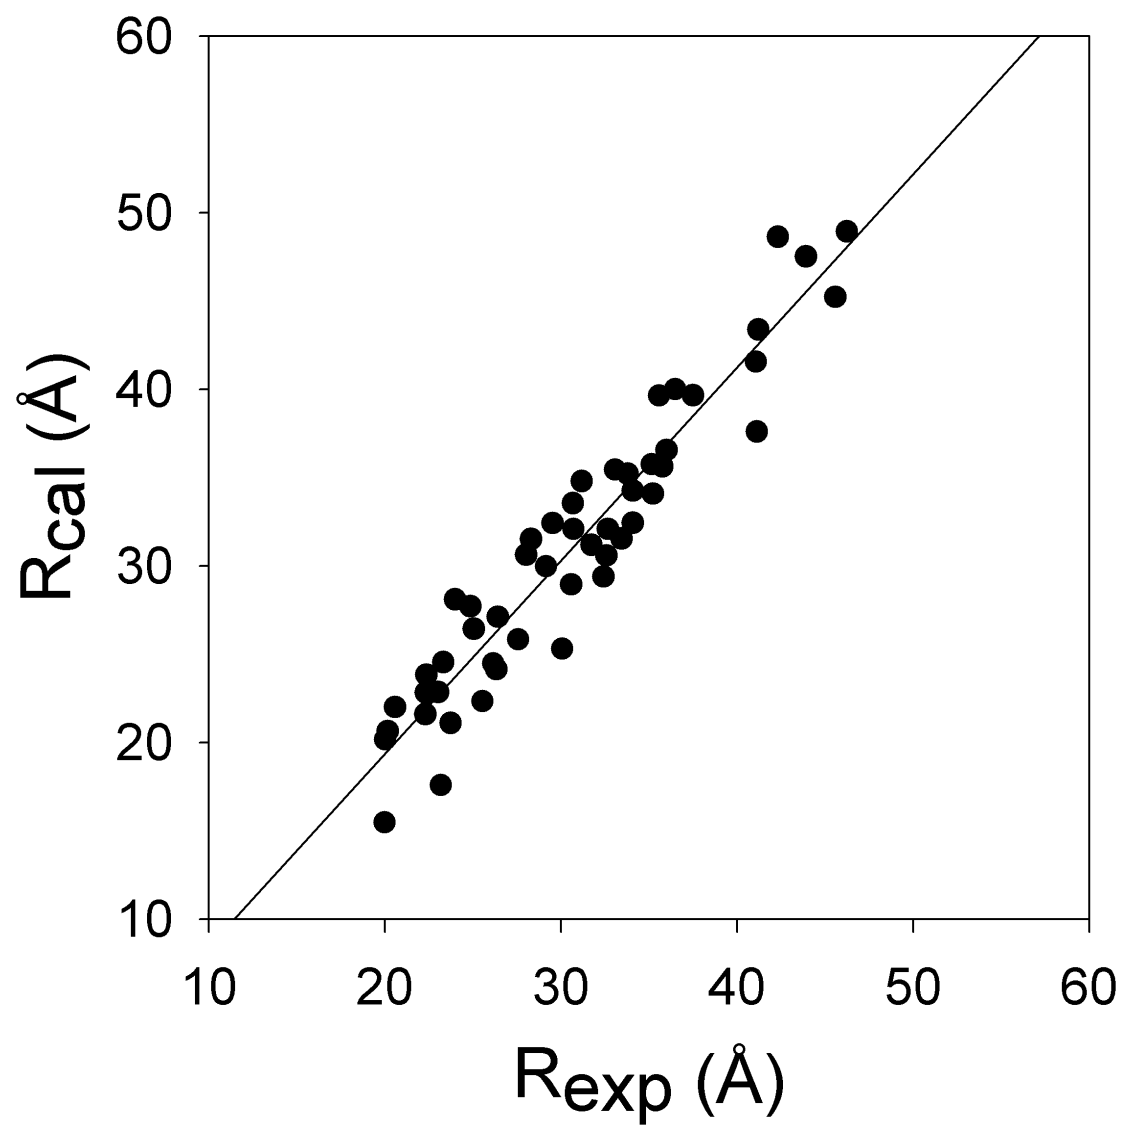

**Figure S15.** Correlation of 51 inter label experimental ( $R_{\text{exp}}$ ) and MMM ( $R_{\text{cal}}$ ) distances in T4L which gave a correlation coefficient of 0.85.

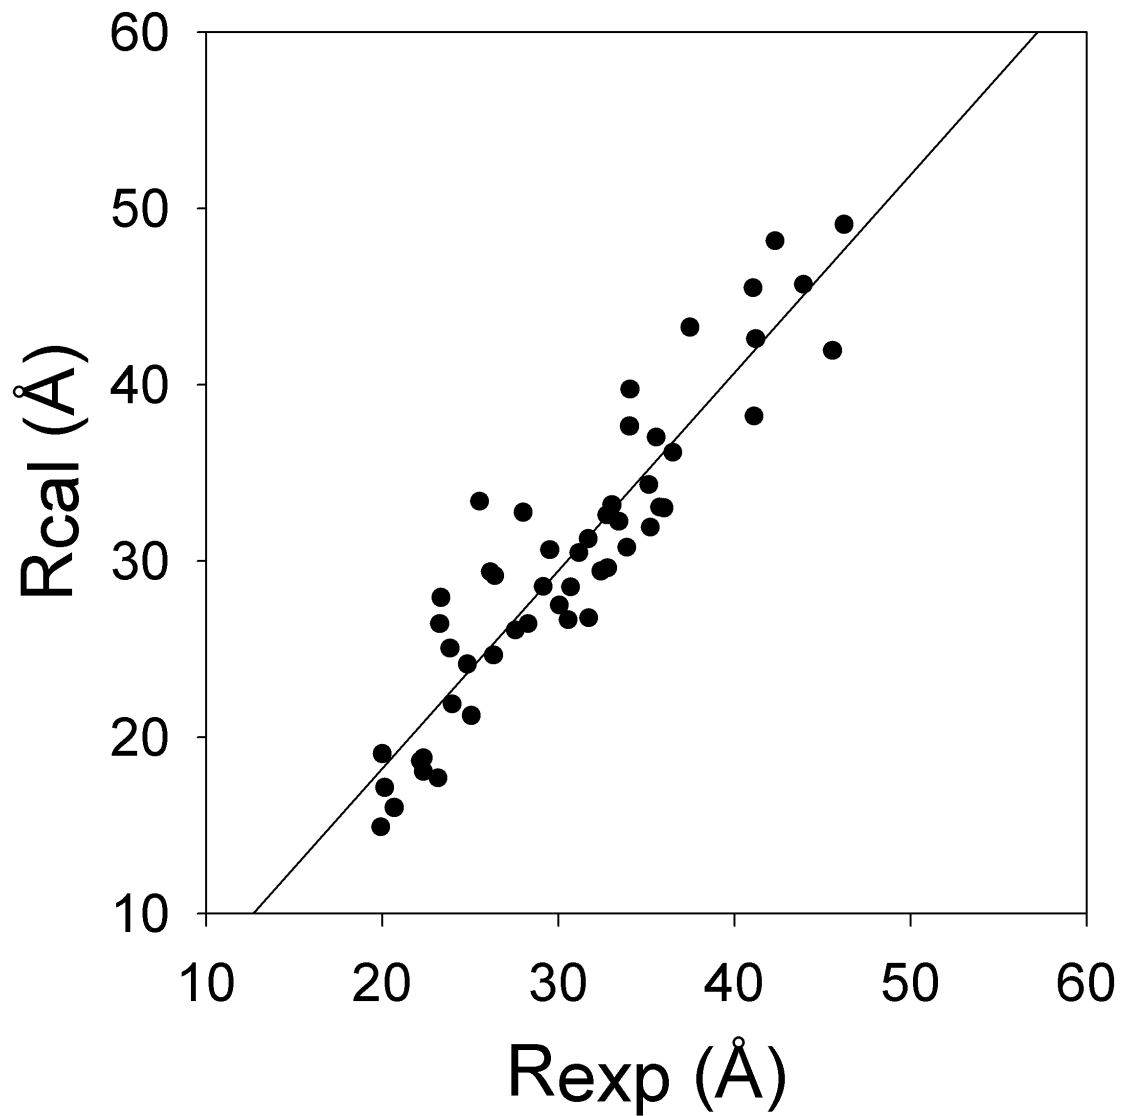

**Figure S16.** Force field parameter (**A**) and topology (**B**) for pseudo nitroxide dummy atom.

**A.**

\* Parameter for nitroxide dummy atom

\*

BONDS

CT1 OND 0.5 7.9

CP1 OND 0.5 7.9 ! proline

ANGLES

CT2 CT1 OND 1.0 46.0

CT3 CT1 OND 1.0 46.0

CP2 CP1 OND 1.0 46.0 ! proline

CT1 CT1 OND 1.0 46.0 ! Isoleucine

DIHEDRALS

NH1 CT1 CT2 OND 1.9 1 43.0

NH1 CT1 CT3 OND 1.9 1 43.0

NH1 CP1 CP2 OND 1.9 1 43.0 ! Protein

NONBONDED

OND 0.0 -0.05 2.0

NBFIX

OND OT 0.0 0.0

OND HT 0.0 0.0

OND OND 0.0 0.0

END

**B.**

\* Topology for nitroxide dummy atom

\*

31 1

MASS 200 OND 15.999400 O

PRES ONDUM 0.00

GROUP

ATOM ON OND 0.0

BOND CA ON

ANGLE CB CA ON

DIHE N CA CB ON

IC N CA CB ON 1.4603 110.28 -137.00 124.91 7.02

END

**Figure S17.** Cartoon representation of T4L with replicated ON dummy atoms colored in blue used for RE simulation.

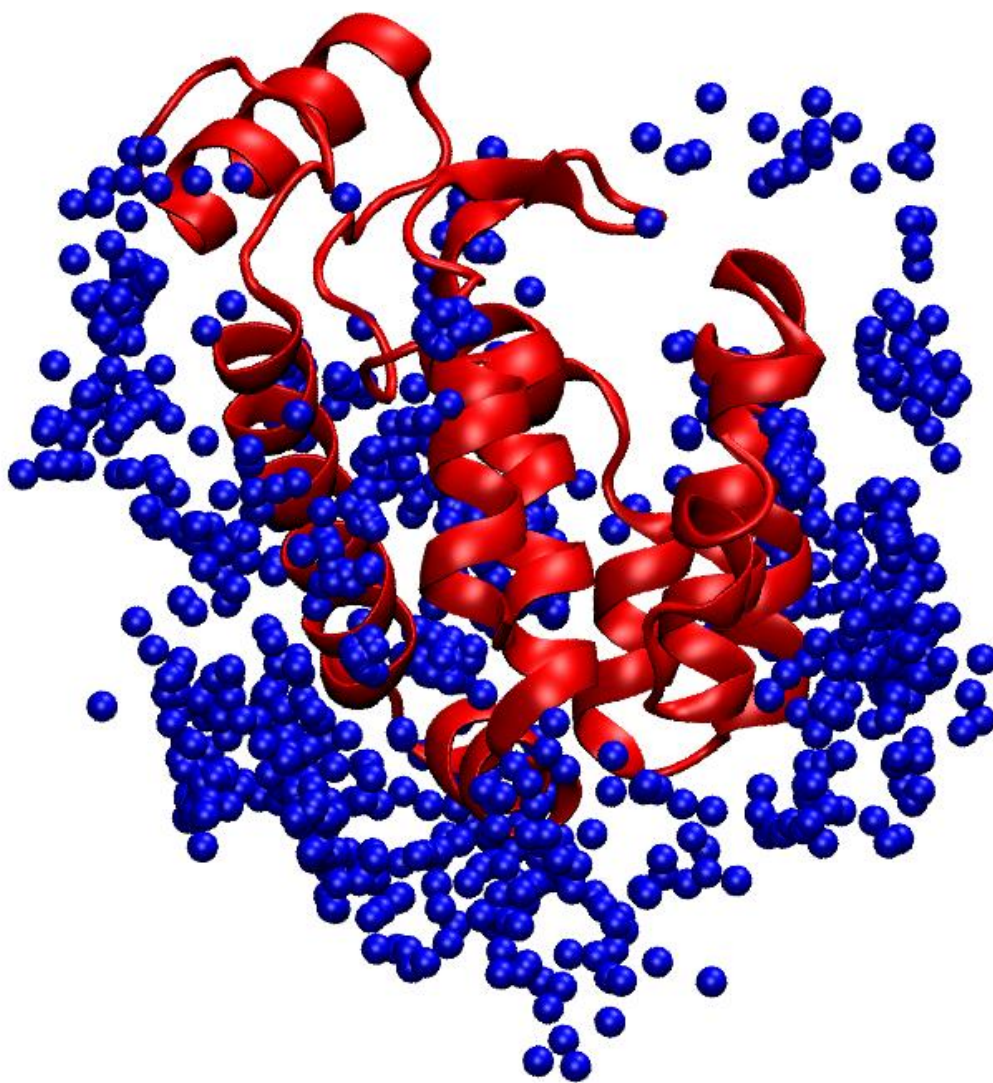



**Figure S18.** Difference in spin-spin distance histograms between experiment and RE simulations conducted with the spin label side chain (green line) and ON dummy atom (black)

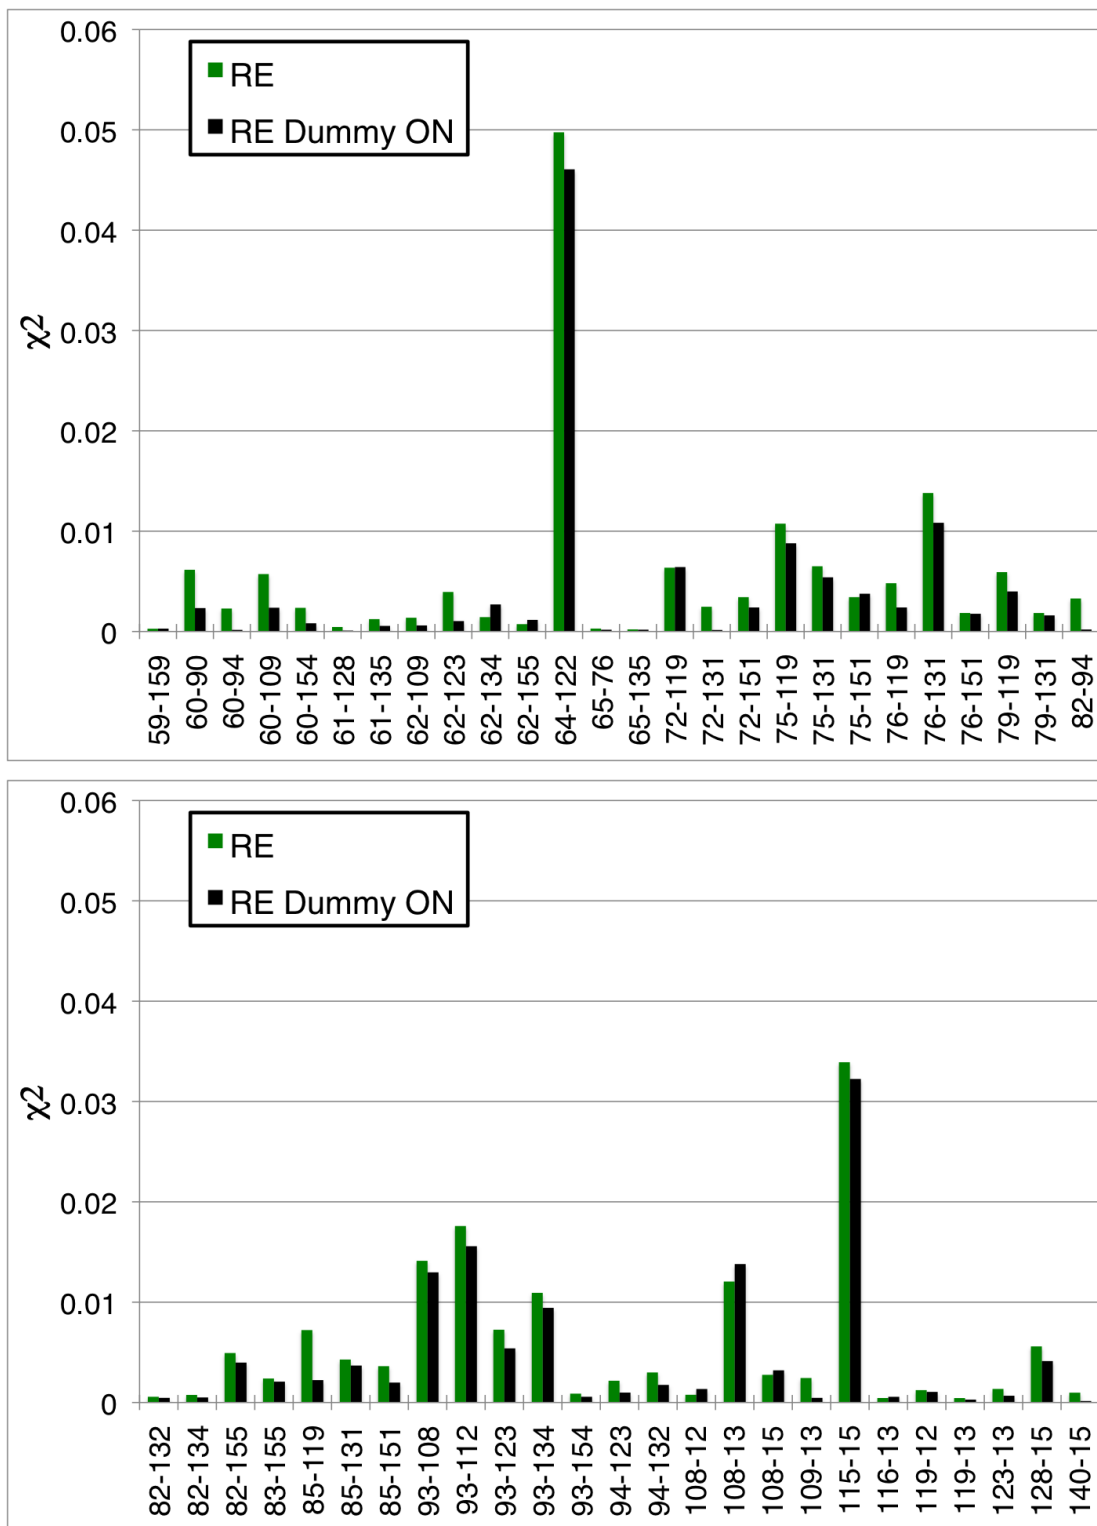

**Figure S19.** Cartoon representation of five distorted T4L structures, which were not able to be refined with RE simulation. The distorted area of the structures are colored in yellow and the undistorted area is colored in purple. The numbers in each of these structures represent the number of helices that are distorted.

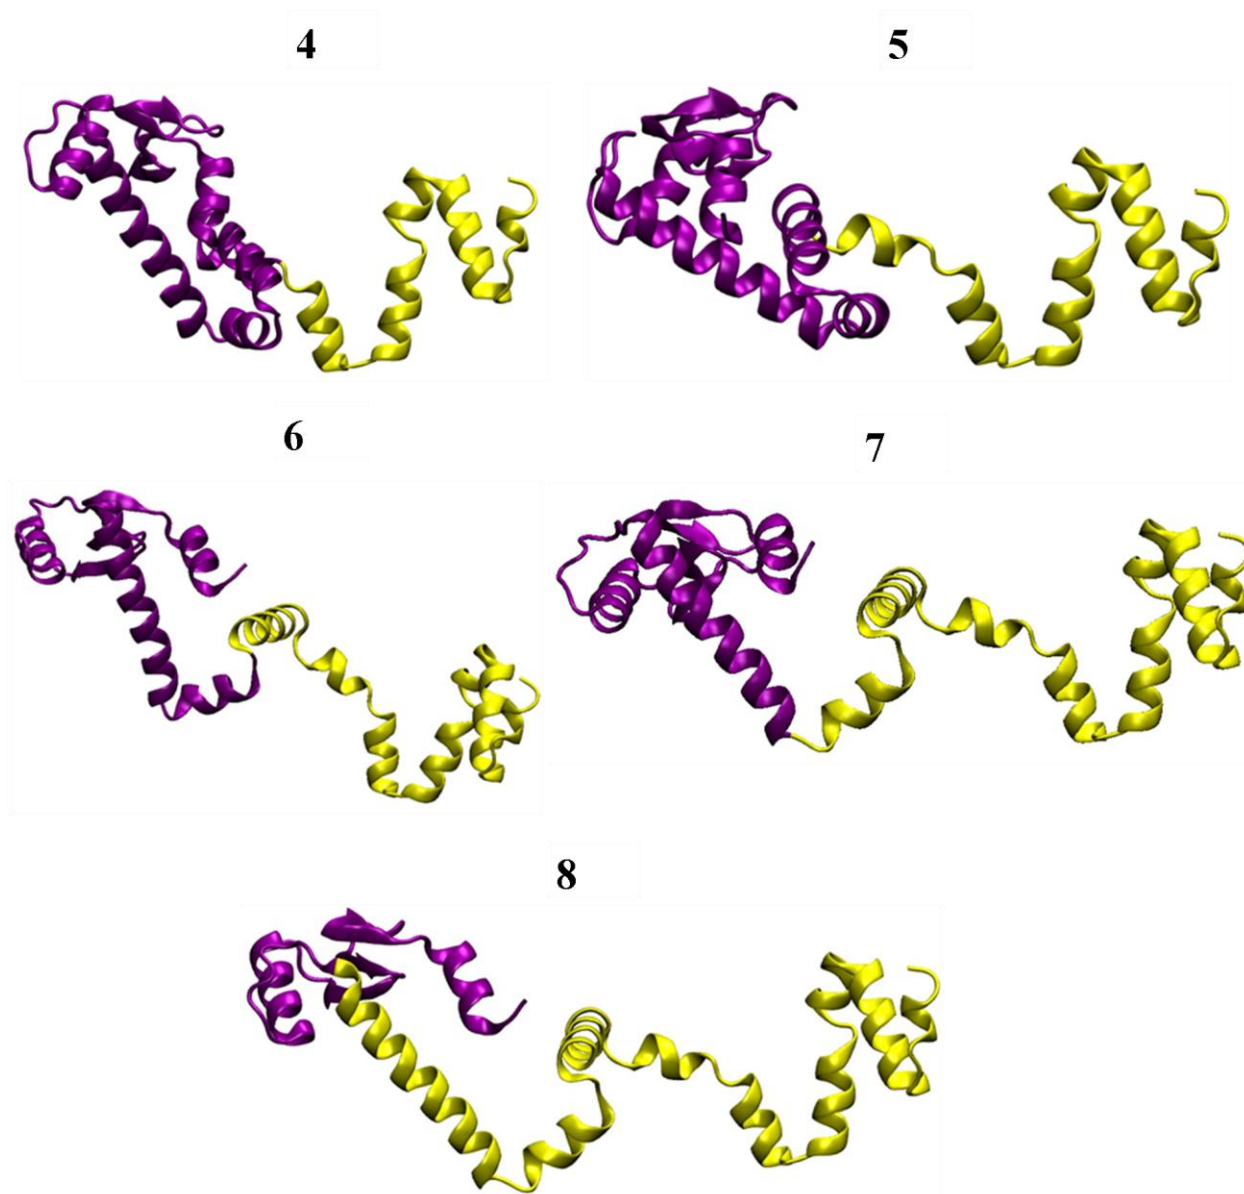

**Figure S20.** Root mean square deviation of backbone atoms of the distorted residues in T4L, shown in Figure S23, with respect to the X-ray structure obtained from NOE and RE simulations colored in black and blue, respectively.

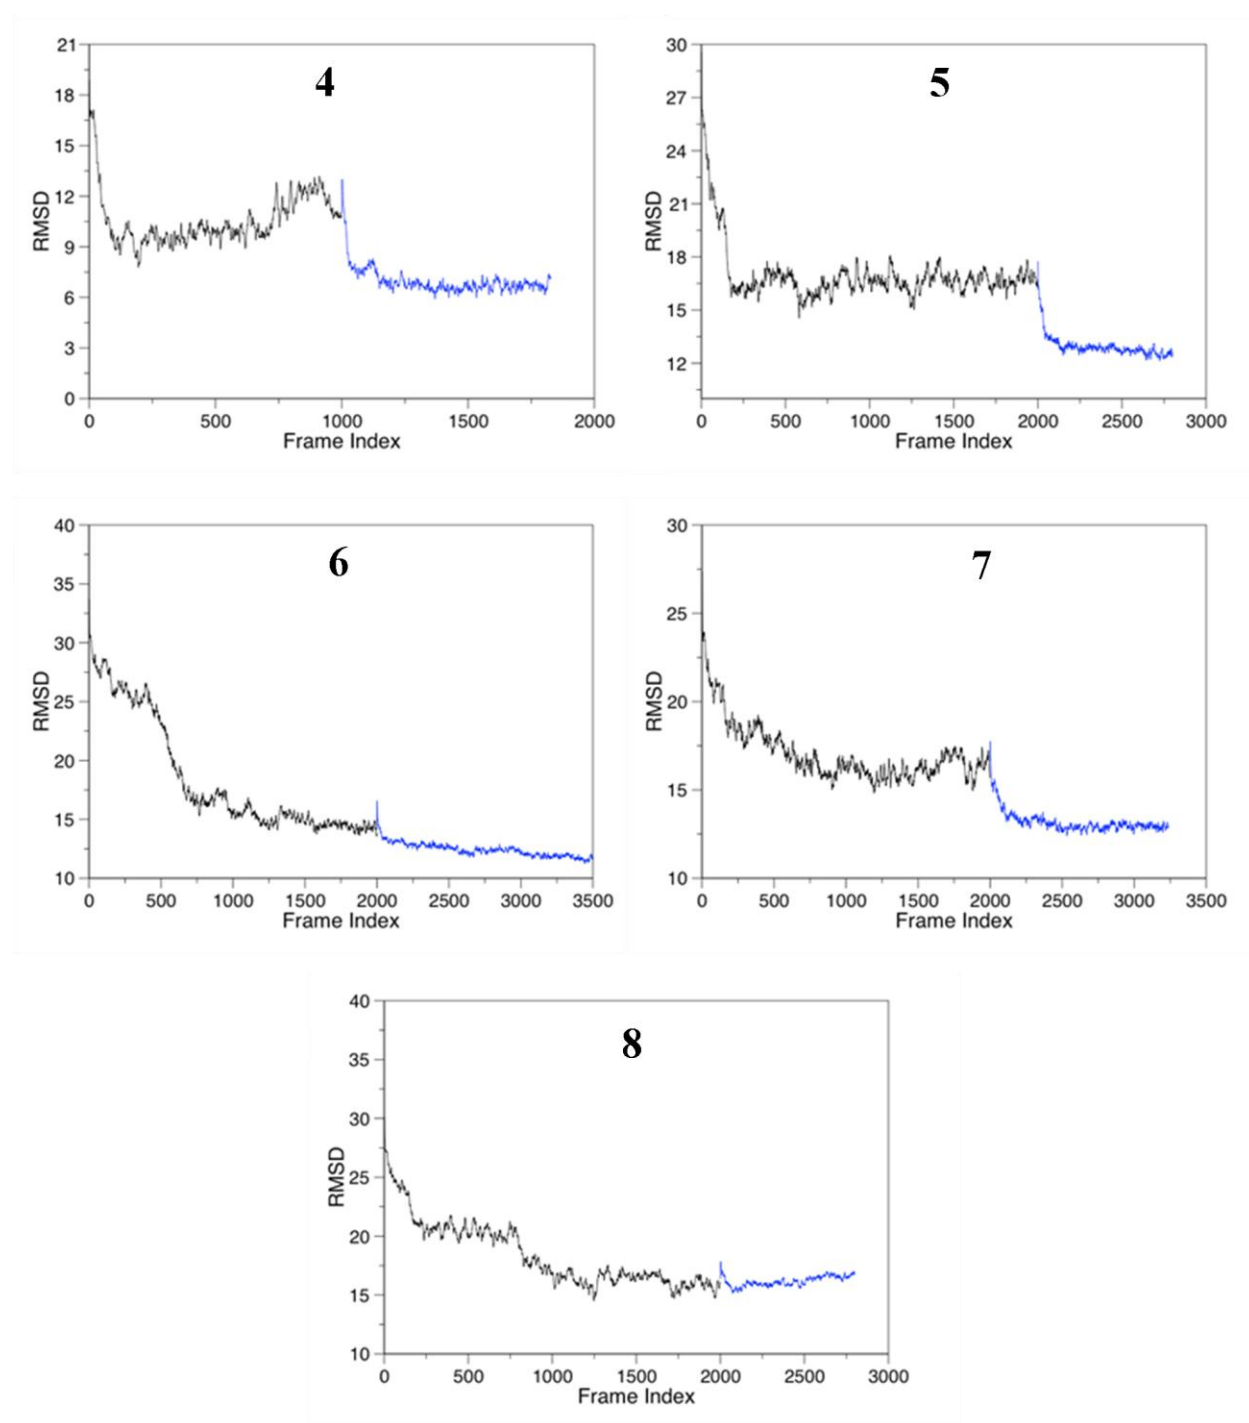

**Table S2.** Experimental ESP/DEER distance distribution data which are simultaneously used in the RE simulation. These distance distributions are normalized to 1.

|               |               |  |
|---------------|---------------|--|
| 108           | 123           |  |
| 1.000000e+000 | 0.000000e+000 |  |
| 2.000000e+000 | 0.000000e+000 |  |
| 3.000000e+000 | 0.000000e+000 |  |
| 4.000000e+000 | 0.000000e+000 |  |
| 5.000000e+000 | 0.000000e+000 |  |
| 6.000000e+000 | 0.000000e+000 |  |
| 7.000000e+000 | 0.000000e+000 |  |
| 8.000000e+000 | 0.000000e+000 |  |
| 9.000000e+000 | 0.000000e+000 |  |
| 1.000000e+001 | 0.000000e+000 |  |
| 1.100000e+001 | 0.000000e+000 |  |
| 1.200000e+001 | 0.000000e+000 |  |
| 1.300000e+001 | 0.000000e+000 |  |
| 1.400000e+001 | 0.000000e+000 |  |
| 1.500000e+001 | 0.000000e+000 |  |
| 1.600000e+001 | 0.000000e+000 |  |
| 1.700000e+001 | 0.000000e+000 |  |
| 1.800000e+001 | 0.000000e+000 |  |
| 1.900000e+001 | 0.000000e+000 |  |
| 2.000000e+001 | 0.000000e+000 |  |
| 2.100000e+001 | 2.622869e-004 |  |
| 2.200000e+001 | 8.536026e-003 |  |
| 2.300000e+001 | 3.285770e-002 |  |
| 2.400000e+001 | 6.590217e-002 |  |
| 2.500000e+001 | 1.011810e-001 |  |
| 2.600000e+001 | 1.343203e-001 |  |
| 2.700000e+001 | 1.517339e-001 |  |
| 2.800000e+001 | 1.477354e-001 |  |
| 2.900000e+001 | 1.290671e-001 |  |
| 3.000000e+001 | 1.007966e-001 |  |
| 3.100000e+001 | 7.339253e-002 |  |
| 3.200000e+001 | 4.252150e-002 |  |
| 3.300000e+001 | 1.169338e-002 |  |
| 3.400000e+001 | 0.000000e+000 |  |
| 3.500000e+001 | 0.000000e+000 |  |
| 3.600000e+001 | 0.000000e+000 |  |
| 3.700000e+001 | 0.000000e+000 |  |
| 3.800000e+001 | 0.000000e+000 |  |
| 3.900000e+001 | 0.000000e+000 |  |
| 4.000000e+001 | 0.000000e+000 |  |
| 4.100000e+001 | 0.000000e+000 |  |
| 4.200000e+001 | 0.000000e+000 |  |
| 4.300000e+001 | 0.000000e+000 |  |
| 4.400000e+001 | 0.000000e+000 |  |
| 4.500000e+001 | 0.000000e+000 |  |
| 4.600000e+001 | 0.000000e+000 |  |
| 4.700000e+001 | 0.000000e+000 |  |
| 4.800000e+001 | 0.000000e+000 |  |

|               |               |
|---------------|---------------|
| 4.900000e+001 | 0.000000e+000 |
| 5.000000e+001 | 0.000000e+000 |
| 5.100000e+001 | 0.000000e+000 |
| 5.200000e+001 | 0.000000e+000 |
| 5.300000e+001 | 0.000000e+000 |
| 5.400000e+001 | 0.000000e+000 |
| 5.500000e+001 | 0.000000e+000 |
| 5.600000e+001 | 0.000000e+000 |
| 5.700000e+001 | 0.000000e+000 |
| 5.800000e+001 | 0.000000e+000 |
| 5.900000e+001 | 0.000000e+000 |
| 6.000000e+001 | 0.000000e+000 |
| 108 134       |               |
| 1.000000e+000 | 0.000000e+000 |
| 2.000000e+000 | 0.000000e+000 |
| 3.000000e+000 | 0.000000e+000 |
| 4.000000e+000 | 0.000000e+000 |
| 5.000000e+000 | 0.000000e+000 |
| 6.000000e+000 | 0.000000e+000 |
| 7.000000e+000 | 0.000000e+000 |
| 8.000000e+000 | 0.000000e+000 |
| 9.000000e+000 | 0.000000e+000 |
| 1.000000e+001 | 0.000000e+000 |
| 1.100000e+001 | 0.000000e+000 |
| 1.200000e+001 | 0.000000e+000 |
| 1.300000e+001 | 0.000000e+000 |
| 1.400000e+001 | 0.000000e+000 |
| 1.500000e+001 | 0.000000e+000 |
| 1.600000e+001 | 0.000000e+000 |
| 1.700000e+001 | 0.000000e+000 |
| 1.800000e+001 | 0.000000e+000 |
| 1.900000e+001 | 0.000000e+000 |
| 2.000000e+001 | 0.000000e+000 |
| 2.100000e+001 | 0.000000e+000 |
| 2.200000e+001 | 0.000000e+000 |
| 2.300000e+001 | 0.000000e+000 |
| 2.400000e+001 | 0.000000e+000 |
| 2.500000e+001 | 0.000000e+000 |
| 2.600000e+001 | 3.570754e-003 |
| 2.700000e+001 | 0.000000e+000 |
| 2.800000e+001 | 1.208989e-003 |
| 2.900000e+001 | 1.493828e-002 |
| 3.000000e+001 | 4.221139e-002 |
| 3.100000e+001 | 1.223951e-001 |
| 3.200000e+001 | 2.833006e-001 |
| 3.300000e+001 | 3.666867e-001 |
| 3.400000e+001 | 1.656882e-001 |
| 3.500000e+001 | 0.000000e+000 |
| 3.600000e+001 | 0.000000e+000 |
| 3.700000e+001 | 0.000000e+000 |
| 3.800000e+001 | 0.000000e+000 |
| 3.900000e+001 | 0.000000e+000 |
| 4.000000e+001 | 0.000000e+000 |
| 4.100000e+001 | 0.000000e+000 |



|               |               |
|---------------|---------------|
| 4.200000e+001 | 0.000000e+000 |
| 4.300000e+001 | 0.000000e+000 |
| 4.400000e+001 | 0.000000e+000 |
| 4.500000e+001 | 0.000000e+000 |
| 4.600000e+001 | 0.000000e+000 |
| 4.700000e+001 | 0.000000e+000 |
| 4.800000e+001 | 0.000000e+000 |
| 4.900000e+001 | 0.000000e+000 |
| 5.000000e+001 | 0.000000e+000 |
| 5.100000e+001 | 0.000000e+000 |
| 5.200000e+001 | 0.000000e+000 |
| 5.300000e+001 | 0.000000e+000 |
| 5.400000e+001 | 0.000000e+000 |
| 5.500000e+001 | 0.000000e+000 |
| 5.600000e+001 | 0.000000e+000 |
| 5.700000e+001 | 0.000000e+000 |
| 5.800000e+001 | 0.000000e+000 |
| 5.900000e+001 | 0.000000e+000 |
| 6.000000e+001 | 0.000000e+000 |
| 108 155       |               |
| 1.000000e+000 | 0.000000e+000 |
| 2.000000e+000 | 0.000000e+000 |
| 3.000000e+000 | 0.000000e+000 |
| 4.000000e+000 | 0.000000e+000 |
| 5.000000e+000 | 0.000000e+000 |
| 6.000000e+000 | 0.000000e+000 |
| 7.000000e+000 | 0.000000e+000 |
| 8.000000e+000 | 0.000000e+000 |
| 9.000000e+000 | 0.000000e+000 |
| 1.000000e+001 | 0.000000e+000 |
| 1.100000e+001 | 0.000000e+000 |
| 1.200000e+001 | 0.000000e+000 |
| 1.300000e+001 | 0.000000e+000 |
| 1.400000e+001 | 0.000000e+000 |
| 1.500000e+001 | 0.000000e+000 |
| 1.600000e+001 | 0.000000e+000 |
| 1.700000e+001 | 0.000000e+000 |
| 1.800000e+001 | 0.000000e+000 |
| 1.900000e+001 | 0.000000e+000 |
| 2.000000e+001 | 0.000000e+000 |
| 2.100000e+001 | 0.000000e+000 |
| 2.200000e+001 | 0.000000e+000 |
| 2.300000e+001 | 0.000000e+000 |
| 2.400000e+001 | 0.000000e+000 |
| 2.500000e+001 | 0.000000e+000 |
| 2.600000e+001 | 0.000000e+000 |
| 2.700000e+001 | 8.195755e-003 |
| 2.800000e+001 | 2.160165e-002 |
| 2.900000e+001 | 1.997853e-002 |
| 3.000000e+001 | 1.260742e-002 |
| 3.100000e+001 | 7.206853e-004 |
| 3.200000e+001 | 1.810249e-002 |
| 3.300000e+001 | 7.368682e-002 |
| 3.400000e+001 | 1.322405e-001 |

|               |               |
|---------------|---------------|
| 3.500000e+001 | 1.841630e-001 |
| 3.600000e+001 | 2.202442e-001 |
| 3.700000e+001 | 1.973495e-001 |
| 3.800000e+001 | 9.992995e-002 |
| 3.900000e+001 | 1.117958e-002 |
| 4.000000e+001 | 0.000000e+000 |
| 4.100000e+001 | 0.000000e+000 |
| 4.200000e+001 | 0.000000e+000 |
| 4.300000e+001 | 0.000000e+000 |
| 4.400000e+001 | 0.000000e+000 |
| 4.500000e+001 | 0.000000e+000 |
| 4.600000e+001 | 0.000000e+000 |
| 4.700000e+001 | 0.000000e+000 |
| 4.800000e+001 | 0.000000e+000 |
| 4.900000e+001 | 0.000000e+000 |
| 5.000000e+001 | 0.000000e+000 |
| 5.100000e+001 | 0.000000e+000 |
| 5.200000e+001 | 0.000000e+000 |
| 5.300000e+001 | 0.000000e+000 |
| 5.400000e+001 | 0.000000e+000 |
| 5.500000e+001 | 0.000000e+000 |
| 5.600000e+001 | 0.000000e+000 |
| 5.700000e+001 | 0.000000e+000 |
| 5.800000e+001 | 0.000000e+000 |
| 5.900000e+001 | 0.000000e+000 |
| 6.000000e+001 | 0.000000e+000 |
| 109 134       |               |
| 1.000000e+000 | 0.000000e+000 |
| 2.000000e+000 | 0.000000e+000 |
| 3.000000e+000 | 0.000000e+000 |
| 4.000000e+000 | 0.000000e+000 |
| 5.000000e+000 | 0.000000e+000 |
| 6.000000e+000 | 0.000000e+000 |
| 7.000000e+000 | 0.000000e+000 |
| 8.000000e+000 | 0.000000e+000 |
| 9.000000e+000 | 0.000000e+000 |
| 1.000000e+001 | 0.000000e+000 |
| 1.100000e+001 | 0.000000e+000 |
| 1.200000e+001 | 0.000000e+000 |
| 1.300000e+001 | 0.000000e+000 |
| 1.400000e+001 | 0.000000e+000 |
| 1.500000e+001 | 6.972117e-004 |
| 1.600000e+001 | 5.310759e-003 |
| 1.700000e+001 | 3.312985e-003 |
| 1.800000e+001 | 2.654528e-004 |
| 1.900000e+001 | 4.484904e-004 |
| 2.000000e+001 | 5.077073e-003 |
| 2.100000e+001 | 1.131025e-003 |
| 2.200000e+001 | 0.000000e+000 |
| 2.300000e+001 | 0.000000e+000 |
| 2.400000e+001 | 0.000000e+000 |
| 2.500000e+001 | 3.619227e-003 |
| 2.600000e+001 | 2.571315e-002 |
| 2.700000e+001 | 3.781282e-002 |

|               |               |
|---------------|---------------|
| 2.800000e+001 | 5.373939e-002 |
| 2.900000e+001 | 1.132609e-001 |
| 3.000000e+001 | 1.997153e-001 |
| 3.100000e+001 | 2.312427e-001 |
| 3.200000e+001 | 1.727081e-001 |
| 3.300000e+001 | 7.932947e-002 |
| 3.400000e+001 | 2.017900e-002 |
| 3.500000e+001 | 8.900600e-003 |
| 3.600000e+001 | 1.372302e-002 |
| 3.700000e+001 | 1.050609e-002 |
| 3.800000e+001 | 2.770480e-003 |
| 3.900000e+001 | 0.000000e+000 |
| 4.000000e+001 | 2.485568e-003 |
| 4.100000e+001 | 5.013188e-003 |
| 4.200000e+001 | 3.038054e-003 |
| 4.300000e+001 | 0.000000e+000 |
| 4.400000e+001 | 0.000000e+000 |
| 4.500000e+001 | 0.000000e+000 |
| 4.600000e+001 | 0.000000e+000 |
| 4.700000e+001 | 0.000000e+000 |
| 4.800000e+001 | 0.000000e+000 |
| 4.900000e+001 | 0.000000e+000 |
| 5.000000e+001 | 0.000000e+000 |
| 5.100000e+001 | 0.000000e+000 |
| 5.200000e+001 | 0.000000e+000 |
| 5.300000e+001 | 0.000000e+000 |
| 5.400000e+001 | 0.000000e+000 |
| 5.500000e+001 | 0.000000e+000 |
| 5.600000e+001 | 0.000000e+000 |
| 5.700000e+001 | 0.000000e+000 |
| 5.800000e+001 | 0.000000e+000 |
| 5.900000e+001 | 0.000000e+000 |
| 6.000000e+001 | 0.000000e+000 |
| 60 109        |               |
| 1.000000e+000 | 0.000000e+000 |
| 2.000000e+000 | 0.000000e+000 |
| 3.000000e+000 | 0.000000e+000 |
| 4.000000e+000 | 0.000000e+000 |
| 5.000000e+000 | 0.000000e+000 |
| 6.000000e+000 | 0.000000e+000 |
| 7.000000e+000 | 0.000000e+000 |
| 8.000000e+000 | 0.000000e+000 |
| 9.000000e+000 | 0.000000e+000 |
| 1.000000e+001 | 0.000000e+000 |
| 1.100000e+001 | 0.000000e+000 |
| 1.200000e+001 | 0.000000e+000 |
| 1.300000e+001 | 0.000000e+000 |
| 1.400000e+001 | 0.000000e+000 |
| 1.500000e+001 | 0.000000e+000 |
| 1.600000e+001 | 2.154977e-004 |
| 1.700000e+001 | 0.000000e+000 |
| 1.800000e+001 | 0.000000e+000 |
| 1.900000e+001 | 0.000000e+000 |
| 2.000000e+001 | 0.000000e+000 |

|               |               |
|---------------|---------------|
| 2.100000e+001 | 0.000000e+000 |
| 2.200000e+001 | 0.000000e+000 |
| 2.300000e+001 | 4.889178e-005 |
| 2.400000e+001 | 0.000000e+000 |
| 2.500000e+001 | 0.000000e+000 |
| 2.600000e+001 | 0.000000e+000 |
| 2.700000e+001 | 0.000000e+000 |
| 2.800000e+001 | 3.170715e-003 |
| 2.900000e+001 | 7.971327e-003 |
| 3.000000e+001 | 4.460099e-003 |
| 3.100000e+001 | 0.000000e+000 |
| 3.200000e+001 | 5.362632e-002 |
| 3.300000e+001 | 1.806570e-001 |
| 3.400000e+001 | 2.559219e-001 |
| 3.500000e+001 | 2.099625e-001 |
| 3.600000e+001 | 9.926005e-002 |
| 3.700000e+001 | 1.597780e-002 |
| 3.800000e+001 | 7.753613e-004 |
| 3.900000e+001 | 3.437040e-002 |
| 4.000000e+001 | 6.557382e-002 |
| 4.100000e+001 | 5.344758e-002 |
| 4.200000e+001 | 1.456084e-002 |
| 4.300000e+001 | 0.000000e+000 |
| 4.400000e+001 | 0.000000e+000 |
| 4.500000e+001 | 0.000000e+000 |
| 4.600000e+001 | 0.000000e+000 |
| 4.700000e+001 | 0.000000e+000 |
| 4.800000e+001 | 0.000000e+000 |
| 4.900000e+001 | 0.000000e+000 |
| 5.000000e+001 | 0.000000e+000 |
| 5.100000e+001 | 0.000000e+000 |
| 5.200000e+001 | 0.000000e+000 |
| 5.300000e+001 | 0.000000e+000 |
| 5.400000e+001 | 0.000000e+000 |
| 5.500000e+001 | 0.000000e+000 |
| 5.600000e+001 | 0.000000e+000 |
| 5.700000e+001 | 0.000000e+000 |
| 5.800000e+001 | 0.000000e+000 |
| 5.900000e+001 | 0.000000e+000 |
| 6.000000e+001 | 0.000000e+000 |
| 60 154        |               |
| 1.000000e+000 | 0.000000e+000 |
| 2.000000e+000 | 0.000000e+000 |
| 3.000000e+000 | 0.000000e+000 |
| 4.000000e+000 | 0.000000e+000 |
| 5.000000e+000 | 0.000000e+000 |
| 6.000000e+000 | 0.000000e+000 |
| 7.000000e+000 | 0.000000e+000 |
| 8.000000e+000 | 0.000000e+000 |
| 9.000000e+000 | 0.000000e+000 |
| 1.000000e+001 | 0.000000e+000 |
| 1.100000e+001 | 0.000000e+000 |
| 1.200000e+001 | 0.000000e+000 |
| 1.300000e+001 | 0.000000e+000 |

|               |               |
|---------------|---------------|
| 1.400000e+001 | 0.000000e+000 |
| 1.500000e+001 | 0.000000e+000 |
| 1.600000e+001 | 0.000000e+000 |
| 1.700000e+001 | 0.000000e+000 |
| 1.800000e+001 | 0.000000e+000 |
| 1.900000e+001 | 0.000000e+000 |
| 2.000000e+001 | 1.640437e-006 |
| 2.100000e+001 | 3.866948e-006 |
| 2.200000e+001 | 4.370540e-006 |
| 2.300000e+001 | 0.000000e+000 |
| 2.400000e+001 | 4.846403e-004 |
| 2.500000e+001 | 1.075614e-004 |
| 2.600000e+001 | 8.068787e-004 |
| 2.700000e+001 | 3.391603e-003 |
| 2.800000e+001 | 6.676969e-003 |
| 2.900000e+001 | 1.298594e-002 |
| 3.000000e+001 | 2.400427e-002 |
| 3.100000e+001 | 4.434710e-002 |
| 3.200000e+001 | 8.906849e-002 |
| 3.300000e+001 | 1.591773e-001 |
| 3.400000e+001 | 2.117683e-001 |
| 3.500000e+001 | 2.081771e-001 |
| 3.600000e+001 | 1.497652e-001 |
| 3.700000e+001 | 7.313053e-002 |
| 3.800000e+001 | 1.609816e-002 |
| 3.900000e+001 | 0.000000e+000 |
| 4.000000e+001 | 0.000000e+000 |
| 4.100000e+001 | 0.000000e+000 |
| 4.200000e+001 | 0.000000e+000 |
| 4.300000e+001 | 0.000000e+000 |
| 4.400000e+001 | 0.000000e+000 |
| 4.500000e+001 | 0.000000e+000 |
| 4.600000e+001 | 0.000000e+000 |
| 4.700000e+001 | 0.000000e+000 |
| 4.800000e+001 | 0.000000e+000 |
| 4.900000e+001 | 0.000000e+000 |
| 5.000000e+001 | 0.000000e+000 |
| 5.100000e+001 | 0.000000e+000 |
| 5.200000e+001 | 0.000000e+000 |
| 5.300000e+001 | 0.000000e+000 |
| 5.400000e+001 | 0.000000e+000 |
| 5.500000e+001 | 0.000000e+000 |
| 5.600000e+001 | 0.000000e+000 |
| 5.700000e+001 | 0.000000e+000 |
| 5.800000e+001 | 0.000000e+000 |
| 5.900000e+001 | 0.000000e+000 |
| 6.000000e+001 | 0.000000e+000 |
| 60 94         |               |
| 1.000000e+000 | 0.000000e+000 |
| 2.000000e+000 | 0.000000e+000 |
| 3.000000e+000 | 0.000000e+000 |
| 4.000000e+000 | 0.000000e+000 |
| 5.000000e+000 | 0.000000e+000 |
| 6.000000e+000 | 0.000000e+000 |



|               |               |
|---------------|---------------|
| 7.000000e+000 | 0.000000e+000 |
| 8.000000e+000 | 0.000000e+000 |
| 9.000000e+000 | 0.000000e+000 |
| 1.000000e+001 | 0.000000e+000 |
| 1.100000e+001 | 0.000000e+000 |
| 1.200000e+001 | 0.000000e+000 |
| 1.300000e+001 | 0.000000e+000 |
| 1.400000e+001 | 0.000000e+000 |
| 1.500000e+001 | 0.000000e+000 |
| 1.600000e+001 | 8.171571e-005 |
| 1.700000e+001 | 3.833441e-003 |
| 1.800000e+001 | 1.173254e-002 |
| 1.900000e+001 | 1.971317e-002 |
| 2.000000e+001 | 2.885033e-002 |
| 2.100000e+001 | 3.841956e-002 |
| 2.200000e+001 | 5.124178e-002 |
| 2.300000e+001 | 7.794293e-002 |
| 2.400000e+001 | 1.190074e-001 |
| 2.500000e+001 | 1.477113e-001 |
| 2.600000e+001 | 1.435194e-001 |
| 2.700000e+001 | 1.143891e-001 |
| 2.800000e+001 | 8.356855e-002 |
| 2.900000e+001 | 5.723453e-002 |
| 3.000000e+001 | 3.773806e-002 |
| 3.100000e+001 | 2.869944e-002 |
| 3.200000e+001 | 2.093146e-002 |
| 3.300000e+001 | 9.722957e-003 |
| 3.400000e+001 | 1.799171e-003 |
| 3.500000e+001 | 1.041504e-003 |
| 3.600000e+001 | 2.087957e-003 |
| 3.700000e+001 | 7.338121e-004 |
| 3.800000e+001 | 0.000000e+000 |
| 3.900000e+001 | 0.000000e+000 |
| 4.000000e+001 | 0.000000e+000 |
| 4.100000e+001 | 0.000000e+000 |
| 4.200000e+001 | 0.000000e+000 |
| 4.300000e+001 | 0.000000e+000 |
| 4.400000e+001 | 0.000000e+000 |
| 4.500000e+001 | 0.000000e+000 |
| 4.600000e+001 | 0.000000e+000 |
| 4.700000e+001 | 0.000000e+000 |
| 4.800000e+001 | 0.000000e+000 |
| 4.900000e+001 | 0.000000e+000 |
| 5.000000e+001 | 0.000000e+000 |
| 5.100000e+001 | 0.000000e+000 |
| 5.200000e+001 | 0.000000e+000 |
| 5.300000e+001 | 0.000000e+000 |
| 5.400000e+001 | 0.000000e+000 |
| 5.500000e+001 | 0.000000e+000 |
| 5.600000e+001 | 0.000000e+000 |
| 5.700000e+001 | 0.000000e+000 |
| 5.800000e+001 | 0.000000e+000 |
| 5.900000e+001 | 0.000000e+000 |
| 6.000000e+001 | 0.000000e+000 |

62 109

|               |               |
|---------------|---------------|
| 1.000000e+000 | 0.000000e+000 |
| 2.000000e+000 | 0.000000e+000 |
| 3.000000e+000 | 0.000000e+000 |
| 4.000000e+000 | 0.000000e+000 |
| 5.000000e+000 | 0.000000e+000 |
| 6.000000e+000 | 0.000000e+000 |
| 7.000000e+000 | 0.000000e+000 |
| 8.000000e+000 | 0.000000e+000 |
| 9.000000e+000 | 0.000000e+000 |
| 1.000000e+001 | 0.000000e+000 |
| 1.100000e+001 | 0.000000e+000 |
| 1.200000e+001 | 0.000000e+000 |
| 1.300000e+001 | 0.000000e+000 |
| 1.400000e+001 | 0.000000e+000 |
| 1.500000e+001 | 3.569708e-004 |
| 1.600000e+001 | 1.229265e-004 |
| 1.700000e+001 | 0.000000e+000 |
| 1.800000e+001 | 0.000000e+000 |
| 1.900000e+001 | 0.000000e+000 |
| 2.000000e+001 | 0.000000e+000 |
| 2.100000e+001 | 0.000000e+000 |
| 2.200000e+001 | 0.000000e+000 |
| 2.300000e+001 | 2.134013e-003 |
| 2.400000e+001 | 1.085960e-002 |
| 2.500000e+001 | 2.523651e-002 |
| 2.600000e+001 | 5.302792e-002 |
| 2.700000e+001 | 1.038971e-001 |
| 2.800000e+001 | 1.688459e-001 |
| 2.900000e+001 | 2.002041e-001 |
| 3.000000e+001 | 1.705518e-001 |
| 3.100000e+001 | 9.754447e-002 |
| 3.200000e+001 | 3.337254e-002 |
| 3.300000e+001 | 1.776734e-002 |
| 3.400000e+001 | 3.631560e-002 |
| 3.500000e+001 | 4.510899e-002 |
| 3.600000e+001 | 2.773675e-002 |
| 3.700000e+001 | 5.828877e-003 |
| 3.800000e+001 | 0.000000e+000 |
| 3.900000e+001 | 0.000000e+000 |
| 4.000000e+001 | 3.500124e-004 |
| 4.100000e+001 | 7.181304e-004 |
| 4.200000e+001 | 2.035779e-005 |
| 4.300000e+001 | 0.000000e+000 |
| 4.400000e+001 | 0.000000e+000 |
| 4.500000e+001 | 0.000000e+000 |
| 4.600000e+001 | 0.000000e+000 |
| 4.700000e+001 | 0.000000e+000 |
| 4.800000e+001 | 0.000000e+000 |
| 4.900000e+001 | 0.000000e+000 |
| 5.000000e+001 | 0.000000e+000 |
| 5.100000e+001 | 0.000000e+000 |
| 5.200000e+001 | 0.000000e+000 |
| 5.300000e+001 | 0.000000e+000 |

|               |               |
|---------------|---------------|
| 5.400000e+001 | 0.000000e+000 |
| 5.500000e+001 | 0.000000e+000 |
| 5.600000e+001 | 0.000000e+000 |
| 5.700000e+001 | 0.000000e+000 |
| 5.800000e+001 | 0.000000e+000 |
| 5.900000e+001 | 0.000000e+000 |
| 6.000000e+001 | 0.000000e+000 |
| 62 123        |               |
| 1.000000e+000 | 0.000000e+000 |
| 2.000000e+000 | 0.000000e+000 |
| 3.000000e+000 | 0.000000e+000 |
| 4.000000e+000 | 0.000000e+000 |
| 5.000000e+000 | 0.000000e+000 |
| 6.000000e+000 | 0.000000e+000 |
| 7.000000e+000 | 0.000000e+000 |
| 8.000000e+000 | 0.000000e+000 |
| 9.000000e+000 | 0.000000e+000 |
| 1.000000e+001 | 0.000000e+000 |
| 1.100000e+001 | 0.000000e+000 |
| 1.200000e+001 | 0.000000e+000 |
| 1.300000e+001 | 0.000000e+000 |
| 1.400000e+001 | 0.000000e+000 |
| 1.500000e+001 | 0.000000e+000 |
| 1.600000e+001 | 0.000000e+000 |
| 1.700000e+001 | 0.000000e+000 |
| 1.800000e+001 | 0.000000e+000 |
| 1.900000e+001 | 0.000000e+000 |
| 2.000000e+001 | 0.000000e+000 |
| 2.100000e+001 | 0.000000e+000 |
| 2.200000e+001 | 0.000000e+000 |
| 2.300000e+001 | 0.000000e+000 |
| 2.400000e+001 | 0.000000e+000 |
| 2.500000e+001 | 0.000000e+000 |
| 2.600000e+001 | 0.000000e+000 |
| 2.700000e+001 | 0.000000e+000 |
| 2.800000e+001 | 0.000000e+000 |
| 2.900000e+001 | 0.000000e+000 |
| 3.000000e+001 | 0.000000e+000 |
| 3.100000e+001 | 0.000000e+000 |
| 3.200000e+001 | 0.000000e+000 |
| 3.300000e+001 | 0.000000e+000 |
| 3.400000e+001 | 0.000000e+000 |
| 3.500000e+001 | 0.000000e+000 |
| 3.600000e+001 | 0.000000e+000 |
| 3.700000e+001 | 8.967432e-003 |
| 3.800000e+001 | 5.508339e-002 |
| 3.900000e+001 | 1.166408e-001 |
| 4.000000e+001 | 1.603444e-001 |
| 4.100000e+001 | 1.671713e-001 |
| 4.200000e+001 | 1.376827e-001 |
| 4.300000e+001 | 9.235395e-002 |
| 4.400000e+001 | 5.060265e-002 |
| 4.500000e+001 | 2.666570e-002 |
| 4.600000e+001 | 2.515090e-002 |

|               |               |
|---------------|---------------|
| 4.700000e+001 | 3.617852e-002 |
| 4.800000e+001 | 4.540172e-002 |
| 4.900000e+001 | 4.257182e-002 |
| 5.000000e+001 | 2.653325e-002 |
| 5.100000e+001 | 8.300899e-003 |
| 5.200000e+001 | 3.506472e-004 |
| 5.300000e+001 | 0.000000e+000 |
| 5.400000e+001 | 0.000000e+000 |
| 5.500000e+001 | 0.000000e+000 |
| 5.600000e+001 | 0.000000e+000 |
| 5.700000e+001 | 0.000000e+000 |
| 5.800000e+001 | 0.000000e+000 |
| 5.900000e+001 | 0.000000e+000 |
| 6.000000e+001 | 0.000000e+000 |
| 62 134        |               |
| 1.000000e+000 | 0.000000e+000 |
| 2.000000e+000 | 0.000000e+000 |
| 3.000000e+000 | 0.000000e+000 |
| 4.000000e+000 | 0.000000e+000 |
| 5.000000e+000 | 0.000000e+000 |
| 6.000000e+000 | 0.000000e+000 |
| 7.000000e+000 | 0.000000e+000 |
| 8.000000e+000 | 0.000000e+000 |
| 9.000000e+000 | 0.000000e+000 |
| 1.000000e+001 | 0.000000e+000 |
| 1.100000e+001 | 0.000000e+000 |
| 1.200000e+001 | 0.000000e+000 |
| 1.300000e+001 | 0.000000e+000 |
| 1.400000e+001 | 0.000000e+000 |
| 1.500000e+001 | 0.000000e+000 |
| 1.600000e+001 | 0.000000e+000 |
| 1.700000e+001 | 0.000000e+000 |
| 1.800000e+001 | 0.000000e+000 |
| 1.900000e+001 | 0.000000e+000 |
| 2.000000e+001 | 0.000000e+000 |
| 2.100000e+001 | 0.000000e+000 |
| 2.200000e+001 | 0.000000e+000 |
| 2.300000e+001 | 0.000000e+000 |
| 2.400000e+001 | 0.000000e+000 |
| 2.500000e+001 | 0.000000e+000 |
| 2.600000e+001 | 0.000000e+000 |
| 2.700000e+001 | 0.000000e+000 |
| 2.800000e+001 | 0.000000e+000 |
| 2.900000e+001 | 0.000000e+000 |
| 3.000000e+001 | 0.000000e+000 |
| 3.100000e+001 | 0.000000e+000 |
| 3.200000e+001 | 0.000000e+000 |
| 3.300000e+001 | 0.000000e+000 |
| 3.400000e+001 | 0.000000e+000 |
| 3.500000e+001 | 0.000000e+000 |
| 3.600000e+001 | 0.000000e+000 |
| 3.700000e+001 | 0.000000e+000 |
| 3.800000e+001 | 2.453835e-002 |
| 3.900000e+001 | 1.289162e-001 |

|               |               |
|---------------|---------------|
| 4.000000e+001 | 2.232965e-001 |
| 4.100000e+001 | 2.459212e-001 |
| 4.200000e+001 | 2.003550e-001 |
| 4.300000e+001 | 1.212986e-001 |
| 4.400000e+001 | 4.813355e-002 |
| 4.500000e+001 | 7.468408e-003 |
| 4.600000e+001 | 0.000000e+000 |
| 4.700000e+001 | 0.000000e+000 |
| 4.800000e+001 | 0.000000e+000 |
| 4.900000e+001 | 0.000000e+000 |
| 5.000000e+001 | 0.000000e+000 |
| 5.100000e+001 | 0.000000e+000 |
| 5.200000e+001 | 0.000000e+000 |
| 5.300000e+001 | 0.000000e+000 |
| 5.400000e+001 | 0.000000e+000 |
| 5.500000e+001 | 0.000000e+000 |
| 5.600000e+001 | 0.000000e+000 |
| 5.700000e+001 | 0.000000e+000 |
| 5.800000e+001 | 0.000000e+000 |
| 5.900000e+001 | 0.000000e+000 |
| 6.000000e+001 | 0.000000e+000 |
| 62 155        |               |
| 1.000000e+000 | 0.000000e+000 |
| 2.000000e+000 | 0.000000e+000 |
| 3.000000e+000 | 0.000000e+000 |
| 4.000000e+000 | 0.000000e+000 |
| 5.000000e+000 | 0.000000e+000 |
| 6.000000e+000 | 0.000000e+000 |
| 7.000000e+000 | 0.000000e+000 |
| 8.000000e+000 | 0.000000e+000 |
| 9.000000e+000 | 0.000000e+000 |
| 1.000000e+001 | 0.000000e+000 |
| 1.100000e+001 | 0.000000e+000 |
| 1.200000e+001 | 0.000000e+000 |
| 1.300000e+001 | 0.000000e+000 |
| 1.400000e+001 | 0.000000e+000 |
| 1.500000e+001 | 0.000000e+000 |
| 1.600000e+001 | 0.000000e+000 |
| 1.700000e+001 | 0.000000e+000 |
| 1.800000e+001 | 0.000000e+000 |
| 1.900000e+001 | 0.000000e+000 |
| 2.000000e+001 | 0.000000e+000 |
| 2.100000e+001 | 0.000000e+000 |
| 2.200000e+001 | 0.000000e+000 |
| 2.300000e+001 | 0.000000e+000 |
| 2.400000e+001 | 0.000000e+000 |
| 2.500000e+001 | 0.000000e+000 |
| 2.600000e+001 | 0.000000e+000 |
| 2.700000e+001 | 0.000000e+000 |
| 2.800000e+001 | 0.000000e+000 |
| 2.900000e+001 | 0.000000e+000 |
| 3.000000e+001 | 0.000000e+000 |
| 3.100000e+001 | 0.000000e+000 |
| 3.200000e+001 | 0.000000e+000 |

|               |               |
|---------------|---------------|
| 3.300000e+001 | 0.000000e+000 |
| 3.400000e+001 | 0.000000e+000 |
| 3.500000e+001 | 0.000000e+000 |
| 3.600000e+001 | 0.000000e+000 |
| 3.700000e+001 | 0.000000e+000 |
| 3.800000e+001 | 2.082750e-002 |
| 3.900000e+001 | 1.023699e-001 |
| 4.000000e+001 | 2.019836e-001 |
| 4.100000e+001 | 2.528682e-001 |
| 4.200000e+001 | 2.200731e-001 |
| 4.300000e+001 | 1.383407e-001 |
| 4.400000e+001 | 5.544811e-002 |
| 4.500000e+001 | 7.560348e-003 |
| 4.600000e+001 | 0.000000e+000 |
| 4.700000e+001 | 0.000000e+000 |
| 4.800000e+001 | 7.080951e-007 |
| 4.900000e+001 | 6.152679e-006 |
| 5.000000e+001 | 0.000000e+000 |
| 5.100000e+001 | 0.000000e+000 |
| 5.200000e+001 | 0.000000e+000 |
| 5.300000e+001 | 0.000000e+000 |
| 5.400000e+001 | 0.000000e+000 |
| 5.500000e+001 | 0.000000e+000 |
| 5.600000e+001 | 0.000000e+000 |
| 5.700000e+001 | 0.000000e+000 |
| 5.800000e+001 | 0.000000e+000 |
| 5.900000e+001 | 0.000000e+000 |
| 6.000000e+001 | 0.000000e+000 |
| 82 132        |               |
| 1.000000e+000 | 0.000000e+000 |
| 2.000000e+000 | 0.000000e+000 |
| 3.000000e+000 | 0.000000e+000 |
| 4.000000e+000 | 0.000000e+000 |
| 5.000000e+000 | 0.000000e+000 |
| 6.000000e+000 | 0.000000e+000 |
| 7.000000e+000 | 0.000000e+000 |
| 8.000000e+000 | 0.000000e+000 |
| 9.000000e+000 | 0.000000e+000 |
| 1.000000e+001 | 0.000000e+000 |
| 1.100000e+001 | 0.000000e+000 |
| 1.200000e+001 | 0.000000e+000 |
| 1.300000e+001 | 0.000000e+000 |
| 1.400000e+001 | 0.000000e+000 |
| 1.500000e+001 | 0.000000e+000 |
| 1.600000e+001 | 3.295040e-005 |
| 1.700000e+001 | 1.551813e-003 |
| 1.800000e+001 | 7.878629e-003 |
| 1.900000e+001 | 1.864161e-002 |
| 2.000000e+001 | 3.158957e-002 |
| 2.100000e+001 | 4.625091e-002 |
| 2.200000e+001 | 6.115672e-002 |
| 2.300000e+001 | 7.281728e-002 |
| 2.400000e+001 | 7.937217e-002 |
| 2.500000e+001 | 8.096952e-002 |



|               |               |
|---------------|---------------|
| 2.600000e+001 | 8.518834e-002 |
| 2.700000e+001 | 9.426898e-002 |
| 2.800000e+001 | 1.039312e-001 |
| 2.900000e+001 | 1.057174e-001 |
| 3.000000e+001 | 9.222533e-002 |
| 3.100000e+001 | 6.343372e-002 |
| 3.200000e+001 | 3.446637e-002 |
| 3.300000e+001 | 1.500252e-002 |
| 3.400000e+001 | 4.924265e-003 |
| 3.500000e+001 | 5.806673e-004 |
| 3.600000e+001 | 0.000000e+000 |
| 3.700000e+001 | 0.000000e+000 |
| 3.800000e+001 | 0.000000e+000 |
| 3.900000e+001 | 0.000000e+000 |
| 4.000000e+001 | 0.000000e+000 |
| 4.100000e+001 | 0.000000e+000 |
| 4.200000e+001 | 0.000000e+000 |
| 4.300000e+001 | 0.000000e+000 |
| 4.400000e+001 | 0.000000e+000 |
| 4.500000e+001 | 0.000000e+000 |
| 4.600000e+001 | 0.000000e+000 |
| 4.700000e+001 | 0.000000e+000 |
| 4.800000e+001 | 0.000000e+000 |
| 4.900000e+001 | 0.000000e+000 |
| 5.000000e+001 | 0.000000e+000 |
| 5.100000e+001 | 0.000000e+000 |
| 5.200000e+001 | 0.000000e+000 |
| 5.300000e+001 | 0.000000e+000 |
| 5.400000e+001 | 0.000000e+000 |
| 5.500000e+001 | 0.000000e+000 |
| 5.600000e+001 | 0.000000e+000 |
| 5.700000e+001 | 0.000000e+000 |
| 5.800000e+001 | 0.000000e+000 |
| 5.900000e+001 | 0.000000e+000 |
| 6.000000e+001 | 0.000000e+000 |
| 82 134        |               |
| 1.000000e+000 | 0.000000e+000 |
| 2.000000e+000 | 0.000000e+000 |
| 3.000000e+000 | 0.000000e+000 |
| 4.000000e+000 | 0.000000e+000 |
| 5.000000e+000 | 0.000000e+000 |
| 6.000000e+000 | 0.000000e+000 |
| 7.000000e+000 | 0.000000e+000 |
| 8.000000e+000 | 0.000000e+000 |
| 9.000000e+000 | 0.000000e+000 |
| 1.000000e+001 | 0.000000e+000 |
| 1.100000e+001 | 0.000000e+000 |
| 1.200000e+001 | 0.000000e+000 |
| 1.300000e+001 | 0.000000e+000 |
| 1.400000e+001 | 0.000000e+000 |
| 1.500000e+001 | 0.000000e+000 |
| 1.600000e+001 | 0.000000e+000 |
| 1.700000e+001 | 0.000000e+000 |
| 1.800000e+001 | 0.000000e+000 |

|               |               |
|---------------|---------------|
| 1.900000e+001 | 0.000000e+000 |
| 2.000000e+001 | 0.000000e+000 |
| 2.100000e+001 | 0.000000e+000 |
| 2.200000e+001 | 0.000000e+000 |
| 2.300000e+001 | 0.000000e+000 |
| 2.400000e+001 | 0.000000e+000 |
| 2.500000e+001 | 5.228729e-004 |
| 2.600000e+001 | 4.139592e-003 |
| 2.700000e+001 | 1.179901e-002 |
| 2.800000e+001 | 2.305460e-002 |
| 2.900000e+001 | 3.779692e-002 |
| 3.000000e+001 | 5.501548e-002 |
| 3.100000e+001 | 7.489317e-002 |
| 3.200000e+001 | 9.762069e-002 |
| 3.300000e+001 | 1.183870e-001 |
| 3.400000e+001 | 1.320106e-001 |
| 3.500000e+001 | 1.353747e-001 |
| 3.600000e+001 | 1.248045e-001 |
| 3.700000e+001 | 9.775296e-002 |
| 3.800000e+001 | 5.918990e-002 |
| 3.900000e+001 | 2.300020e-002 |
| 4.000000e+001 | 3.064488e-003 |
| 4.100000e+001 | 0.000000e+000 |
| 4.200000e+001 | 0.000000e+000 |
| 4.300000e+001 | 0.000000e+000 |
| 4.400000e+001 | 0.000000e+000 |
| 4.500000e+001 | 0.000000e+000 |
| 4.600000e+001 | 0.000000e+000 |
| 4.700000e+001 | 0.000000e+000 |
| 4.800000e+001 | 0.000000e+000 |
| 4.900000e+001 | 0.000000e+000 |
| 5.000000e+001 | 0.000000e+000 |
| 5.100000e+001 | 0.000000e+000 |
| 5.200000e+001 | 0.000000e+000 |
| 5.300000e+001 | 0.000000e+000 |
| 5.400000e+001 | 0.000000e+000 |
| 5.500000e+001 | 0.000000e+000 |
| 5.600000e+001 | 0.000000e+000 |
| 5.700000e+001 | 0.000000e+000 |
| 5.800000e+001 | 0.000000e+000 |
| 5.900000e+001 | 0.000000e+000 |
| 6.000000e+001 | 0.000000e+000 |

82 155

|               |               |
|---------------|---------------|
| 1.000000e+000 | 0.000000e+000 |
| 2.000000e+000 | 0.000000e+000 |
| 3.000000e+000 | 0.000000e+000 |
| 4.000000e+000 | 0.000000e+000 |
| 5.000000e+000 | 0.000000e+000 |
| 6.000000e+000 | 0.000000e+000 |
| 7.000000e+000 | 0.000000e+000 |
| 8.000000e+000 | 0.000000e+000 |
| 9.000000e+000 | 0.000000e+000 |
| 1.000000e+001 | 0.000000e+000 |
| 1.100000e+001 | 0.000000e+000 |

|               |               |
|---------------|---------------|
| 1.200000e+001 | 0.000000e+000 |
| 1.300000e+001 | 0.000000e+000 |
| 1.400000e+001 | 0.000000e+000 |
| 1.500000e+001 | 0.000000e+000 |
| 1.600000e+001 | 0.000000e+000 |
| 1.700000e+001 | 0.000000e+000 |
| 1.800000e+001 | 0.000000e+000 |
| 1.900000e+001 | 0.000000e+000 |
| 2.000000e+001 | 0.000000e+000 |
| 2.100000e+001 | 0.000000e+000 |
| 2.200000e+001 | 0.000000e+000 |
| 2.300000e+001 | 0.000000e+000 |
| 2.400000e+001 | 0.000000e+000 |
| 2.500000e+001 | 0.000000e+000 |
| 2.600000e+001 | 3.861567e-003 |
| 2.700000e+001 | 7.653333e-003 |
| 2.800000e+001 | 3.739746e-003 |
| 2.900000e+001 | 3.960676e-003 |
| 3.000000e+001 | 6.696299e-003 |
| 3.100000e+001 | 2.174523e-002 |
| 3.200000e+001 | 6.170881e-002 |
| 3.300000e+001 | 9.617429e-002 |
| 3.400000e+001 | 8.212434e-002 |
| 3.500000e+001 | 7.358573e-002 |
| 3.600000e+001 | 1.395911e-001 |
| 3.700000e+001 | 2.229911e-001 |
| 3.800000e+001 | 2.016074e-001 |
| 3.900000e+001 | 7.456042e-002 |
| 4.000000e+001 | 0.000000e+000 |
| 4.100000e+001 | 0.000000e+000 |
| 4.200000e+001 | 0.000000e+000 |
| 4.300000e+001 | 0.000000e+000 |
| 4.400000e+001 | 0.000000e+000 |
| 4.500000e+001 | 0.000000e+000 |
| 4.600000e+001 | 0.000000e+000 |
| 4.700000e+001 | 0.000000e+000 |
| 4.800000e+001 | 0.000000e+000 |
| 4.900000e+001 | 0.000000e+000 |
| 5.000000e+001 | 0.000000e+000 |
| 5.100000e+001 | 0.000000e+000 |
| 5.200000e+001 | 0.000000e+000 |
| 5.300000e+001 | 0.000000e+000 |
| 5.400000e+001 | 0.000000e+000 |
| 5.500000e+001 | 0.000000e+000 |
| 5.600000e+001 | 0.000000e+000 |
| 5.700000e+001 | 0.000000e+000 |
| 5.800000e+001 | 0.000000e+000 |
| 5.900000e+001 | 0.000000e+000 |
| 6.000000e+001 | 0.000000e+000 |

82 94

|               |               |
|---------------|---------------|
| 1.000000e+000 | 0.000000e+000 |
| 2.000000e+000 | 0.000000e+000 |
| 3.000000e+000 | 0.000000e+000 |
| 4.000000e+000 | 0.000000e+000 |

|               |               |
|---------------|---------------|
| 5.000000e+000 | 0.000000e+000 |
| 6.000000e+000 | 0.000000e+000 |
| 7.000000e+000 | 0.000000e+000 |
| 8.000000e+000 | 0.000000e+000 |
| 9.000000e+000 | 0.000000e+000 |
| 1.000000e+001 | 0.000000e+000 |
| 1.100000e+001 | 0.000000e+000 |
| 1.200000e+001 | 0.000000e+000 |
| 1.300000e+001 | 0.000000e+000 |
| 1.400000e+001 | 0.000000e+000 |
| 1.500000e+001 | 0.000000e+000 |
| 1.600000e+001 | 6.408960e-006 |
| 1.700000e+001 | 0.000000e+000 |
| 1.800000e+001 | 0.000000e+000 |
| 1.900000e+001 | 0.000000e+000 |
| 2.000000e+001 | 0.000000e+000 |
| 2.100000e+001 | 0.000000e+000 |
| 2.200000e+001 | 6.157184e-004 |
| 2.300000e+001 | 5.397171e-003 |
| 2.400000e+001 | 1.533607e-002 |
| 2.500000e+001 | 3.206119e-002 |
| 2.600000e+001 | 5.625885e-002 |
| 2.700000e+001 | 8.067616e-002 |
| 2.800000e+001 | 9.351864e-002 |
| 2.900000e+001 | 9.438924e-002 |
| 3.000000e+001 | 9.647823e-002 |
| 3.100000e+001 | 1.032543e-001 |
| 3.200000e+001 | 1.035043e-001 |
| 3.300000e+001 | 9.450604e-002 |
| 3.400000e+001 | 8.199524e-002 |
| 3.500000e+001 | 6.724393e-002 |
| 3.600000e+001 | 4.676346e-002 |
| 3.700000e+001 | 2.233853e-002 |
| 3.800000e+001 | 4.560542e-003 |
| 3.900000e+001 | 0.000000e+000 |
| 4.000000e+001 | 0.000000e+000 |
| 4.100000e+001 | 0.000000e+000 |
| 4.200000e+001 | 0.000000e+000 |
| 4.300000e+001 | 0.000000e+000 |
| 4.400000e+001 | 0.000000e+000 |
| 4.500000e+001 | 1.335451e-004 |
| 4.600000e+001 | 5.079339e-004 |
| 4.700000e+001 | 3.988426e-004 |
| 4.800000e+001 | 5.568245e-005 |
| 4.900000e+001 | 0.000000e+000 |
| 5.000000e+001 | 0.000000e+000 |
| 5.100000e+001 | 0.000000e+000 |
| 5.200000e+001 | 0.000000e+000 |
| 5.300000e+001 | 0.000000e+000 |
| 5.400000e+001 | 0.000000e+000 |
| 5.500000e+001 | 0.000000e+000 |
| 5.600000e+001 | 0.000000e+000 |
| 5.700000e+001 | 0.000000e+000 |
| 5.800000e+001 | 0.000000e+000 |

|               |               |
|---------------|---------------|
| 5.900000e+001 | 0.000000e+000 |
| 6.000000e+001 | 0.000000e+000 |
| 93 108        |               |
| 1.000000e+000 | 0.000000e+000 |
| 2.000000e+000 | 0.000000e+000 |
| 3.000000e+000 | 0.000000e+000 |
| 4.000000e+000 | 0.000000e+000 |
| 5.000000e+000 | 0.000000e+000 |
| 6.000000e+000 | 0.000000e+000 |
| 7.000000e+000 | 0.000000e+000 |
| 8.000000e+000 | 0.000000e+000 |
| 9.000000e+000 | 0.000000e+000 |
| 1.000000e+001 | 0.000000e+000 |
| 1.100000e+001 | 0.000000e+000 |
| 1.200000e+001 | 0.000000e+000 |
| 1.300000e+001 | 0.000000e+000 |
| 1.400000e+001 | 0.000000e+000 |
| 1.500000e+001 | 0.000000e+000 |
| 1.600000e+001 | 3.443638e-002 |
| 1.700000e+001 | 4.242549e-003 |
| 1.800000e+001 | 0.000000e+000 |
| 1.900000e+001 | 5.844820e-002 |
| 2.000000e+001 | 5.923605e-002 |
| 2.100000e+001 | 1.032628e-001 |
| 2.200000e+001 | 1.494384e-001 |
| 2.300000e+001 | 2.755582e-001 |
| 2.400000e+001 | 8.150700e-002 |
| 2.500000e+001 | 7.430310e-002 |
| 2.600000e+001 | 2.927510e-002 |
| 2.700000e+001 | 3.555331e-002 |
| 2.800000e+001 | 5.108341e-002 |
| 2.900000e+001 | 4.830043e-003 |
| 3.000000e+001 | 1.737275e-003 |
| 3.100000e+001 | 1.780278e-002 |
| 3.200000e+001 | 7.117991e-003 |
| 3.300000e+001 | 0.000000e+000 |
| 3.400000e+001 | 0.000000e+000 |
| 3.500000e+001 | 0.000000e+000 |
| 3.600000e+001 | 1.828946e-003 |
| 3.700000e+001 | 6.235078e-003 |
| 3.800000e+001 | 2.051336e-003 |
| 3.900000e+001 | 0.000000e+000 |
| 4.000000e+001 | 0.000000e+000 |
| 4.100000e+001 | 0.000000e+000 |
| 4.200000e+001 | 0.000000e+000 |
| 4.300000e+001 | 0.000000e+000 |
| 4.400000e+001 | 0.000000e+000 |
| 4.500000e+001 | 0.000000e+000 |
| 4.600000e+001 | 0.000000e+000 |
| 4.700000e+001 | 0.000000e+000 |
| 4.800000e+001 | 0.000000e+000 |
| 4.900000e+001 | 0.000000e+000 |
| 5.000000e+001 | 0.000000e+000 |
| 5.100000e+001 | 0.000000e+000 |

|               |               |
|---------------|---------------|
| 5.200000e+001 | 0.000000e+000 |
| 5.300000e+001 | 0.000000e+000 |
| 5.400000e+001 | 0.000000e+000 |
| 5.500000e+001 | 0.000000e+000 |
| 5.600000e+001 | 0.000000e+000 |
| 5.700000e+001 | 0.000000e+000 |
| 5.800000e+001 | 0.000000e+000 |
| 5.900000e+001 | 0.000000e+000 |
| 6.000000e+001 | 0.000000e+000 |
| 93 123        |               |
| 1.000000e+000 | 0.000000e+000 |
| 2.000000e+000 | 0.000000e+000 |
| 3.000000e+000 | 0.000000e+000 |
| 4.000000e+000 | 0.000000e+000 |
| 5.000000e+000 | 0.000000e+000 |
| 6.000000e+000 | 0.000000e+000 |
| 7.000000e+000 | 0.000000e+000 |
| 8.000000e+000 | 0.000000e+000 |
| 9.000000e+000 | 0.000000e+000 |
| 1.000000e+001 | 0.000000e+000 |
| 1.100000e+001 | 0.000000e+000 |
| 1.200000e+001 | 0.000000e+000 |
| 1.300000e+001 | 0.000000e+000 |
| 1.400000e+001 | 0.000000e+000 |
| 1.500000e+001 | 0.000000e+000 |
| 1.600000e+001 | 1.109777e-003 |
| 1.700000e+001 | 0.000000e+000 |
| 1.800000e+001 | 0.000000e+000 |
| 1.900000e+001 | 6.383677e-003 |
| 2.000000e+001 | 3.421155e-002 |
| 2.100000e+001 | 5.250800e-002 |
| 2.200000e+001 | 5.291930e-002 |
| 2.300000e+001 | 8.777897e-002 |
| 2.400000e+001 | 1.738419e-001 |
| 2.500000e+001 | 2.506974e-001 |
| 2.600000e+001 | 1.283509e-001 |
| 2.700000e+001 | 5.793872e-002 |
| 2.800000e+001 | 7.713262e-002 |
| 2.900000e+001 | 6.474941e-002 |
| 3.000000e+001 | 1.225555e-002 |
| 3.100000e+001 | 0.000000e+000 |
| 3.200000e+001 | 0.000000e+000 |
| 3.300000e+001 | 1.222071e-004 |
| 3.400000e+001 | 0.000000e+000 |
| 3.500000e+001 | 0.000000e+000 |
| 3.600000e+001 | 0.000000e+000 |
| 3.700000e+001 | 0.000000e+000 |
| 3.800000e+001 | 0.000000e+000 |
| 3.900000e+001 | 0.000000e+000 |
| 4.000000e+001 | 0.000000e+000 |
| 4.100000e+001 | 0.000000e+000 |
| 4.200000e+001 | 0.000000e+000 |
| 4.300000e+001 | 0.000000e+000 |
| 4.400000e+001 | 0.000000e+000 |



|               |               |
|---------------|---------------|
| 4.500000e+001 | 0.000000e+000 |
| 4.600000e+001 | 0.000000e+000 |
| 4.700000e+001 | 0.000000e+000 |
| 4.800000e+001 | 0.000000e+000 |
| 4.900000e+001 | 0.000000e+000 |
| 5.000000e+001 | 0.000000e+000 |
| 5.100000e+001 | 0.000000e+000 |
| 5.200000e+001 | 0.000000e+000 |
| 5.300000e+001 | 0.000000e+000 |
| 5.400000e+001 | 0.000000e+000 |
| 5.500000e+001 | 0.000000e+000 |
| 5.600000e+001 | 0.000000e+000 |
| 5.700000e+001 | 0.000000e+000 |
| 5.800000e+001 | 0.000000e+000 |
| 5.900000e+001 | 0.000000e+000 |
| 6.000000e+001 | 0.000000e+000 |
| 93 134        |               |
| 1.000000e+000 | 0.000000e+000 |
| 2.000000e+000 | 0.000000e+000 |
| 3.000000e+000 | 0.000000e+000 |
| 4.000000e+000 | 0.000000e+000 |
| 5.000000e+000 | 0.000000e+000 |
| 6.000000e+000 | 0.000000e+000 |
| 7.000000e+000 | 0.000000e+000 |
| 8.000000e+000 | 0.000000e+000 |
| 9.000000e+000 | 0.000000e+000 |
| 1.000000e+001 | 0.000000e+000 |
| 1.100000e+001 | 0.000000e+000 |
| 1.200000e+001 | 0.000000e+000 |
| 1.300000e+001 | 0.000000e+000 |
| 1.400000e+001 | 0.000000e+000 |
| 1.500000e+001 | 0.000000e+000 |
| 1.600000e+001 | 7.728195e-006 |
| 1.700000e+001 | 0.000000e+000 |
| 1.800000e+001 | 0.000000e+000 |
| 1.900000e+001 | 0.000000e+000 |
| 2.000000e+001 | 3.356682e-004 |
| 2.100000e+001 | 1.299572e-003 |
| 2.200000e+001 | 1.092842e-004 |
| 2.300000e+001 | 0.000000e+000 |
| 2.400000e+001 | 1.146967e-004 |
| 2.500000e+001 | 0.000000e+000 |
| 2.600000e+001 | 2.209851e-002 |
| 2.700000e+001 | 1.974028e-001 |
| 2.800000e+001 | 3.107272e-001 |
| 2.900000e+001 | 1.978317e-001 |
| 3.000000e+001 | 5.737645e-002 |
| 3.100000e+001 | 2.554322e-002 |
| 3.200000e+001 | 4.876430e-002 |
| 3.300000e+001 | 6.137066e-002 |
| 3.400000e+001 | 4.926177e-002 |
| 3.500000e+001 | 1.931375e-002 |
| 3.600000e+001 | 9.692302e-004 |
| 3.700000e+001 | 1.301882e-003 |

|               |               |
|---------------|---------------|
| 3.800000e+001 | 4.726187e-003 |
| 3.900000e+001 | 1.445375e-003 |
| 4.000000e+001 | 0.000000e+000 |
| 4.100000e+001 | 0.000000e+000 |
| 4.200000e+001 | 0.000000e+000 |
| 4.300000e+001 | 0.000000e+000 |
| 4.400000e+001 | 0.000000e+000 |
| 4.500000e+001 | 0.000000e+000 |
| 4.600000e+001 | 0.000000e+000 |
| 4.700000e+001 | 0.000000e+000 |
| 4.800000e+001 | 0.000000e+000 |
| 4.900000e+001 | 0.000000e+000 |
| 5.000000e+001 | 0.000000e+000 |
| 5.100000e+001 | 0.000000e+000 |
| 5.200000e+001 | 0.000000e+000 |
| 5.300000e+001 | 0.000000e+000 |
| 5.400000e+001 | 0.000000e+000 |
| 5.500000e+001 | 0.000000e+000 |
| 5.600000e+001 | 0.000000e+000 |
| 5.700000e+001 | 0.000000e+000 |
| 5.800000e+001 | 0.000000e+000 |
| 5.900000e+001 | 0.000000e+000 |
| 6.000000e+001 | 0.000000e+000 |

93 154

|               |               |
|---------------|---------------|
| 1.000000e+000 | 0.000000e+000 |
| 2.000000e+000 | 0.000000e+000 |
| 3.000000e+000 | 0.000000e+000 |
| 4.000000e+000 | 0.000000e+000 |
| 5.000000e+000 | 0.000000e+000 |
| 6.000000e+000 | 0.000000e+000 |
| 7.000000e+000 | 0.000000e+000 |
| 8.000000e+000 | 0.000000e+000 |
| 9.000000e+000 | 0.000000e+000 |
| 1.000000e+001 | 0.000000e+000 |
| 1.100000e+001 | 0.000000e+000 |
| 1.200000e+001 | 0.000000e+000 |
| 1.300000e+001 | 0.000000e+000 |
| 1.400000e+001 | 0.000000e+000 |
| 1.500000e+001 | 4.309265e-003 |
| 1.600000e+001 | 5.646097e-003 |
| 1.700000e+001 | 5.704543e-004 |
| 1.800000e+001 | 2.291280e-004 |
| 1.900000e+001 | 0.000000e+000 |
| 2.000000e+001 | 0.000000e+000 |
| 2.100000e+001 | 5.840371e-003 |
| 2.200000e+001 | 6.260996e-002 |
| 2.300000e+001 | 1.534879e-001 |
| 2.400000e+001 | 2.185573e-001 |
| 2.500000e+001 | 2.010563e-001 |
| 2.600000e+001 | 1.328249e-001 |
| 2.700000e+001 | 6.471796e-002 |
| 2.800000e+001 | 4.699347e-002 |
| 2.900000e+001 | 5.280649e-002 |
| 3.000000e+001 | 3.189503e-002 |

|               |               |
|---------------|---------------|
| 3.100000e+001 | 7.478481e-003 |
| 3.200000e+001 | 5.409691e-003 |
| 3.300000e+001 | 5.260518e-003 |
| 3.400000e+001 | 3.067015e-004 |
| 3.500000e+001 | 0.000000e+000 |
| 3.600000e+001 | 0.000000e+000 |
| 3.700000e+001 | 0.000000e+000 |
| 3.800000e+001 | 0.000000e+000 |
| 3.900000e+001 | 0.000000e+000 |
| 4.000000e+001 | 0.000000e+000 |
| 4.100000e+001 | 0.000000e+000 |
| 4.200000e+001 | 0.000000e+000 |
| 4.300000e+001 | 0.000000e+000 |
| 4.400000e+001 | 0.000000e+000 |
| 4.500000e+001 | 0.000000e+000 |
| 4.600000e+001 | 0.000000e+000 |
| 4.700000e+001 | 0.000000e+000 |
| 4.800000e+001 | 0.000000e+000 |
| 4.900000e+001 | 0.000000e+000 |
| 5.000000e+001 | 0.000000e+000 |
| 5.100000e+001 | 0.000000e+000 |
| 5.200000e+001 | 0.000000e+000 |
| 5.300000e+001 | 0.000000e+000 |
| 5.400000e+001 | 0.000000e+000 |
| 5.500000e+001 | 0.000000e+000 |
| 5.600000e+001 | 0.000000e+000 |
| 5.700000e+001 | 0.000000e+000 |
| 5.800000e+001 | 0.000000e+000 |
| 5.900000e+001 | 0.000000e+000 |
| 6.000000e+001 | 0.000000e+000 |
| 94 123        |               |
| 1.000000e+000 | 0.000000e+000 |
| 2.000000e+000 | 0.000000e+000 |
| 3.000000e+000 | 0.000000e+000 |
| 4.000000e+000 | 0.000000e+000 |
| 5.000000e+000 | 0.000000e+000 |
| 6.000000e+000 | 0.000000e+000 |
| 7.000000e+000 | 0.000000e+000 |
| 8.000000e+000 | 0.000000e+000 |
| 9.000000e+000 | 0.000000e+000 |
| 1.000000e+001 | 0.000000e+000 |
| 1.100000e+001 | 0.000000e+000 |
| 1.200000e+001 | 0.000000e+000 |
| 1.300000e+001 | 0.000000e+000 |
| 1.400000e+001 | 0.000000e+000 |
| 1.500000e+001 | 0.000000e+000 |
| 1.600000e+001 | 1.670862e-005 |
| 1.700000e+001 | 8.075972e-004 |
| 1.800000e+001 | 8.541572e-003 |
| 1.900000e+001 | 2.694593e-002 |
| 2.000000e+001 | 5.834554e-002 |
| 2.100000e+001 | 9.691417e-002 |
| 2.200000e+001 | 1.261177e-001 |
| 2.300000e+001 | 1.311875e-001 |

|               |               |
|---------------|---------------|
| 2.400000e+001 | 1.205768e-001 |
| 2.500000e+001 | 1.143216e-001 |
| 2.600000e+001 | 1.139632e-001 |
| 2.700000e+001 | 1.030096e-001 |
| 2.800000e+001 | 6.864600e-002 |
| 2.900000e+001 | 2.700735e-002 |
| 3.000000e+001 | 3.598870e-003 |
| 3.100000e+001 | 0.000000e+000 |
| 3.200000e+001 | 0.000000e+000 |
| 3.300000e+001 | 0.000000e+000 |
| 3.400000e+001 | 0.000000e+000 |
| 3.500000e+001 | 0.000000e+000 |
| 3.600000e+001 | 0.000000e+000 |
| 3.700000e+001 | 0.000000e+000 |
| 3.800000e+001 | 0.000000e+000 |
| 3.900000e+001 | 0.000000e+000 |
| 4.000000e+001 | 0.000000e+000 |
| 4.100000e+001 | 0.000000e+000 |
| 4.200000e+001 | 0.000000e+000 |
| 4.300000e+001 | 0.000000e+000 |
| 4.400000e+001 | 0.000000e+000 |
| 4.500000e+001 | 0.000000e+000 |
| 4.600000e+001 | 0.000000e+000 |
| 4.700000e+001 | 0.000000e+000 |
| 4.800000e+001 | 0.000000e+000 |
| 4.900000e+001 | 0.000000e+000 |
| 5.000000e+001 | 0.000000e+000 |
| 5.100000e+001 | 0.000000e+000 |
| 5.200000e+001 | 0.000000e+000 |
| 5.300000e+001 | 0.000000e+000 |
| 5.400000e+001 | 0.000000e+000 |
| 5.500000e+001 | 0.000000e+000 |
| 5.600000e+001 | 0.000000e+000 |
| 5.700000e+001 | 0.000000e+000 |
| 5.800000e+001 | 0.000000e+000 |
| 5.900000e+001 | 0.000000e+000 |
| 6.000000e+001 | 0.000000e+000 |

94 132

|               |               |
|---------------|---------------|
| 1.000000e+000 | 0.000000e+000 |
| 2.000000e+000 | 0.000000e+000 |
| 3.000000e+000 | 0.000000e+000 |
| 4.000000e+000 | 0.000000e+000 |
| 5.000000e+000 | 0.000000e+000 |
| 6.000000e+000 | 0.000000e+000 |
| 7.000000e+000 | 0.000000e+000 |
| 8.000000e+000 | 0.000000e+000 |
| 9.000000e+000 | 0.000000e+000 |
| 1.000000e+001 | 0.000000e+000 |
| 1.100000e+001 | 0.000000e+000 |
| 1.200000e+001 | 0.000000e+000 |
| 1.300000e+001 | 0.000000e+000 |
| 1.400000e+001 | 0.000000e+000 |
| 1.500000e+001 | 0.000000e+000 |
| 1.600000e+001 | 0.000000e+000 |

|               |               |
|---------------|---------------|
| 1.700000e+001 | 0.000000e+000 |
| 1.800000e+001 | 0.000000e+000 |
| 1.900000e+001 | 0.000000e+000 |
| 2.000000e+001 | 0.000000e+000 |
| 2.100000e+001 | 0.000000e+000 |
| 2.200000e+001 | 0.000000e+000 |
| 2.300000e+001 | 0.000000e+000 |
| 2.400000e+001 | 0.000000e+000 |
| 2.500000e+001 | 0.000000e+000 |
| 2.600000e+001 | 0.000000e+000 |
| 2.700000e+001 | 0.000000e+000 |
| 2.800000e+001 | 4.134393e-003 |
| 2.900000e+001 | 4.213984e-002 |
| 3.000000e+001 | 1.143725e-001 |
| 3.100000e+001 | 2.566297e-001 |
| 3.200000e+001 | 3.156305e-001 |
| 3.300000e+001 | 2.004071e-001 |
| 3.400000e+001 | 5.458532e-002 |
| 3.500000e+001 | 4.253277e-003 |
| 3.600000e+001 | 5.654732e-003 |
| 3.700000e+001 | 2.192526e-003 |
| 3.800000e+001 | 0.000000e+000 |
| 3.900000e+001 | 0.000000e+000 |
| 4.000000e+001 | 0.000000e+000 |
| 4.100000e+001 | 0.000000e+000 |
| 4.200000e+001 | 0.000000e+000 |
| 4.300000e+001 | 0.000000e+000 |
| 4.400000e+001 | 0.000000e+000 |
| 4.500000e+001 | 0.000000e+000 |
| 4.600000e+001 | 0.000000e+000 |
| 4.700000e+001 | 0.000000e+000 |
| 4.800000e+001 | 0.000000e+000 |
| 4.900000e+001 | 0.000000e+000 |
| 5.000000e+001 | 0.000000e+000 |
| 5.100000e+001 | 0.000000e+000 |
| 5.200000e+001 | 0.000000e+000 |
| 5.300000e+001 | 0.000000e+000 |
| 5.400000e+001 | 0.000000e+000 |
| 5.500000e+001 | 0.000000e+000 |
| 5.600000e+001 | 0.000000e+000 |
| 5.700000e+001 | 0.000000e+000 |
| 5.800000e+001 | 0.000000e+000 |
| 5.900000e+001 | 0.000000e+000 |
| 6.000000e+001 | 0.000000e+000 |
| 115 155       |               |
| 1.000000e+000 | 0.000000e+000 |
| 2.000000e+000 | 0.000000e+000 |
| 3.000000e+000 | 0.000000e+000 |
| 4.000000e+000 | 0.000000e+000 |
| 5.000000e+000 | 0.000000e+000 |
| 6.000000e+000 | 0.000000e+000 |
| 7.000000e+000 | 0.000000e+000 |
| 8.000000e+000 | 0.000000e+000 |
| 9.000000e+000 | 0.000000e+000 |

|               |               |
|---------------|---------------|
| 1.000000e+001 | 0.000000e+000 |
| 1.100000e+001 | 0.000000e+000 |
| 1.200000e+001 | 0.000000e+000 |
| 1.300000e+001 | 0.000000e+000 |
| 1.400000e+001 | 0.000000e+000 |
| 1.500000e+001 | 0.000000e+000 |
| 1.600000e+001 | 0.000000e+000 |
| 1.700000e+001 | 0.000000e+000 |
| 1.800000e+001 | 0.000000e+000 |
| 1.900000e+001 | 0.000000e+000 |
| 2.000000e+001 | 0.000000e+000 |
| 2.100000e+001 | 0.000000e+000 |
| 2.200000e+001 | 0.000000e+000 |
| 2.300000e+001 | 0.000000e+000 |
| 2.400000e+001 | 0.000000e+000 |
| 2.500000e+001 | 0.000000e+000 |
| 2.600000e+001 | 6.939660e-002 |
| 2.700000e+001 | 3.744672e-001 |
| 2.800000e+001 | 2.510352e-001 |
| 2.900000e+001 | 8.245175e-002 |
| 3.000000e+001 | 4.661982e-002 |
| 3.100000e+001 | 7.671717e-002 |
| 3.200000e+001 | 8.419496e-002 |
| 3.300000e+001 | 1.511731e-002 |
| 3.400000e+001 | 0.000000e+000 |
| 3.500000e+001 | 0.000000e+000 |
| 3.600000e+001 | 0.000000e+000 |
| 3.700000e+001 | 0.000000e+000 |
| 3.800000e+001 | 0.000000e+000 |
| 3.900000e+001 | 0.000000e+000 |
| 4.000000e+001 | 0.000000e+000 |
| 4.100000e+001 | 0.000000e+000 |
| 4.200000e+001 | 0.000000e+000 |
| 4.300000e+001 | 0.000000e+000 |
| 4.400000e+001 | 0.000000e+000 |
| 4.500000e+001 | 0.000000e+000 |
| 4.600000e+001 | 0.000000e+000 |
| 4.700000e+001 | 0.000000e+000 |
| 4.800000e+001 | 0.000000e+000 |
| 4.900000e+001 | 0.000000e+000 |
| 5.000000e+001 | 0.000000e+000 |
| 5.100000e+001 | 0.000000e+000 |
| 5.200000e+001 | 0.000000e+000 |
| 5.300000e+001 | 0.000000e+000 |
| 5.400000e+001 | 0.000000e+000 |
| 5.500000e+001 | 0.000000e+000 |
| 5.600000e+001 | 0.000000e+000 |
| 5.700000e+001 | 0.000000e+000 |
| 5.800000e+001 | 0.000000e+000 |
| 5.900000e+001 | 0.000000e+000 |
| 6.000000e+001 | 0.000000e+000 |
| 116 134       |               |
| 1.000000e+000 | 0.000000e+000 |
| 2.000000e+000 | 0.000000e+000 |

|               |               |
|---------------|---------------|
| 3.000000e+000 | 0.000000e+000 |
| 4.000000e+000 | 0.000000e+000 |
| 5.000000e+000 | 0.000000e+000 |
| 6.000000e+000 | 0.000000e+000 |
| 7.000000e+000 | 0.000000e+000 |
| 8.000000e+000 | 0.000000e+000 |
| 9.000000e+000 | 0.000000e+000 |
| 1.000000e+001 | 0.000000e+000 |
| 1.100000e+001 | 0.000000e+000 |
| 1.200000e+001 | 0.000000e+000 |
| 1.300000e+001 | 0.000000e+000 |
| 1.400000e+001 | 0.000000e+000 |
| 1.500000e+001 | 0.000000e+000 |
| 1.600000e+001 | 6.508791e-003 |
| 1.700000e+001 | 3.865644e-002 |
| 1.800000e+001 | 1.020555e-001 |
| 1.900000e+001 | 1.797986e-001 |
| 2.000000e+001 | 2.434136e-001 |
| 2.100000e+001 | 2.375143e-001 |
| 2.200000e+001 | 1.363969e-001 |
| 2.300000e+001 | 4.791055e-002 |
| 2.400000e+001 | 7.655199e-003 |
| 2.500000e+001 | 9.027876e-005 |
| 2.600000e+001 | 0.000000e+000 |
| 2.700000e+001 | 0.000000e+000 |
| 2.800000e+001 | 0.000000e+000 |
| 2.900000e+001 | 0.000000e+000 |
| 3.000000e+001 | 0.000000e+000 |
| 3.100000e+001 | 0.000000e+000 |
| 3.200000e+001 | 0.000000e+000 |
| 3.300000e+001 | 0.000000e+000 |
| 3.400000e+001 | 0.000000e+000 |
| 3.500000e+001 | 0.000000e+000 |
| 3.600000e+001 | 0.000000e+000 |
| 3.700000e+001 | 0.000000e+000 |
| 3.800000e+001 | 0.000000e+000 |
| 3.900000e+001 | 0.000000e+000 |
| 4.000000e+001 | 0.000000e+000 |
| 4.100000e+001 | 0.000000e+000 |
| 4.200000e+001 | 0.000000e+000 |
| 4.300000e+001 | 0.000000e+000 |
| 4.400000e+001 | 0.000000e+000 |
| 4.500000e+001 | 0.000000e+000 |
| 4.600000e+001 | 0.000000e+000 |
| 4.700000e+001 | 0.000000e+000 |
| 4.800000e+001 | 0.000000e+000 |
| 4.900000e+001 | 0.000000e+000 |
| 5.000000e+001 | 0.000000e+000 |
| 5.100000e+001 | 0.000000e+000 |
| 5.200000e+001 | 0.000000e+000 |
| 5.300000e+001 | 0.000000e+000 |
| 5.400000e+001 | 0.000000e+000 |
| 5.500000e+001 | 0.000000e+000 |
| 5.600000e+001 | 0.000000e+000 |



|               |               |
|---------------|---------------|
| 5.700000e+001 | 0.000000e+000 |
| 5.800000e+001 | 0.000000e+000 |
| 5.900000e+001 | 0.000000e+000 |
| 6.000000e+001 | 0.000000e+000 |
| 119 128       |               |
| 1.000000e+000 | 0.000000e+000 |
| 2.000000e+000 | 0.000000e+000 |
| 3.000000e+000 | 0.000000e+000 |
| 4.000000e+000 | 0.000000e+000 |
| 5.000000e+000 | 0.000000e+000 |
| 6.000000e+000 | 0.000000e+000 |
| 7.000000e+000 | 0.000000e+000 |
| 8.000000e+000 | 0.000000e+000 |
| 9.000000e+000 | 0.000000e+000 |
| 1.000000e+001 | 0.000000e+000 |
| 1.100000e+001 | 0.000000e+000 |
| 1.200000e+001 | 0.000000e+000 |
| 1.300000e+001 | 0.000000e+000 |
| 1.400000e+001 | 0.000000e+000 |
| 1.500000e+001 | 2.763519e-002 |
| 1.600000e+001 | 5.461842e-002 |
| 1.700000e+001 | 8.116524e-002 |
| 1.800000e+001 | 1.029389e-001 |
| 1.900000e+001 | 1.244211e-001 |
| 2.000000e+001 | 1.529069e-001 |
| 2.100000e+001 | 1.725705e-001 |
| 2.200000e+001 | 1.522663e-001 |
| 2.300000e+001 | 9.406765e-002 |
| 2.400000e+001 | 3.368823e-002 |
| 2.500000e+001 | 3.721478e-003 |
| 2.600000e+001 | 0.000000e+000 |
| 2.700000e+001 | 0.000000e+000 |
| 2.800000e+001 | 0.000000e+000 |
| 2.900000e+001 | 0.000000e+000 |
| 3.000000e+001 | 0.000000e+000 |
| 3.100000e+001 | 0.000000e+000 |
| 3.200000e+001 | 0.000000e+000 |
| 3.300000e+001 | 0.000000e+000 |
| 3.400000e+001 | 0.000000e+000 |
| 3.500000e+001 | 0.000000e+000 |
| 3.600000e+001 | 0.000000e+000 |
| 3.700000e+001 | 0.000000e+000 |
| 3.800000e+001 | 0.000000e+000 |
| 3.900000e+001 | 0.000000e+000 |
| 4.000000e+001 | 0.000000e+000 |
| 4.100000e+001 | 0.000000e+000 |
| 4.200000e+001 | 0.000000e+000 |
| 4.300000e+001 | 0.000000e+000 |
| 4.400000e+001 | 0.000000e+000 |
| 4.500000e+001 | 0.000000e+000 |
| 4.600000e+001 | 0.000000e+000 |
| 4.700000e+001 | 0.000000e+000 |
| 4.800000e+001 | 0.000000e+000 |
| 4.900000e+001 | 0.000000e+000 |

|               |               |
|---------------|---------------|
| 5.000000e+001 | 0.000000e+000 |
| 5.100000e+001 | 0.000000e+000 |
| 5.200000e+001 | 0.000000e+000 |
| 5.300000e+001 | 0.000000e+000 |
| 5.400000e+001 | 0.000000e+000 |
| 5.500000e+001 | 0.000000e+000 |
| 5.600000e+001 | 0.000000e+000 |
| 5.700000e+001 | 0.000000e+000 |
| 5.800000e+001 | 0.000000e+000 |
| 5.900000e+001 | 0.000000e+000 |
| 6.000000e+001 | 0.000000e+000 |
| 119 131       |               |
| 1.000000e+000 | 0.000000e+000 |
| 2.000000e+000 | 0.000000e+000 |
| 3.000000e+000 | 0.000000e+000 |
| 4.000000e+000 | 0.000000e+000 |
| 5.000000e+000 | 0.000000e+000 |
| 6.000000e+000 | 0.000000e+000 |
| 7.000000e+000 | 0.000000e+000 |
| 8.000000e+000 | 0.000000e+000 |
| 9.000000e+000 | 0.000000e+000 |
| 1.000000e+001 | 0.000000e+000 |
| 1.100000e+001 | 0.000000e+000 |
| 1.200000e+001 | 0.000000e+000 |
| 1.300000e+001 | 0.000000e+000 |
| 1.400000e+001 | 0.000000e+000 |
| 1.500000e+001 | 0.000000e+000 |
| 1.600000e+001 | 1.071701e-002 |
| 1.700000e+001 | 2.581418e-002 |
| 1.800000e+001 | 4.674933e-002 |
| 1.900000e+001 | 7.265623e-002 |
| 2.000000e+001 | 1.000971e-001 |
| 2.100000e+001 | 1.234563e-001 |
| 2.200000e+001 | 1.371545e-001 |
| 2.300000e+001 | 1.375077e-001 |
| 2.400000e+001 | 1.229227e-001 |
| 2.500000e+001 | 9.648776e-002 |
| 2.600000e+001 | 6.553612e-002 |
| 2.700000e+001 | 3.801532e-002 |
| 2.800000e+001 | 1.756517e-002 |
| 2.900000e+001 | 5.052910e-003 |
| 3.000000e+001 | 2.676792e-004 |
| 3.100000e+001 | 0.000000e+000 |
| 3.200000e+001 | 0.000000e+000 |
| 3.300000e+001 | 0.000000e+000 |
| 3.400000e+001 | 0.000000e+000 |
| 3.500000e+001 | 0.000000e+000 |
| 3.600000e+001 | 0.000000e+000 |
| 3.700000e+001 | 0.000000e+000 |
| 3.800000e+001 | 0.000000e+000 |
| 3.900000e+001 | 0.000000e+000 |
| 4.000000e+001 | 0.000000e+000 |
| 4.100000e+001 | 0.000000e+000 |
| 4.200000e+001 | 0.000000e+000 |

|               |               |
|---------------|---------------|
| 4.300000e+001 | 0.000000e+000 |
| 4.400000e+001 | 0.000000e+000 |
| 4.500000e+001 | 0.000000e+000 |
| 4.600000e+001 | 0.000000e+000 |
| 4.700000e+001 | 0.000000e+000 |
| 4.800000e+001 | 0.000000e+000 |
| 4.900000e+001 | 0.000000e+000 |
| 5.000000e+001 | 0.000000e+000 |
| 5.100000e+001 | 0.000000e+000 |
| 5.200000e+001 | 0.000000e+000 |
| 5.300000e+001 | 0.000000e+000 |
| 5.400000e+001 | 0.000000e+000 |
| 5.500000e+001 | 0.000000e+000 |
| 5.600000e+001 | 0.000000e+000 |
| 5.700000e+001 | 0.000000e+000 |
| 5.800000e+001 | 0.000000e+000 |
| 5.900000e+001 | 0.000000e+000 |
| 6.000000e+001 | 0.000000e+000 |
| 123 131       |               |
| 1.000000e+000 | 0.000000e+000 |
| 2.000000e+000 | 0.000000e+000 |
| 3.000000e+000 | 0.000000e+000 |
| 4.000000e+000 | 0.000000e+000 |
| 5.000000e+000 | 0.000000e+000 |
| 6.000000e+000 | 0.000000e+000 |
| 7.000000e+000 | 0.000000e+000 |
| 8.000000e+000 | 0.000000e+000 |
| 9.000000e+000 | 0.000000e+000 |
| 1.000000e+001 | 0.000000e+000 |
| 1.100000e+001 | 0.000000e+000 |
| 1.200000e+001 | 0.000000e+000 |
| 1.300000e+001 | 0.000000e+000 |
| 1.400000e+001 | 0.000000e+000 |
| 1.500000e+001 | 0.000000e+000 |
| 1.600000e+001 | 2.147984e-003 |
| 1.700000e+001 | 1.890496e-002 |
| 1.800000e+001 | 5.195638e-002 |
| 1.900000e+001 | 8.988301e-002 |
| 2.000000e+001 | 1.173597e-001 |
| 2.100000e+001 | 1.287078e-001 |
| 2.200000e+001 | 1.284007e-001 |
| 2.300000e+001 | 1.203045e-001 |
| 2.400000e+001 | 1.073518e-001 |
| 2.500000e+001 | 9.019739e-002 |
| 2.600000e+001 | 7.294452e-002 |
| 2.700000e+001 | 4.930255e-002 |
| 2.800000e+001 | 2.034338e-002 |
| 2.900000e+001 | 2.195276e-003 |
| 3.000000e+001 | 0.000000e+000 |
| 3.100000e+001 | 0.000000e+000 |
| 3.200000e+001 | 0.000000e+000 |
| 3.300000e+001 | 0.000000e+000 |
| 3.400000e+001 | 0.000000e+000 |
| 3.500000e+001 | 0.000000e+000 |

|               |               |
|---------------|---------------|
| 3.600000e+001 | 0.000000e+000 |
| 3.700000e+001 | 0.000000e+000 |
| 3.800000e+001 | 0.000000e+000 |
| 3.900000e+001 | 0.000000e+000 |
| 4.000000e+001 | 0.000000e+000 |
| 4.100000e+001 | 0.000000e+000 |
| 4.200000e+001 | 0.000000e+000 |
| 4.300000e+001 | 0.000000e+000 |
| 4.400000e+001 | 0.000000e+000 |
| 4.500000e+001 | 0.000000e+000 |
| 4.600000e+001 | 0.000000e+000 |
| 4.700000e+001 | 0.000000e+000 |
| 4.800000e+001 | 0.000000e+000 |
| 4.900000e+001 | 0.000000e+000 |
| 5.000000e+001 | 0.000000e+000 |
| 5.100000e+001 | 0.000000e+000 |
| 5.200000e+001 | 0.000000e+000 |
| 5.300000e+001 | 0.000000e+000 |
| 5.400000e+001 | 0.000000e+000 |
| 5.500000e+001 | 0.000000e+000 |
| 5.600000e+001 | 0.000000e+000 |
| 5.700000e+001 | 0.000000e+000 |
| 5.800000e+001 | 0.000000e+000 |
| 5.900000e+001 | 0.000000e+000 |
| 6.000000e+001 | 0.000000e+000 |
| 128 155       |               |
| 1.000000e+000 | 0.000000e+000 |
| 2.000000e+000 | 0.000000e+000 |
| 3.000000e+000 | 0.000000e+000 |
| 4.000000e+000 | 0.000000e+000 |
| 5.000000e+000 | 0.000000e+000 |
| 6.000000e+000 | 0.000000e+000 |
| 7.000000e+000 | 0.000000e+000 |
| 8.000000e+000 | 0.000000e+000 |
| 9.000000e+000 | 0.000000e+000 |
| 1.000000e+001 | 0.000000e+000 |
| 1.100000e+001 | 0.000000e+000 |
| 1.200000e+001 | 0.000000e+000 |
| 1.300000e+001 | 0.000000e+000 |
| 1.400000e+001 | 0.000000e+000 |
| 1.500000e+001 | 4.055239e-002 |
| 1.600000e+001 | 8.894363e-002 |
| 1.700000e+001 | 7.130746e-002 |
| 1.800000e+001 | 6.422266e-002 |
| 1.900000e+001 | 8.738108e-002 |
| 2.000000e+001 | 7.468546e-002 |
| 2.100000e+001 | 1.492886e-001 |
| 2.200000e+001 | 2.101065e-001 |
| 2.300000e+001 | 1.128612e-001 |
| 2.400000e+001 | 3.432380e-002 |
| 2.500000e+001 | 2.021626e-002 |
| 2.600000e+001 | 1.209754e-002 |
| 2.700000e+001 | 1.621819e-003 |
| 2.800000e+001 | 4.798071e-003 |

|               |               |
|---------------|---------------|
| 2.900000e+001 | 1.680998e-003 |
| 3.000000e+001 | 0.000000e+000 |
| 3.100000e+001 | 3.296542e-003 |
| 3.200000e+001 | 1.156773e-002 |
| 3.300000e+001 | 9.077499e-003 |
| 3.400000e+001 | 9.281769e-004 |
| 3.500000e+001 | 0.000000e+000 |
| 3.600000e+001 | 0.000000e+000 |
| 3.700000e+001 | 0.000000e+000 |
| 3.800000e+001 | 0.000000e+000 |
| 3.900000e+001 | 0.000000e+000 |
| 4.000000e+001 | 0.000000e+000 |
| 4.100000e+001 | 0.000000e+000 |
| 4.200000e+001 | 0.000000e+000 |
| 4.300000e+001 | 0.000000e+000 |
| 4.400000e+001 | 0.000000e+000 |
| 4.500000e+001 | 0.000000e+000 |
| 4.600000e+001 | 0.000000e+000 |
| 4.700000e+001 | 0.000000e+000 |
| 4.800000e+001 | 0.000000e+000 |
| 4.900000e+001 | 0.000000e+000 |
| 5.000000e+001 | 0.000000e+000 |
| 5.100000e+001 | 0.000000e+000 |
| 5.200000e+001 | 0.000000e+000 |
| 5.300000e+001 | 0.000000e+000 |
| 5.400000e+001 | 0.000000e+000 |
| 5.500000e+001 | 0.000000e+000 |
| 5.600000e+001 | 0.000000e+000 |
| 5.700000e+001 | 0.000000e+000 |
| 5.800000e+001 | 0.000000e+000 |
| 5.900000e+001 | 0.000000e+000 |
| 6.000000e+001 | 0.000000e+000 |
| 140 151       |               |
| 1.000000e+000 | 0.000000e+000 |
| 2.000000e+000 | 0.000000e+000 |
| 3.000000e+000 | 0.000000e+000 |
| 4.000000e+000 | 0.000000e+000 |
| 5.000000e+000 | 0.000000e+000 |
| 6.000000e+000 | 0.000000e+000 |
| 7.000000e+000 | 0.000000e+000 |
| 8.000000e+000 | 0.000000e+000 |
| 9.000000e+000 | 0.000000e+000 |
| 1.000000e+001 | 0.000000e+000 |
| 1.100000e+001 | 0.000000e+000 |
| 1.200000e+001 | 0.000000e+000 |
| 1.300000e+001 | 0.000000e+000 |
| 1.400000e+001 | 0.000000e+000 |
| 1.500000e+001 | 1.824610e-002 |
| 1.600000e+001 | 3.122534e-002 |
| 1.700000e+001 | 4.604125e-002 |
| 1.800000e+001 | 6.114285e-002 |
| 1.900000e+001 | 7.521619e-002 |
| 2.000000e+001 | 8.720130e-002 |
| 2.100000e+001 | 9.617463e-002 |

|               |               |
|---------------|---------------|
| 2.200000e+001 | 1.012388e-001 |
| 2.300000e+001 | 1.015516e-001 |
| 2.400000e+001 | 9.682729e-002 |
| 2.500000e+001 | 8.707676e-002 |
| 2.600000e+001 | 7.297315e-002 |
| 2.700000e+001 | 5.584616e-002 |
| 2.800000e+001 | 3.768528e-002 |
| 2.900000e+001 | 2.109432e-002 |
| 3.000000e+001 | 8.631050e-003 |
| 3.100000e+001 | 1.808526e-003 |
| 3.200000e+001 | 1.932800e-005 |
| 3.300000e+001 | 0.000000e+000 |
| 3.400000e+001 | 0.000000e+000 |
| 3.500000e+001 | 0.000000e+000 |
| 3.600000e+001 | 0.000000e+000 |
| 3.700000e+001 | 0.000000e+000 |
| 3.800000e+001 | 0.000000e+000 |
| 3.900000e+001 | 0.000000e+000 |
| 4.000000e+001 | 0.000000e+000 |
| 4.100000e+001 | 0.000000e+000 |
| 4.200000e+001 | 0.000000e+000 |
| 4.300000e+001 | 0.000000e+000 |
| 4.400000e+001 | 0.000000e+000 |
| 4.500000e+001 | 0.000000e+000 |
| 4.600000e+001 | 0.000000e+000 |
| 4.700000e+001 | 0.000000e+000 |
| 4.800000e+001 | 0.000000e+000 |
| 4.900000e+001 | 0.000000e+000 |
| 5.000000e+001 | 0.000000e+000 |
| 5.100000e+001 | 0.000000e+000 |
| 5.200000e+001 | 0.000000e+000 |
| 5.300000e+001 | 0.000000e+000 |
| 5.400000e+001 | 0.000000e+000 |
| 5.500000e+001 | 0.000000e+000 |
| 5.600000e+001 | 0.000000e+000 |
| 5.700000e+001 | 0.000000e+000 |
| 5.800000e+001 | 0.000000e+000 |
| 5.900000e+001 | 0.000000e+000 |
| 6.000000e+001 | 0.000000e+000 |
| 60 90         |               |
| 1.000000e+000 | 0.000000e+000 |
| 2.000000e+000 | 0.000000e+000 |
| 3.000000e+000 | 0.000000e+000 |
| 4.000000e+000 | 0.000000e+000 |
| 5.000000e+000 | 0.000000e+000 |
| 6.000000e+000 | 0.000000e+000 |
| 7.000000e+000 | 0.000000e+000 |
| 8.000000e+000 | 0.000000e+000 |
| 9.000000e+000 | 0.000000e+000 |
| 1.000000e+001 | 0.000000e+000 |
| 1.100000e+001 | 0.000000e+000 |
| 1.200000e+001 | 0.000000e+000 |
| 1.300000e+001 | 0.000000e+000 |
| 1.400000e+001 | 0.000000e+000 |

|               |               |
|---------------|---------------|
| 1.500000e+001 | 1.782283e-003 |
| 1.600000e+001 | 1.339966e-003 |
| 1.700000e+001 | 0.000000e+000 |
| 1.800000e+001 | 0.000000e+000 |
| 1.900000e+001 | 0.000000e+000 |
| 2.000000e+001 | 8.300057e-004 |
| 2.100000e+001 | 1.991800e-003 |
| 2.200000e+001 | 8.117610e-006 |
| 2.300000e+001 | 1.487014e-003 |
| 2.400000e+001 | 1.532072e-003 |
| 2.500000e+001 | 3.892101e-003 |
| 2.600000e+001 | 4.109739e-003 |
| 2.700000e+001 | 5.425990e-004 |
| 2.800000e+001 | 0.000000e+000 |
| 2.900000e+001 | 0.000000e+000 |
| 3.000000e+001 | 0.000000e+000 |
| 3.100000e+001 | 5.213090e-003 |
| 3.200000e+001 | 3.858731e-002 |
| 3.300000e+001 | 7.920531e-002 |
| 3.400000e+001 | 8.197479e-002 |
| 3.500000e+001 | 6.776215e-002 |
| 3.600000e+001 | 8.717751e-002 |
| 3.700000e+001 | 1.364688e-001 |
| 3.800000e+001 | 1.565520e-001 |
| 3.900000e+001 | 1.168427e-001 |
| 4.000000e+001 | 5.023605e-002 |
| 4.100000e+001 | 6.986085e-003 |
| 4.200000e+001 | 2.046548e-003 |
| 4.300000e+001 | 2.123311e-002 |
| 4.400000e+001 | 4.639993e-002 |
| 4.500000e+001 | 5.101141e-002 |
| 4.600000e+001 | 2.956352e-002 |
| 4.700000e+001 | 5.224012e-003 |
| 4.800000e+001 | 0.000000e+000 |
| 4.900000e+001 | 0.000000e+000 |
| 5.000000e+001 | 0.000000e+000 |
| 5.100000e+001 | 0.000000e+000 |
| 5.200000e+001 | 0.000000e+000 |
| 5.300000e+001 | 0.000000e+000 |
| 5.400000e+001 | 0.000000e+000 |
| 5.500000e+001 | 0.000000e+000 |
| 5.600000e+001 | 0.000000e+000 |
| 5.700000e+001 | 0.000000e+000 |
| 5.800000e+001 | 0.000000e+000 |
| 5.900000e+001 | 0.000000e+000 |
| 6.000000e+001 | 0.000000e+000 |
| 61 128        |               |
| 1.000000e+000 | 0.000000e+000 |
| 2.000000e+000 | 0.000000e+000 |
| 3.000000e+000 | 0.000000e+000 |
| 4.000000e+000 | 0.000000e+000 |
| 5.000000e+000 | 0.000000e+000 |
| 6.000000e+000 | 0.000000e+000 |
| 7.000000e+000 | 0.000000e+000 |



|               |               |
|---------------|---------------|
| 8.000000e+000 | 0.000000e+000 |
| 9.000000e+000 | 0.000000e+000 |
| 1.000000e+001 | 0.000000e+000 |
| 1.100000e+001 | 0.000000e+000 |
| 1.200000e+001 | 0.000000e+000 |
| 1.300000e+001 | 0.000000e+000 |
| 1.400000e+001 | 0.000000e+000 |
| 1.500000e+001 | 0.000000e+000 |
| 1.600000e+001 | 0.000000e+000 |
| 1.700000e+001 | 0.000000e+000 |
| 1.800000e+001 | 0.000000e+000 |
| 1.900000e+001 | 0.000000e+000 |
| 2.000000e+001 | 0.000000e+000 |
| 2.100000e+001 | 0.000000e+000 |
| 2.200000e+001 | 0.000000e+000 |
| 2.300000e+001 | 0.000000e+000 |
| 2.400000e+001 | 0.000000e+000 |
| 2.500000e+001 | 0.000000e+000 |
| 2.600000e+001 | 0.000000e+000 |
| 2.700000e+001 | 0.000000e+000 |
| 2.800000e+001 | 0.000000e+000 |
| 2.900000e+001 | 0.000000e+000 |
| 3.000000e+001 | 0.000000e+000 |
| 3.100000e+001 | 0.000000e+000 |
| 3.200000e+001 | 0.000000e+000 |
| 3.300000e+001 | 0.000000e+000 |
| 3.400000e+001 | 0.000000e+000 |
| 3.500000e+001 | 0.000000e+000 |
| 3.600000e+001 | 0.000000e+000 |
| 3.700000e+001 | 0.000000e+000 |
| 3.800000e+001 | 0.000000e+000 |
| 3.900000e+001 | 0.000000e+000 |
| 4.000000e+001 | 1.505354e-004 |
| 4.100000e+001 | 7.070440e-003 |
| 4.200000e+001 | 3.703422e-002 |
| 4.300000e+001 | 8.158136e-002 |
| 4.400000e+001 | 1.253980e-001 |
| 4.500000e+001 | 1.544397e-001 |
| 4.600000e+001 | 1.598369e-001 |
| 4.700000e+001 | 1.436338e-001 |
| 4.800000e+001 | 1.140729e-001 |
| 4.900000e+001 | 8.037126e-002 |
| 5.000000e+001 | 5.026473e-002 |
| 5.100000e+001 | 2.793373e-002 |
| 5.200000e+001 | 1.314027e-002 |
| 5.300000e+001 | 4.498961e-003 |
| 5.400000e+001 | 5.733147e-004 |
| 5.500000e+001 | 0.000000e+000 |
| 5.600000e+001 | 0.000000e+000 |
| 5.700000e+001 | 0.000000e+000 |
| 5.800000e+001 | 0.000000e+000 |
| 5.900000e+001 | 0.000000e+000 |
| 6.000000e+001 | 0.000000e+000 |

61 135

|               |               |
|---------------|---------------|
| 1.000000e+000 | 0.000000e+000 |
| 2.000000e+000 | 0.000000e+000 |
| 3.000000e+000 | 0.000000e+000 |
| 4.000000e+000 | 0.000000e+000 |
| 5.000000e+000 | 0.000000e+000 |
| 6.000000e+000 | 0.000000e+000 |
| 7.000000e+000 | 0.000000e+000 |
| 8.000000e+000 | 0.000000e+000 |
| 9.000000e+000 | 0.000000e+000 |
| 1.000000e+001 | 0.000000e+000 |
| 1.100000e+001 | 0.000000e+000 |
| 1.200000e+001 | 0.000000e+000 |
| 1.300000e+001 | 0.000000e+000 |
| 1.400000e+001 | 0.000000e+000 |
| 1.500000e+001 | 0.000000e+000 |
| 1.600000e+001 | 0.000000e+000 |
| 1.700000e+001 | 0.000000e+000 |
| 1.800000e+001 | 0.000000e+000 |
| 1.900000e+001 | 0.000000e+000 |
| 2.000000e+001 | 0.000000e+000 |
| 2.100000e+001 | 0.000000e+000 |
| 2.200000e+001 | 0.000000e+000 |
| 2.300000e+001 | 0.000000e+000 |
| 2.400000e+001 | 0.000000e+000 |
| 2.500000e+001 | 0.000000e+000 |
| 2.600000e+001 | 0.000000e+000 |
| 2.700000e+001 | 0.000000e+000 |
| 2.800000e+001 | 0.000000e+000 |
| 2.900000e+001 | 0.000000e+000 |
| 3.000000e+001 | 0.000000e+000 |
| 3.100000e+001 | 0.000000e+000 |
| 3.200000e+001 | 0.000000e+000 |
| 3.300000e+001 | 0.000000e+000 |
| 3.400000e+001 | 0.000000e+000 |
| 3.500000e+001 | 0.000000e+000 |
| 3.600000e+001 | 0.000000e+000 |
| 3.700000e+001 | 0.000000e+000 |
| 3.800000e+001 | 0.000000e+000 |
| 3.900000e+001 | 0.000000e+000 |
| 4.000000e+001 | 1.406825e-002 |
| 4.100000e+001 | 6.620894e-002 |
| 4.200000e+001 | 1.369231e-001 |
| 4.300000e+001 | 1.935871e-001 |
| 4.400000e+001 | 2.128857e-001 |
| 4.500000e+001 | 1.853877e-001 |
| 4.600000e+001 | 1.240724e-001 |
| 4.700000e+001 | 5.591494e-002 |
| 4.800000e+001 | 1.095185e-002 |
| 4.900000e+001 | 0.000000e+000 |
| 5.000000e+001 | 0.000000e+000 |
| 5.100000e+001 | 0.000000e+000 |
| 5.200000e+001 | 0.000000e+000 |
| 5.300000e+001 | 0.000000e+000 |
| 5.400000e+001 | 0.000000e+000 |

|               |               |
|---------------|---------------|
| 5.500000e+001 | 0.000000e+000 |
| 5.600000e+001 | 0.000000e+000 |
| 5.700000e+001 | 0.000000e+000 |
| 5.800000e+001 | 0.000000e+000 |
| 5.900000e+001 | 0.000000e+000 |
| 6.000000e+001 | 0.000000e+000 |
| 64 122        |               |
| 1.000000e+000 | 0.000000e+000 |
| 2.000000e+000 | 0.000000e+000 |
| 3.000000e+000 | 0.000000e+000 |
| 4.000000e+000 | 0.000000e+000 |
| 5.000000e+000 | 0.000000e+000 |
| 6.000000e+000 | 0.000000e+000 |
| 7.000000e+000 | 0.000000e+000 |
| 8.000000e+000 | 0.000000e+000 |
| 9.000000e+000 | 0.000000e+000 |
| 1.000000e+001 | 0.000000e+000 |
| 1.100000e+001 | 0.000000e+000 |
| 1.200000e+001 | 0.000000e+000 |
| 1.300000e+001 | 0.000000e+000 |
| 1.400000e+001 | 0.000000e+000 |
| 1.500000e+001 | 0.000000e+000 |
| 1.600000e+001 | 0.000000e+000 |
| 1.700000e+001 | 0.000000e+000 |
| 1.800000e+001 | 0.000000e+000 |
| 1.900000e+001 | 0.000000e+000 |
| 2.000000e+001 | 0.000000e+000 |
| 2.100000e+001 | 0.000000e+000 |
| 2.200000e+001 | 0.000000e+000 |
| 2.300000e+001 | 0.000000e+000 |
| 2.400000e+001 | 0.000000e+000 |
| 2.500000e+001 | 0.000000e+000 |
| 2.600000e+001 | 0.000000e+000 |
| 2.700000e+001 | 0.000000e+000 |
| 2.800000e+001 | 0.000000e+000 |
| 2.900000e+001 | 0.000000e+000 |
| 3.000000e+001 | 0.000000e+000 |
| 3.100000e+001 | 5.582887e-003 |
| 3.200000e+001 | 2.954656e-001 |
| 3.300000e+001 | 3.557278e-001 |
| 3.400000e+001 | 6.306923e-002 |
| 3.500000e+001 | 1.545527e-002 |
| 3.600000e+001 | 7.436960e-002 |
| 3.700000e+001 | 3.699479e-002 |
| 3.800000e+001 | 3.368570e-002 |
| 3.900000e+001 | 8.875226e-002 |
| 4.000000e+001 | 3.089682e-002 |
| 4.100000e+001 | 0.000000e+000 |
| 4.200000e+001 | 0.000000e+000 |
| 4.300000e+001 | 0.000000e+000 |
| 4.400000e+001 | 0.000000e+000 |
| 4.500000e+001 | 0.000000e+000 |
| 4.600000e+001 | 0.000000e+000 |
| 4.700000e+001 | 0.000000e+000 |

|               |               |
|---------------|---------------|
| 4.800000e+001 | 0.000000e+000 |
| 4.900000e+001 | 0.000000e+000 |
| 5.000000e+001 | 0.000000e+000 |
| 5.100000e+001 | 0.000000e+000 |
| 5.200000e+001 | 0.000000e+000 |
| 5.300000e+001 | 0.000000e+000 |
| 5.400000e+001 | 0.000000e+000 |
| 5.500000e+001 | 0.000000e+000 |
| 5.600000e+001 | 0.000000e+000 |
| 5.700000e+001 | 0.000000e+000 |
| 5.800000e+001 | 0.000000e+000 |
| 5.900000e+001 | 0.000000e+000 |
| 6.000000e+001 | 0.000000e+000 |
| 65 135        |               |
| 1.000000e+000 | 0.000000e+000 |
| 2.000000e+000 | 0.000000e+000 |
| 3.000000e+000 | 0.000000e+000 |
| 4.000000e+000 | 0.000000e+000 |
| 5.000000e+000 | 0.000000e+000 |
| 6.000000e+000 | 0.000000e+000 |
| 7.000000e+000 | 0.000000e+000 |
| 8.000000e+000 | 0.000000e+000 |
| 9.000000e+000 | 0.000000e+000 |
| 1.000000e+001 | 0.000000e+000 |
| 1.100000e+001 | 0.000000e+000 |
| 1.200000e+001 | 0.000000e+000 |
| 1.300000e+001 | 0.000000e+000 |
| 1.400000e+001 | 0.000000e+000 |
| 1.500000e+001 | 0.000000e+000 |
| 1.600000e+001 | 0.000000e+000 |
| 1.700000e+001 | 1.467327e-007 |
| 1.800000e+001 | 0.000000e+000 |
| 1.900000e+001 | 0.000000e+000 |
| 2.000000e+001 | 0.000000e+000 |
| 2.100000e+001 | 0.000000e+000 |
| 2.200000e+001 | 0.000000e+000 |
| 2.300000e+001 | 0.000000e+000 |
| 2.400000e+001 | 0.000000e+000 |
| 2.500000e+001 | 0.000000e+000 |
| 2.600000e+001 | 0.000000e+000 |
| 2.700000e+001 | 0.000000e+000 |
| 2.800000e+001 | 0.000000e+000 |
| 2.900000e+001 | 0.000000e+000 |
| 3.000000e+001 | 0.000000e+000 |
| 3.100000e+001 | 0.000000e+000 |
| 3.200000e+001 | 0.000000e+000 |
| 3.300000e+001 | 0.000000e+000 |
| 3.400000e+001 | 0.000000e+000 |
| 3.500000e+001 | 0.000000e+000 |
| 3.600000e+001 | 0.000000e+000 |
| 3.700000e+001 | 0.000000e+000 |
| 3.800000e+001 | 1.503829e-004 |
| 3.900000e+001 | 3.627743e-003 |
| 4.000000e+001 | 1.422779e-002 |

|               |               |
|---------------|---------------|
| 4.100000e+001 | 3.320940e-002 |
| 4.200000e+001 | 6.008262e-002 |
| 4.300000e+001 | 9.214728e-002 |
| 4.400000e+001 | 1.235334e-001 |
| 4.500000e+001 | 1.466551e-001 |
| 4.600000e+001 | 1.543984e-001 |
| 4.700000e+001 | 1.428264e-001 |
| 4.800000e+001 | 1.131391e-001 |
| 4.900000e+001 | 7.301254e-002 |
| 5.000000e+001 | 3.433907e-002 |
| 5.100000e+001 | 8.521642e-003 |
| 5.200000e+001 | 1.290073e-004 |
| 5.300000e+001 | 0.000000e+000 |
| 5.400000e+001 | 0.000000e+000 |
| 5.500000e+001 | 0.000000e+000 |
| 5.600000e+001 | 0.000000e+000 |
| 5.700000e+001 | 0.000000e+000 |
| 5.800000e+001 | 0.000000e+000 |
| 5.900000e+001 | 0.000000e+000 |
| 6.000000e+001 | 0.000000e+000 |
| 65 76         |               |
| 1.000000e+000 | 0.000000e+000 |
| 2.000000e+000 | 0.000000e+000 |
| 3.000000e+000 | 0.000000e+000 |
| 4.000000e+000 | 0.000000e+000 |
| 5.000000e+000 | 0.000000e+000 |
| 6.000000e+000 | 0.000000e+000 |
| 7.000000e+000 | 0.000000e+000 |
| 8.000000e+000 | 0.000000e+000 |
| 9.000000e+000 | 0.000000e+000 |
| 1.000000e+001 | 0.000000e+000 |
| 1.100000e+001 | 0.000000e+000 |
| 1.200000e+001 | 0.000000e+000 |
| 1.300000e+001 | 0.000000e+000 |
| 1.400000e+001 | 0.000000e+000 |
| 1.500000e+001 | 0.000000e+000 |
| 1.600000e+001 | 1.062323e-003 |
| 1.700000e+001 | 9.528314e-003 |
| 1.800000e+001 | 2.816824e-002 |
| 1.900000e+001 | 4.951839e-002 |
| 2.000000e+001 | 7.235284e-002 |
| 2.100000e+001 | 1.032194e-001 |
| 2.200000e+001 | 1.375011e-001 |
| 2.300000e+001 | 1.576068e-001 |
| 2.400000e+001 | 1.479088e-001 |
| 2.500000e+001 | 1.168750e-001 |
| 2.600000e+001 | 7.799812e-002 |
| 2.700000e+001 | 4.236143e-002 |
| 2.800000e+001 | 2.065696e-002 |
| 2.900000e+001 | 1.291649e-002 |
| 3.000000e+001 | 9.841465e-003 |
| 3.100000e+001 | 7.049929e-003 |
| 3.200000e+001 | 4.136338e-003 |
| 3.300000e+001 | 1.275396e-003 |

|               |               |
|---------------|---------------|
| 3.400000e+001 | 2.278171e-005 |
| 3.500000e+001 | 0.000000e+000 |
| 3.600000e+001 | 0.000000e+000 |
| 3.700000e+001 | 0.000000e+000 |
| 3.800000e+001 | 0.000000e+000 |
| 3.900000e+001 | 0.000000e+000 |
| 4.000000e+001 | 0.000000e+000 |
| 4.100000e+001 | 0.000000e+000 |
| 4.200000e+001 | 0.000000e+000 |
| 4.300000e+001 | 0.000000e+000 |
| 4.400000e+001 | 0.000000e+000 |
| 4.500000e+001 | 0.000000e+000 |
| 4.600000e+001 | 0.000000e+000 |
| 4.700000e+001 | 0.000000e+000 |
| 4.800000e+001 | 0.000000e+000 |
| 4.900000e+001 | 0.000000e+000 |
| 5.000000e+001 | 0.000000e+000 |
| 5.100000e+001 | 0.000000e+000 |
| 5.200000e+001 | 0.000000e+000 |
| 5.300000e+001 | 0.000000e+000 |
| 5.400000e+001 | 0.000000e+000 |
| 5.500000e+001 | 0.000000e+000 |
| 5.600000e+001 | 0.000000e+000 |
| 5.700000e+001 | 0.000000e+000 |
| 5.800000e+001 | 0.000000e+000 |
| 5.900000e+001 | 0.000000e+000 |
| 6.000000e+001 | 0.000000e+000 |
| 72 119        |               |
| 1.000000e+000 | 0.000000e+000 |
| 2.000000e+000 | 0.000000e+000 |
| 3.000000e+000 | 0.000000e+000 |
| 4.000000e+000 | 0.000000e+000 |
| 5.000000e+000 | 0.000000e+000 |
| 6.000000e+000 | 0.000000e+000 |
| 7.000000e+000 | 0.000000e+000 |
| 8.000000e+000 | 0.000000e+000 |
| 9.000000e+000 | 0.000000e+000 |
| 1.000000e+001 | 0.000000e+000 |
| 1.100000e+001 | 0.000000e+000 |
| 1.200000e+001 | 0.000000e+000 |
| 1.300000e+001 | 0.000000e+000 |
| 1.400000e+001 | 0.000000e+000 |
| 1.500000e+001 | 0.000000e+000 |
| 1.600000e+001 | 0.000000e+000 |
| 1.700000e+001 | 0.000000e+000 |
| 1.800000e+001 | 0.000000e+000 |
| 1.900000e+001 | 0.000000e+000 |
| 2.000000e+001 | 0.000000e+000 |
| 2.100000e+001 | 9.467666e-004 |
| 2.200000e+001 | 5.978928e-002 |
| 2.300000e+001 | 1.110861e-001 |
| 2.400000e+001 | 5.367611e-002 |
| 2.500000e+001 | 3.999985e-002 |
| 2.600000e+001 | 8.104446e-002 |

|               |               |
|---------------|---------------|
| 2.700000e+001 | 5.983512e-002 |
| 2.800000e+001 | 1.055551e-001 |
| 2.900000e+001 | 1.706040e-001 |
| 3.000000e+001 | 1.163368e-001 |
| 3.100000e+001 | 4.639704e-002 |
| 3.200000e+001 | 4.192102e-002 |
| 3.300000e+001 | 4.558175e-002 |
| 3.400000e+001 | 2.363468e-002 |
| 3.500000e+001 | 8.218444e-003 |
| 3.600000e+001 | 6.286183e-003 |
| 3.700000e+001 | 5.252372e-003 |
| 3.800000e+001 | 7.839260e-003 |
| 3.900000e+001 | 1.102348e-002 |
| 4.000000e+001 | 4.972137e-003 |
| 4.100000e+001 | 0.000000e+000 |
| 4.200000e+001 | 0.000000e+000 |
| 4.300000e+001 | 0.000000e+000 |
| 4.400000e+001 | 0.000000e+000 |
| 4.500000e+001 | 0.000000e+000 |
| 4.600000e+001 | 0.000000e+000 |
| 4.700000e+001 | 0.000000e+000 |
| 4.800000e+001 | 0.000000e+000 |
| 4.900000e+001 | 0.000000e+000 |
| 5.000000e+001 | 0.000000e+000 |
| 5.100000e+001 | 0.000000e+000 |
| 5.200000e+001 | 0.000000e+000 |
| 5.300000e+001 | 0.000000e+000 |
| 5.400000e+001 | 0.000000e+000 |
| 5.500000e+001 | 0.000000e+000 |
| 5.600000e+001 | 0.000000e+000 |
| 5.700000e+001 | 0.000000e+000 |
| 5.800000e+001 | 0.000000e+000 |
| 5.900000e+001 | 0.000000e+000 |
| 6.000000e+001 | 0.000000e+000 |
| 72 131        |               |
| 1.000000e+000 | 0.000000e+000 |
| 2.000000e+000 | 0.000000e+000 |
| 3.000000e+000 | 0.000000e+000 |
| 4.000000e+000 | 0.000000e+000 |
| 5.000000e+000 | 0.000000e+000 |
| 6.000000e+000 | 0.000000e+000 |
| 7.000000e+000 | 0.000000e+000 |
| 8.000000e+000 | 0.000000e+000 |
| 9.000000e+000 | 0.000000e+000 |
| 1.000000e+001 | 0.000000e+000 |
| 1.100000e+001 | 0.000000e+000 |
| 1.200000e+001 | 0.000000e+000 |
| 1.300000e+001 | 0.000000e+000 |
| 1.400000e+001 | 0.000000e+000 |
| 1.500000e+001 | 0.000000e+000 |
| 1.600000e+001 | 0.000000e+000 |
| 1.700000e+001 | 0.000000e+000 |
| 1.800000e+001 | 0.000000e+000 |
| 1.900000e+001 | 0.000000e+000 |

|               |               |
|---------------|---------------|
| 2.000000e+001 | 0.000000e+000 |
| 2.100000e+001 | 0.000000e+000 |
| 2.200000e+001 | 0.000000e+000 |
| 2.300000e+001 | 0.000000e+000 |
| 2.400000e+001 | 0.000000e+000 |
| 2.500000e+001 | 0.000000e+000 |
| 2.600000e+001 | 0.000000e+000 |
| 2.700000e+001 | 0.000000e+000 |
| 2.800000e+001 | 0.000000e+000 |
| 2.900000e+001 | 3.558281e-004 |
| 3.000000e+001 | 9.257667e-003 |
| 3.100000e+001 | 2.399894e-002 |
| 3.200000e+001 | 5.397102e-002 |
| 3.300000e+001 | 1.003501e-001 |
| 3.400000e+001 | 1.447046e-001 |
| 3.500000e+001 | 1.692869e-001 |
| 3.600000e+001 | 1.649113e-001 |
| 3.700000e+001 | 1.338604e-001 |
| 3.800000e+001 | 9.055699e-002 |
| 3.900000e+001 | 5.389136e-002 |
| 4.000000e+001 | 3.177502e-002 |
| 4.100000e+001 | 1.750996e-002 |
| 4.200000e+001 | 5.486581e-003 |
| 4.300000e+001 | 8.340484e-005 |
| 4.400000e+001 | 0.000000e+000 |
| 4.500000e+001 | 0.000000e+000 |
| 4.600000e+001 | 0.000000e+000 |
| 4.700000e+001 | 0.000000e+000 |
| 4.800000e+001 | 0.000000e+000 |
| 4.900000e+001 | 0.000000e+000 |
| 5.000000e+001 | 0.000000e+000 |
| 5.100000e+001 | 0.000000e+000 |
| 5.200000e+001 | 0.000000e+000 |
| 5.300000e+001 | 0.000000e+000 |
| 5.400000e+001 | 0.000000e+000 |
| 5.500000e+001 | 0.000000e+000 |
| 5.600000e+001 | 0.000000e+000 |
| 5.700000e+001 | 0.000000e+000 |
| 5.800000e+001 | 0.000000e+000 |
| 5.900000e+001 | 0.000000e+000 |
| 6.000000e+001 | 0.000000e+000 |

72 151

|               |               |
|---------------|---------------|
| 1.000000e+000 | 0.000000e+000 |
| 2.000000e+000 | 0.000000e+000 |
| 3.000000e+000 | 0.000000e+000 |
| 4.000000e+000 | 0.000000e+000 |
| 5.000000e+000 | 0.000000e+000 |
| 6.000000e+000 | 0.000000e+000 |
| 7.000000e+000 | 0.000000e+000 |
| 8.000000e+000 | 0.000000e+000 |
| 9.000000e+000 | 0.000000e+000 |
| 1.000000e+001 | 0.000000e+000 |
| 1.100000e+001 | 0.000000e+000 |
| 1.200000e+001 | 0.000000e+000 |



|               |               |
|---------------|---------------|
| 1.300000e+001 | 0.000000e+000 |
| 1.400000e+001 | 0.000000e+000 |
| 1.500000e+001 | 3.731335e-003 |
| 1.600000e+001 | 0.000000e+000 |
| 1.700000e+001 | 0.000000e+000 |
| 1.800000e+001 | 0.000000e+000 |
| 1.900000e+001 | 0.000000e+000 |
| 2.000000e+001 | 0.000000e+000 |
| 2.100000e+001 | 0.000000e+000 |
| 2.200000e+001 | 0.000000e+000 |
| 2.300000e+001 | 0.000000e+000 |
| 2.400000e+001 | 0.000000e+000 |
| 2.500000e+001 | 0.000000e+000 |
| 2.600000e+001 | 2.238580e-002 |
| 2.700000e+001 | 8.491443e-002 |
| 2.800000e+001 | 8.740536e-002 |
| 2.900000e+001 | 5.708031e-002 |
| 3.000000e+001 | 9.143608e-002 |
| 3.100000e+001 | 1.213010e-001 |
| 3.200000e+001 | 1.137724e-001 |
| 3.300000e+001 | 1.231558e-001 |
| 3.400000e+001 | 1.402667e-001 |
| 3.500000e+001 | 1.010606e-001 |
| 3.600000e+001 | 2.754096e-002 |
| 3.700000e+001 | 0.000000e+000 |
| 3.800000e+001 | 0.000000e+000 |
| 3.900000e+001 | 0.000000e+000 |
| 4.000000e+001 | 0.000000e+000 |
| 4.100000e+001 | 0.000000e+000 |
| 4.200000e+001 | 3.565596e-004 |
| 4.300000e+001 | 7.729600e-003 |
| 4.400000e+001 | 1.266205e-002 |
| 4.500000e+001 | 5.180482e-003 |
| 4.600000e+001 | 2.055324e-005 |
| 4.700000e+001 | 0.000000e+000 |
| 4.800000e+001 | 0.000000e+000 |
| 4.900000e+001 | 0.000000e+000 |
| 5.000000e+001 | 0.000000e+000 |
| 5.100000e+001 | 0.000000e+000 |
| 5.200000e+001 | 0.000000e+000 |
| 5.300000e+001 | 0.000000e+000 |
| 5.400000e+001 | 0.000000e+000 |
| 5.500000e+001 | 0.000000e+000 |
| 5.600000e+001 | 0.000000e+000 |
| 5.700000e+001 | 0.000000e+000 |
| 5.800000e+001 | 0.000000e+000 |
| 5.900000e+001 | 0.000000e+000 |
| 6.000000e+001 | 0.000000e+000 |
| 75 119        |               |
| 1.000000e+000 | 0.000000e+000 |
| 2.000000e+000 | 0.000000e+000 |
| 3.000000e+000 | 0.000000e+000 |
| 4.000000e+000 | 0.000000e+000 |
| 5.000000e+000 | 0.000000e+000 |

|               |               |
|---------------|---------------|
| 6.000000e+000 | 0.000000e+000 |
| 7.000000e+000 | 0.000000e+000 |
| 8.000000e+000 | 0.000000e+000 |
| 9.000000e+000 | 0.000000e+000 |
| 1.000000e+001 | 0.000000e+000 |
| 1.100000e+001 | 0.000000e+000 |
| 1.200000e+001 | 0.000000e+000 |
| 1.300000e+001 | 0.000000e+000 |
| 1.400000e+001 | 0.000000e+000 |
| 1.500000e+001 | 0.000000e+000 |
| 1.600000e+001 | 0.000000e+000 |
| 1.700000e+001 | 0.000000e+000 |
| 1.800000e+001 | 1.112822e-001 |
| 1.900000e+001 | 1.132129e-001 |
| 2.000000e+001 | 6.539156e-002 |
| 2.100000e+001 | 5.837229e-002 |
| 2.200000e+001 | 6.096069e-002 |
| 2.300000e+001 | 7.941512e-002 |
| 2.400000e+001 | 1.310042e-001 |
| 2.500000e+001 | 1.006791e-001 |
| 2.600000e+001 | 1.092358e-001 |
| 2.700000e+001 | 3.317217e-002 |
| 2.800000e+001 | 2.352730e-002 |
| 2.900000e+001 | 4.776552e-002 |
| 3.000000e+001 | 4.084699e-002 |
| 3.100000e+001 | 1.879442e-002 |
| 3.200000e+001 | 5.298630e-003 |
| 3.300000e+001 | 0.000000e+000 |
| 3.400000e+001 | 0.000000e+000 |
| 3.500000e+001 | 0.000000e+000 |
| 3.600000e+001 | 0.000000e+000 |
| 3.700000e+001 | 0.000000e+000 |
| 3.800000e+001 | 0.000000e+000 |
| 3.900000e+001 | 0.000000e+000 |
| 4.000000e+001 | 6.812097e-005 |
| 4.100000e+001 | 9.729144e-004 |
| 4.200000e+001 | 0.000000e+000 |
| 4.300000e+001 | 0.000000e+000 |
| 4.400000e+001 | 0.000000e+000 |
| 4.500000e+001 | 0.000000e+000 |
| 4.600000e+001 | 0.000000e+000 |
| 4.700000e+001 | 0.000000e+000 |
| 4.800000e+001 | 0.000000e+000 |
| 4.900000e+001 | 0.000000e+000 |
| 5.000000e+001 | 0.000000e+000 |
| 5.100000e+001 | 0.000000e+000 |
| 5.200000e+001 | 0.000000e+000 |
| 5.300000e+001 | 0.000000e+000 |
| 5.400000e+001 | 0.000000e+000 |
| 5.500000e+001 | 0.000000e+000 |
| 5.600000e+001 | 0.000000e+000 |
| 5.700000e+001 | 0.000000e+000 |
| 5.800000e+001 | 0.000000e+000 |
| 5.900000e+001 | 0.000000e+000 |

|               |               |
|---------------|---------------|
| 6.000000e+001 | 0.000000e+000 |
| 75 131        |               |
| 1.000000e+000 | 0.000000e+000 |
| 2.000000e+000 | 0.000000e+000 |
| 3.000000e+000 | 0.000000e+000 |
| 4.000000e+000 | 0.000000e+000 |
| 5.000000e+000 | 0.000000e+000 |
| 6.000000e+000 | 0.000000e+000 |
| 7.000000e+000 | 0.000000e+000 |
| 8.000000e+000 | 0.000000e+000 |
| 9.000000e+000 | 0.000000e+000 |
| 1.000000e+001 | 0.000000e+000 |
| 1.100000e+001 | 0.000000e+000 |
| 1.200000e+001 | 0.000000e+000 |
| 1.300000e+001 | 0.000000e+000 |
| 1.400000e+001 | 0.000000e+000 |
| 1.500000e+001 | 1.519258e-002 |
| 1.600000e+001 | 1.011924e-002 |
| 1.700000e+001 | 1.721388e-004 |
| 1.800000e+001 | 0.000000e+000 |
| 1.900000e+001 | 0.000000e+000 |
| 2.000000e+001 | 0.000000e+000 |
| 2.100000e+001 | 0.000000e+000 |
| 2.200000e+001 | 0.000000e+000 |
| 2.300000e+001 | 0.000000e+000 |
| 2.400000e+001 | 0.000000e+000 |
| 2.500000e+001 | 0.000000e+000 |
| 2.600000e+001 | 0.000000e+000 |
| 2.700000e+001 | 0.000000e+000 |
| 2.800000e+001 | 0.000000e+000 |
| 2.900000e+001 | 1.340981e-002 |
| 3.000000e+001 | 1.050401e-001 |
| 3.100000e+001 | 1.774445e-001 |
| 3.200000e+001 | 1.694520e-001 |
| 3.300000e+001 | 1.539120e-001 |
| 3.400000e+001 | 1.515503e-001 |
| 3.500000e+001 | 1.095118e-001 |
| 3.600000e+001 | 3.348521e-002 |
| 3.700000e+001 | 1.613045e-004 |
| 3.800000e+001 | 0.000000e+000 |
| 3.900000e+001 | 0.000000e+000 |
| 4.000000e+001 | 2.643540e-003 |
| 4.100000e+001 | 2.048647e-002 |
| 4.200000e+001 | 2.745503e-002 |
| 4.300000e+001 | 9.964051e-003 |
| 4.400000e+001 | 0.000000e+000 |
| 4.500000e+001 | 0.000000e+000 |
| 4.600000e+001 | 0.000000e+000 |
| 4.700000e+001 | 0.000000e+000 |
| 4.800000e+001 | 0.000000e+000 |
| 4.900000e+001 | 0.000000e+000 |
| 5.000000e+001 | 0.000000e+000 |
| 5.100000e+001 | 0.000000e+000 |
| 5.200000e+001 | 0.000000e+000 |

|               |               |
|---------------|---------------|
| 5.300000e+001 | 0.000000e+000 |
| 5.400000e+001 | 0.000000e+000 |
| 5.500000e+001 | 0.000000e+000 |
| 5.600000e+001 | 0.000000e+000 |
| 5.700000e+001 | 0.000000e+000 |
| 5.800000e+001 | 0.000000e+000 |
| 5.900000e+001 | 0.000000e+000 |
| 6.000000e+001 | 0.000000e+000 |
| 75 151        |               |
| 1.000000e+000 | 0.000000e+000 |
| 2.000000e+000 | 0.000000e+000 |
| 3.000000e+000 | 0.000000e+000 |
| 4.000000e+000 | 0.000000e+000 |
| 5.000000e+000 | 0.000000e+000 |
| 6.000000e+000 | 0.000000e+000 |
| 7.000000e+000 | 0.000000e+000 |
| 8.000000e+000 | 0.000000e+000 |
| 9.000000e+000 | 0.000000e+000 |
| 1.000000e+001 | 0.000000e+000 |
| 1.100000e+001 | 0.000000e+000 |
| 1.200000e+001 | 0.000000e+000 |
| 1.300000e+001 | 0.000000e+000 |
| 1.400000e+001 | 0.000000e+000 |
| 1.500000e+001 | 0.000000e+000 |
| 1.600000e+001 | 0.000000e+000 |
| 1.700000e+001 | 0.000000e+000 |
| 1.800000e+001 | 0.000000e+000 |
| 1.900000e+001 | 0.000000e+000 |
| 2.000000e+001 | 0.000000e+000 |
| 2.100000e+001 | 0.000000e+000 |
| 2.200000e+001 | 0.000000e+000 |
| 2.300000e+001 | 0.000000e+000 |
| 2.400000e+001 | 2.634589e-003 |
| 2.500000e+001 | 2.171155e-002 |
| 2.600000e+001 | 4.006377e-002 |
| 2.700000e+001 | 5.523438e-002 |
| 2.800000e+001 | 9.609980e-002 |
| 2.900000e+001 | 1.515186e-001 |
| 3.000000e+001 | 2.313568e-001 |
| 3.100000e+001 | 2.373427e-001 |
| 3.200000e+001 | 1.207689e-001 |
| 3.300000e+001 | 1.481325e-002 |
| 3.400000e+001 | 0.000000e+000 |
| 3.500000e+001 | 0.000000e+000 |
| 3.600000e+001 | 0.000000e+000 |
| 3.700000e+001 | 0.000000e+000 |
| 3.800000e+001 | 5.939894e-004 |
| 3.900000e+001 | 2.075898e-003 |
| 4.000000e+001 | 1.885100e-003 |
| 4.100000e+001 | 3.406201e-003 |
| 4.200000e+001 | 7.408933e-003 |
| 4.300000e+001 | 8.607838e-003 |
| 4.400000e+001 | 4.244007e-003 |
| 4.500000e+001 | 2.337354e-004 |

|               |               |
|---------------|---------------|
| 4.600000e+001 | 0.000000e+000 |
| 4.700000e+001 | 0.000000e+000 |
| 4.800000e+001 | 0.000000e+000 |
| 4.900000e+001 | 0.000000e+000 |
| 5.000000e+001 | 0.000000e+000 |
| 5.100000e+001 | 0.000000e+000 |
| 5.200000e+001 | 0.000000e+000 |
| 5.300000e+001 | 0.000000e+000 |
| 5.400000e+001 | 0.000000e+000 |
| 5.500000e+001 | 0.000000e+000 |
| 5.600000e+001 | 0.000000e+000 |
| 5.700000e+001 | 0.000000e+000 |
| 5.800000e+001 | 0.000000e+000 |
| 5.900000e+001 | 0.000000e+000 |
| 6.000000e+001 | 0.000000e+000 |
| 76 119        |               |
| 1.000000e+000 | 0.000000e+000 |
| 2.000000e+000 | 0.000000e+000 |
| 3.000000e+000 | 0.000000e+000 |
| 4.000000e+000 | 0.000000e+000 |
| 5.000000e+000 | 0.000000e+000 |
| 6.000000e+000 | 0.000000e+000 |
| 7.000000e+000 | 0.000000e+000 |
| 8.000000e+000 | 0.000000e+000 |
| 9.000000e+000 | 0.000000e+000 |
| 1.000000e+001 | 0.000000e+000 |
| 1.100000e+001 | 0.000000e+000 |
| 1.200000e+001 | 0.000000e+000 |
| 1.300000e+001 | 0.000000e+000 |
| 1.400000e+001 | 0.000000e+000 |
| 1.500000e+001 | 0.000000e+000 |
| 1.600000e+001 | 0.000000e+000 |
| 1.700000e+001 | 4.193439e-004 |
| 1.800000e+001 | 1.729497e-002 |
| 1.900000e+001 | 4.670824e-002 |
| 2.000000e+001 | 3.793869e-002 |
| 2.100000e+001 | 1.907493e-002 |
| 2.200000e+001 | 2.747992e-002 |
| 2.300000e+001 | 6.543802e-002 |
| 2.400000e+001 | 8.783275e-002 |
| 2.500000e+001 | 8.048639e-002 |
| 2.600000e+001 | 7.543279e-002 |
| 2.700000e+001 | 1.039817e-001 |
| 2.800000e+001 | 1.326706e-001 |
| 2.900000e+001 | 1.068653e-001 |
| 3.000000e+001 | 6.850494e-002 |
| 3.100000e+001 | 5.679967e-002 |
| 3.200000e+001 | 4.592178e-002 |
| 3.300000e+001 | 1.756664e-002 |
| 3.400000e+001 | 3.031764e-004 |
| 3.500000e+001 | 0.000000e+000 |
| 3.600000e+001 | 0.000000e+000 |
| 3.700000e+001 | 7.459686e-004 |
| 3.800000e+001 | 5.007454e-003 |

|               |               |
|---------------|---------------|
| 3.900000e+001 | 3.526709e-003 |
| 4.000000e+001 | 0.000000e+000 |
| 4.100000e+001 | 0.000000e+000 |
| 4.200000e+001 | 0.000000e+000 |
| 4.300000e+001 | 0.000000e+000 |
| 4.400000e+001 | 0.000000e+000 |
| 4.500000e+001 | 0.000000e+000 |
| 4.600000e+001 | 0.000000e+000 |
| 4.700000e+001 | 0.000000e+000 |
| 4.800000e+001 | 0.000000e+000 |
| 4.900000e+001 | 0.000000e+000 |
| 5.000000e+001 | 0.000000e+000 |
| 5.100000e+001 | 0.000000e+000 |
| 5.200000e+001 | 0.000000e+000 |
| 5.300000e+001 | 0.000000e+000 |
| 5.400000e+001 | 0.000000e+000 |
| 5.500000e+001 | 0.000000e+000 |
| 5.600000e+001 | 0.000000e+000 |
| 5.700000e+001 | 0.000000e+000 |
| 5.800000e+001 | 0.000000e+000 |
| 5.900000e+001 | 0.000000e+000 |
| 6.000000e+001 | 0.000000e+000 |
| 76 131        |               |
| 1.000000e+000 | 0.000000e+000 |
| 2.000000e+000 | 0.000000e+000 |
| 3.000000e+000 | 0.000000e+000 |
| 4.000000e+000 | 0.000000e+000 |
| 5.000000e+000 | 0.000000e+000 |
| 6.000000e+000 | 0.000000e+000 |
| 7.000000e+000 | 0.000000e+000 |
| 8.000000e+000 | 0.000000e+000 |
| 9.000000e+000 | 0.000000e+000 |
| 1.000000e+001 | 0.000000e+000 |
| 1.100000e+001 | 0.000000e+000 |
| 1.200000e+001 | 0.000000e+000 |
| 1.300000e+001 | 0.000000e+000 |
| 1.400000e+001 | 0.000000e+000 |
| 1.500000e+001 | 0.000000e+000 |
| 1.600000e+001 | 0.000000e+000 |
| 1.700000e+001 | 0.000000e+000 |
| 1.800000e+001 | 0.000000e+000 |
| 1.900000e+001 | 0.000000e+000 |
| 2.000000e+001 | 0.000000e+000 |
| 2.100000e+001 | 0.000000e+000 |
| 2.200000e+001 | 0.000000e+000 |
| 2.300000e+001 | 0.000000e+000 |
| 2.400000e+001 | 0.000000e+000 |
| 2.500000e+001 | 0.000000e+000 |
| 2.600000e+001 | 0.000000e+000 |
| 2.700000e+001 | 0.000000e+000 |
| 2.800000e+001 | 0.000000e+000 |
| 2.900000e+001 | 0.000000e+000 |
| 3.000000e+001 | 0.000000e+000 |
| 3.100000e+001 | 0.000000e+000 |

|               |               |
|---------------|---------------|
| 3.200000e+001 | 0.000000e+000 |
| 3.300000e+001 | 0.000000e+000 |
| 3.400000e+001 | 6.082383e-002 |
| 3.500000e+001 | 2.646547e-001 |
| 3.600000e+001 | 3.179187e-001 |
| 3.700000e+001 | 1.784604e-001 |
| 3.800000e+001 | 4.204858e-002 |
| 3.900000e+001 | 1.466613e-002 |
| 4.000000e+001 | 4.819070e-002 |
| 4.100000e+001 | 5.488505e-002 |
| 4.200000e+001 | 1.782153e-002 |
| 4.300000e+001 | 0.000000e+000 |
| 4.400000e+001 | 0.000000e+000 |
| 4.500000e+001 | 0.000000e+000 |
| 4.600000e+001 | 0.000000e+000 |
| 4.700000e+001 | 0.000000e+000 |
| 4.800000e+001 | 0.000000e+000 |
| 4.900000e+001 | 0.000000e+000 |
| 5.000000e+001 | 0.000000e+000 |
| 5.100000e+001 | 0.000000e+000 |
| 5.200000e+001 | 0.000000e+000 |
| 5.300000e+001 | 0.000000e+000 |
| 5.400000e+001 | 0.000000e+000 |
| 5.500000e+001 | 0.000000e+000 |
| 5.600000e+001 | 0.000000e+000 |
| 5.700000e+001 | 0.000000e+000 |
| 5.800000e+001 | 0.000000e+000 |
| 5.900000e+001 | 0.000000e+000 |
| 6.000000e+001 | 0.000000e+000 |
| 76 151        |               |
| 1.000000e+000 | 0.000000e+000 |
| 2.000000e+000 | 0.000000e+000 |
| 3.000000e+000 | 0.000000e+000 |
| 4.000000e+000 | 0.000000e+000 |
| 5.000000e+000 | 0.000000e+000 |
| 6.000000e+000 | 0.000000e+000 |
| 7.000000e+000 | 0.000000e+000 |
| 8.000000e+000 | 0.000000e+000 |
| 9.000000e+000 | 0.000000e+000 |
| 1.000000e+001 | 0.000000e+000 |
| 1.100000e+001 | 0.000000e+000 |
| 1.200000e+001 | 0.000000e+000 |
| 1.300000e+001 | 0.000000e+000 |
| 1.400000e+001 | 0.000000e+000 |
| 1.500000e+001 | 0.000000e+000 |
| 1.600000e+001 | 0.000000e+000 |
| 1.700000e+001 | 0.000000e+000 |
| 1.800000e+001 | 0.000000e+000 |
| 1.900000e+001 | 0.000000e+000 |
| 2.000000e+001 | 0.000000e+000 |
| 2.100000e+001 | 0.000000e+000 |
| 2.200000e+001 | 0.000000e+000 |
| 2.300000e+001 | 0.000000e+000 |
| 2.400000e+001 | 0.000000e+000 |

|               |               |
|---------------|---------------|
| 2.500000e+001 | 0.000000e+000 |
| 2.600000e+001 | 0.000000e+000 |
| 2.700000e+001 | 0.000000e+000 |
| 2.800000e+001 | 0.000000e+000 |
| 2.900000e+001 | 0.000000e+000 |
| 3.000000e+001 | 0.000000e+000 |
| 3.100000e+001 | 0.000000e+000 |
| 3.200000e+001 | 6.720735e-006 |
| 3.300000e+001 | 3.230891e-002 |
| 3.400000e+001 | 1.322075e-001 |
| 3.500000e+001 | 2.079869e-001 |
| 3.600000e+001 | 2.416273e-001 |
| 3.700000e+001 | 2.266008e-001 |
| 3.800000e+001 | 1.341712e-001 |
| 3.900000e+001 | 2.502827e-002 |
| 4.000000e+001 | 0.000000e+000 |
| 4.100000e+001 | 0.000000e+000 |
| 4.200000e+001 | 0.000000e+000 |
| 4.300000e+001 | 0.000000e+000 |
| 4.400000e+001 | 0.000000e+000 |
| 4.500000e+001 | 0.000000e+000 |
| 4.600000e+001 | 0.000000e+000 |
| 4.700000e+001 | 4.039199e-005 |
| 4.800000e+001 | 2.192670e-005 |
| 4.900000e+001 | 0.000000e+000 |
| 5.000000e+001 | 0.000000e+000 |
| 5.100000e+001 | 0.000000e+000 |
| 5.200000e+001 | 0.000000e+000 |
| 5.300000e+001 | 0.000000e+000 |
| 5.400000e+001 | 0.000000e+000 |
| 5.500000e+001 | 0.000000e+000 |
| 5.600000e+001 | 0.000000e+000 |
| 5.700000e+001 | 0.000000e+000 |
| 5.800000e+001 | 0.000000e+000 |
| 5.900000e+001 | 0.000000e+000 |
| 6.000000e+001 | 0.000000e+000 |
| 79 119        |               |
| 1.000000e+000 | 0.000000e+000 |
| 2.000000e+000 | 0.000000e+000 |
| 3.000000e+000 | 0.000000e+000 |
| 4.000000e+000 | 0.000000e+000 |
| 5.000000e+000 | 0.000000e+000 |
| 6.000000e+000 | 0.000000e+000 |
| 7.000000e+000 | 0.000000e+000 |
| 8.000000e+000 | 0.000000e+000 |
| 9.000000e+000 | 0.000000e+000 |
| 1.000000e+001 | 0.000000e+000 |
| 1.100000e+001 | 0.000000e+000 |
| 1.200000e+001 | 0.000000e+000 |
| 1.300000e+001 | 0.000000e+000 |
| 1.400000e+001 | 0.000000e+000 |
| 1.500000e+001 | 0.000000e+000 |
| 1.600000e+001 | 0.000000e+000 |
| 1.700000e+001 | 0.000000e+000 |



|               |               |
|---------------|---------------|
| 1.800000e+001 | 1.729513e-002 |
| 1.900000e+001 | 1.151916e-001 |
| 2.000000e+001 | 1.156709e-001 |
| 2.100000e+001 | 1.135076e-001 |
| 2.200000e+001 | 8.803254e-002 |
| 2.300000e+001 | 6.869623e-002 |
| 2.400000e+001 | 6.350966e-002 |
| 2.500000e+001 | 9.226713e-002 |
| 2.600000e+001 | 9.977337e-002 |
| 2.700000e+001 | 7.516567e-002 |
| 2.800000e+001 | 7.070353e-002 |
| 2.900000e+001 | 3.899943e-002 |
| 3.000000e+001 | 3.576030e-003 |
| 3.100000e+001 | 6.732968e-003 |
| 3.200000e+001 | 4.333954e-003 |
| 3.300000e+001 | 0.000000e+000 |
| 3.400000e+001 | 0.000000e+000 |
| 3.500000e+001 | 0.000000e+000 |
| 3.600000e+001 | 0.000000e+000 |
| 3.700000e+001 | 0.000000e+000 |
| 3.800000e+001 | 0.000000e+000 |
| 3.900000e+001 | 0.000000e+000 |
| 4.000000e+001 | 1.674151e-003 |
| 4.100000e+001 | 1.052367e-002 |
| 4.200000e+001 | 9.867754e-003 |
| 4.300000e+001 | 1.894617e-003 |
| 4.400000e+001 | 0.000000e+000 |
| 4.500000e+001 | 0.000000e+000 |
| 4.600000e+001 | 0.000000e+000 |
| 4.700000e+001 | 0.000000e+000 |
| 4.800000e+001 | 0.000000e+000 |
| 4.900000e+001 | 0.000000e+000 |
| 5.000000e+001 | 0.000000e+000 |
| 5.100000e+001 | 0.000000e+000 |
| 5.200000e+001 | 0.000000e+000 |
| 5.300000e+001 | 0.000000e+000 |
| 5.400000e+001 | 0.000000e+000 |
| 5.500000e+001 | 0.000000e+000 |
| 5.600000e+001 | 0.000000e+000 |
| 5.700000e+001 | 0.000000e+000 |
| 5.800000e+001 | 0.000000e+000 |
| 5.900000e+001 | 0.000000e+000 |
| 6.000000e+001 | 0.000000e+000 |
| 79 131        |               |
| 1.000000e+000 | 0.000000e+000 |
| 2.000000e+000 | 0.000000e+000 |
| 3.000000e+000 | 0.000000e+000 |
| 4.000000e+000 | 0.000000e+000 |
| 5.000000e+000 | 0.000000e+000 |
| 6.000000e+000 | 0.000000e+000 |
| 7.000000e+000 | 0.000000e+000 |
| 8.000000e+000 | 0.000000e+000 |
| 9.000000e+000 | 0.000000e+000 |
| 1.000000e+001 | 0.000000e+000 |

|               |               |
|---------------|---------------|
| 1.100000e+001 | 0.000000e+000 |
| 1.200000e+001 | 0.000000e+000 |
| 1.300000e+001 | 0.000000e+000 |
| 1.400000e+001 | 0.000000e+000 |
| 1.500000e+001 | 0.000000e+000 |
| 1.600000e+001 | 6.204513e-004 |
| 1.700000e+001 | 1.327953e-005 |
| 1.800000e+001 | 0.000000e+000 |
| 1.900000e+001 | 5.209841e-004 |
| 2.000000e+001 | 5.457077e-003 |
| 2.100000e+001 | 6.790648e-003 |
| 2.200000e+001 | 4.428927e-004 |
| 2.300000e+001 | 0.000000e+000 |
| 2.400000e+001 | 0.000000e+000 |
| 2.500000e+001 | 0.000000e+000 |
| 2.600000e+001 | 0.000000e+000 |
| 2.700000e+001 | 0.000000e+000 |
| 2.800000e+001 | 3.574541e-004 |
| 2.900000e+001 | 4.202070e-002 |
| 3.000000e+001 | 1.097110e-001 |
| 3.100000e+001 | 1.129228e-001 |
| 3.200000e+001 | 1.060656e-001 |
| 3.300000e+001 | 1.444934e-001 |
| 3.400000e+001 | 1.751218e-001 |
| 3.500000e+001 | 1.457573e-001 |
| 3.600000e+001 | 8.516010e-002 |
| 3.700000e+001 | 3.806179e-002 |
| 3.800000e+001 | 1.281978e-002 |
| 3.900000e+001 | 1.665805e-003 |
| 4.000000e+001 | 2.687132e-004 |
| 4.100000e+001 | 3.095627e-003 |
| 4.200000e+001 | 4.220620e-003 |
| 4.300000e+001 | 1.837812e-003 |
| 4.400000e+001 | 5.210957e-005 |
| 4.500000e+001 | 8.987533e-005 |
| 4.600000e+001 | 1.027380e-003 |
| 4.700000e+001 | 1.221833e-003 |
| 4.800000e+001 | 1.833160e-004 |
| 4.900000e+001 | 0.000000e+000 |
| 5.000000e+001 | 0.000000e+000 |
| 5.100000e+001 | 0.000000e+000 |
| 5.200000e+001 | 0.000000e+000 |
| 5.300000e+001 | 0.000000e+000 |
| 5.400000e+001 | 0.000000e+000 |
| 5.500000e+001 | 0.000000e+000 |
| 5.600000e+001 | 0.000000e+000 |
| 5.700000e+001 | 0.000000e+000 |
| 5.800000e+001 | 0.000000e+000 |
| 5.900000e+001 | 0.000000e+000 |
| 6.000000e+001 | 0.000000e+000 |

83 155

|               |               |
|---------------|---------------|
| 1.000000e+000 | 0.000000e+000 |
| 2.000000e+000 | 0.000000e+000 |
| 3.000000e+000 | 0.000000e+000 |

|               |               |
|---------------|---------------|
| 4.000000e+000 | 0.000000e+000 |
| 5.000000e+000 | 0.000000e+000 |
| 6.000000e+000 | 0.000000e+000 |
| 7.000000e+000 | 0.000000e+000 |
| 8.000000e+000 | 0.000000e+000 |
| 9.000000e+000 | 0.000000e+000 |
| 1.000000e+001 | 0.000000e+000 |
| 1.100000e+001 | 0.000000e+000 |
| 1.200000e+001 | 0.000000e+000 |
| 1.300000e+001 | 0.000000e+000 |
| 1.400000e+001 | 0.000000e+000 |
| 1.500000e+001 | 0.000000e+000 |
| 1.600000e+001 | 0.000000e+000 |
| 1.700000e+001 | 0.000000e+000 |
| 1.800000e+001 | 0.000000e+000 |
| 1.900000e+001 | 0.000000e+000 |
| 2.000000e+001 | 0.000000e+000 |
| 2.100000e+001 | 0.000000e+000 |
| 2.200000e+001 | 0.000000e+000 |
| 2.300000e+001 | 0.000000e+000 |
| 2.400000e+001 | 0.000000e+000 |
| 2.500000e+001 | 0.000000e+000 |
| 2.600000e+001 | 8.208411e-003 |
| 2.700000e+001 | 3.410996e-002 |
| 2.800000e+001 | 4.204171e-002 |
| 2.900000e+001 | 2.894535e-002 |
| 3.000000e+001 | 2.636605e-003 |
| 3.100000e+001 | 4.926503e-002 |
| 3.200000e+001 | 1.699897e-001 |
| 3.300000e+001 | 2.627564e-001 |
| 3.400000e+001 | 2.459690e-001 |
| 3.500000e+001 | 1.307785e-001 |
| 3.600000e+001 | 2.152642e-002 |
| 3.700000e+001 | 0.000000e+000 |
| 3.800000e+001 | 0.000000e+000 |
| 3.900000e+001 | 0.000000e+000 |
| 4.000000e+001 | 0.000000e+000 |
| 4.100000e+001 | 0.000000e+000 |
| 4.200000e+001 | 0.000000e+000 |
| 4.300000e+001 | 0.000000e+000 |
| 4.400000e+001 | 0.000000e+000 |
| 4.500000e+001 | 0.000000e+000 |
| 4.600000e+001 | 0.000000e+000 |
| 4.700000e+001 | 0.000000e+000 |
| 4.800000e+001 | 0.000000e+000 |
| 4.900000e+001 | 0.000000e+000 |
| 5.000000e+001 | 0.000000e+000 |
| 5.100000e+001 | 0.000000e+000 |
| 5.200000e+001 | 0.000000e+000 |
| 5.300000e+001 | 0.000000e+000 |
| 5.400000e+001 | 0.000000e+000 |
| 5.500000e+001 | 0.000000e+000 |
| 5.600000e+001 | 0.000000e+000 |
| 5.700000e+001 | 0.000000e+000 |

|               |               |
|---------------|---------------|
| 5.800000e+001 | 0.000000e+000 |
| 5.900000e+001 | 0.000000e+000 |
| 6.000000e+001 | 0.000000e+000 |
| 85 119        |               |
| 1.000000e+000 | 0.000000e+000 |
| 2.000000e+000 | 0.000000e+000 |
| 3.000000e+000 | 0.000000e+000 |
| 4.000000e+000 | 0.000000e+000 |
| 5.000000e+000 | 0.000000e+000 |
| 6.000000e+000 | 0.000000e+000 |
| 7.000000e+000 | 0.000000e+000 |
| 8.000000e+000 | 0.000000e+000 |
| 9.000000e+000 | 0.000000e+000 |
| 1.000000e+001 | 0.000000e+000 |
| 1.100000e+001 | 0.000000e+000 |
| 1.200000e+001 | 0.000000e+000 |
| 1.300000e+001 | 0.000000e+000 |
| 1.400000e+001 | 0.000000e+000 |
| 1.500000e+001 | 2.836295e-002 |
| 1.600000e+001 | 7.565146e-002 |
| 1.700000e+001 | 8.636360e-002 |
| 1.800000e+001 | 9.145197e-002 |
| 1.900000e+001 | 1.750157e-001 |
| 2.000000e+001 | 2.197948e-001 |
| 2.100000e+001 | 1.406859e-001 |
| 2.200000e+001 | 4.621219e-002 |
| 2.300000e+001 | 2.776968e-002 |
| 2.400000e+001 | 3.074137e-002 |
| 2.500000e+001 | 1.454727e-002 |
| 2.600000e+001 | 8.764216e-003 |
| 2.700000e+001 | 1.444045e-002 |
| 2.800000e+001 | 1.223133e-002 |
| 2.900000e+001 | 6.382424e-003 |
| 3.000000e+001 | 3.591321e-003 |
| 3.100000e+001 | 6.928393e-003 |
| 3.200000e+001 | 8.319405e-003 |
| 3.300000e+001 | 2.745510e-003 |
| 3.400000e+001 | 0.000000e+000 |
| 3.500000e+001 | 0.000000e+000 |
| 3.600000e+001 | 0.000000e+000 |
| 3.700000e+001 | 0.000000e+000 |
| 3.800000e+001 | 0.000000e+000 |
| 3.900000e+001 | 0.000000e+000 |
| 4.000000e+001 | 0.000000e+000 |
| 4.100000e+001 | 0.000000e+000 |
| 4.200000e+001 | 0.000000e+000 |
| 4.300000e+001 | 0.000000e+000 |
| 4.400000e+001 | 0.000000e+000 |
| 4.500000e+001 | 0.000000e+000 |
| 4.600000e+001 | 0.000000e+000 |
| 4.700000e+001 | 0.000000e+000 |
| 4.800000e+001 | 0.000000e+000 |
| 4.900000e+001 | 0.000000e+000 |
| 5.000000e+001 | 0.000000e+000 |

|               |               |
|---------------|---------------|
| 5.100000e+001 | 0.000000e+000 |
| 5.200000e+001 | 0.000000e+000 |
| 5.300000e+001 | 0.000000e+000 |
| 5.400000e+001 | 0.000000e+000 |
| 5.500000e+001 | 0.000000e+000 |
| 5.600000e+001 | 0.000000e+000 |
| 5.700000e+001 | 0.000000e+000 |
| 5.800000e+001 | 0.000000e+000 |
| 5.900000e+001 | 0.000000e+000 |
| 6.000000e+001 | 0.000000e+000 |
| 85 131        |               |
| 1.000000e+000 | 0.000000e+000 |
| 2.000000e+000 | 0.000000e+000 |
| 3.000000e+000 | 0.000000e+000 |
| 4.000000e+000 | 0.000000e+000 |
| 5.000000e+000 | 0.000000e+000 |
| 6.000000e+000 | 0.000000e+000 |
| 7.000000e+000 | 0.000000e+000 |
| 8.000000e+000 | 0.000000e+000 |
| 9.000000e+000 | 0.000000e+000 |
| 1.000000e+001 | 0.000000e+000 |
| 1.100000e+001 | 0.000000e+000 |
| 1.200000e+001 | 0.000000e+000 |
| 1.300000e+001 | 0.000000e+000 |
| 1.400000e+001 | 0.000000e+000 |
| 1.500000e+001 | 0.000000e+000 |
| 1.600000e+001 | 0.000000e+000 |
| 1.700000e+001 | 0.000000e+000 |
| 1.800000e+001 | 0.000000e+000 |
| 1.900000e+001 | 0.000000e+000 |
| 2.000000e+001 | 0.000000e+000 |
| 2.100000e+001 | 0.000000e+000 |
| 2.200000e+001 | 0.000000e+000 |
| 2.300000e+001 | 0.000000e+000 |
| 2.400000e+001 | 0.000000e+000 |
| 2.500000e+001 | 0.000000e+000 |
| 2.600000e+001 | 0.000000e+000 |
| 2.700000e+001 | 0.000000e+000 |
| 2.800000e+001 | 5.243419e-003 |
| 2.900000e+001 | 1.250495e-001 |
| 3.000000e+001 | 2.698084e-001 |
| 3.100000e+001 | 2.556208e-001 |
| 3.200000e+001 | 1.510313e-001 |
| 3.300000e+001 | 8.054344e-002 |
| 3.400000e+001 | 5.769768e-002 |
| 3.500000e+001 | 4.150974e-002 |
| 3.600000e+001 | 1.349571e-002 |
| 3.700000e+001 | 0.000000e+000 |
| 3.800000e+001 | 0.000000e+000 |
| 3.900000e+001 | 0.000000e+000 |
| 4.000000e+001 | 0.000000e+000 |
| 4.100000e+001 | 0.000000e+000 |
| 4.200000e+001 | 0.000000e+000 |
| 4.300000e+001 | 0.000000e+000 |

|               |               |
|---------------|---------------|
| 4.400000e+001 | 0.000000e+000 |
| 4.500000e+001 | 0.000000e+000 |
| 4.600000e+001 | 0.000000e+000 |
| 4.700000e+001 | 0.000000e+000 |
| 4.800000e+001 | 0.000000e+000 |
| 4.900000e+001 | 0.000000e+000 |
| 5.000000e+001 | 0.000000e+000 |
| 5.100000e+001 | 0.000000e+000 |
| 5.200000e+001 | 0.000000e+000 |
| 5.300000e+001 | 0.000000e+000 |
| 5.400000e+001 | 0.000000e+000 |
| 5.500000e+001 | 0.000000e+000 |
| 5.600000e+001 | 0.000000e+000 |
| 5.700000e+001 | 0.000000e+000 |
| 5.800000e+001 | 0.000000e+000 |
| 5.900000e+001 | 0.000000e+000 |
| 6.000000e+001 | 0.000000e+000 |
| 85 151        |               |
| 1.000000e+000 | 0.000000e+000 |
| 2.000000e+000 | 0.000000e+000 |
| 3.000000e+000 | 0.000000e+000 |
| 4.000000e+000 | 0.000000e+000 |
| 5.000000e+000 | 0.000000e+000 |
| 6.000000e+000 | 0.000000e+000 |
| 7.000000e+000 | 0.000000e+000 |
| 8.000000e+000 | 0.000000e+000 |
| 9.000000e+000 | 0.000000e+000 |
| 1.000000e+001 | 0.000000e+000 |
| 1.100000e+001 | 0.000000e+000 |
| 1.200000e+001 | 0.000000e+000 |
| 1.300000e+001 | 0.000000e+000 |
| 1.400000e+001 | 0.000000e+000 |
| 1.500000e+001 | 0.000000e+000 |
| 1.600000e+001 | 0.000000e+000 |
| 1.700000e+001 | 0.000000e+000 |
| 1.800000e+001 | 0.000000e+000 |
| 1.900000e+001 | 0.000000e+000 |
| 2.000000e+001 | 0.000000e+000 |
| 2.100000e+001 | 0.000000e+000 |
| 2.200000e+001 | 0.000000e+000 |
| 2.300000e+001 | 0.000000e+000 |
| 2.400000e+001 | 0.000000e+000 |
| 2.500000e+001 | 0.000000e+000 |
| 2.600000e+001 | 0.000000e+000 |
| 2.700000e+001 | 0.000000e+000 |
| 2.800000e+001 | 0.000000e+000 |
| 2.900000e+001 | 0.000000e+000 |
| 3.000000e+001 | 1.107000e-003 |
| 3.100000e+001 | 4.270172e-002 |
| 3.200000e+001 | 1.687325e-001 |
| 3.300000e+001 | 3.008396e-001 |
| 3.400000e+001 | 2.997837e-001 |
| 3.500000e+001 | 1.601664e-001 |
| 3.600000e+001 | 2.666909e-002 |

|               |               |
|---------------|---------------|
| 3.700000e+001 | 0.000000e+000 |
| 3.800000e+001 | 0.000000e+000 |
| 3.900000e+001 | 0.000000e+000 |
| 4.000000e+001 | 0.000000e+000 |
| 4.100000e+001 | 0.000000e+000 |
| 4.200000e+001 | 0.000000e+000 |
| 4.300000e+001 | 0.000000e+000 |
| 4.400000e+001 | 0.000000e+000 |
| 4.500000e+001 | 0.000000e+000 |
| 4.600000e+001 | 0.000000e+000 |
| 4.700000e+001 | 0.000000e+000 |
| 4.800000e+001 | 0.000000e+000 |
| 4.900000e+001 | 0.000000e+000 |
| 5.000000e+001 | 0.000000e+000 |
| 5.100000e+001 | 0.000000e+000 |
| 5.200000e+001 | 0.000000e+000 |
| 5.300000e+001 | 0.000000e+000 |
| 5.400000e+001 | 0.000000e+000 |
| 5.500000e+001 | 0.000000e+000 |
| 5.600000e+001 | 0.000000e+000 |
| 5.700000e+001 | 0.000000e+000 |
| 5.800000e+001 | 0.000000e+000 |
| 5.900000e+001 | 0.000000e+000 |
| 6.000000e+001 | 0.000000e+000 |

93 112

|               |               |
|---------------|---------------|
| 1.000000e+000 | 0.000000e+000 |
| 2.000000e+000 | 0.000000e+000 |
| 3.000000e+000 | 0.000000e+000 |
| 4.000000e+000 | 0.000000e+000 |
| 5.000000e+000 | 0.000000e+000 |
| 6.000000e+000 | 0.000000e+000 |
| 7.000000e+000 | 0.000000e+000 |
| 8.000000e+000 | 0.000000e+000 |
| 9.000000e+000 | 0.000000e+000 |
| 1.000000e+001 | 0.000000e+000 |
| 1.100000e+001 | 0.000000e+000 |
| 1.200000e+001 | 0.000000e+000 |
| 1.300000e+001 | 0.000000e+000 |
| 1.400000e+001 | 0.000000e+000 |
| 1.500000e+001 | 0.000000e+000 |
| 1.600000e+001 | 0.000000e+000 |
| 1.700000e+001 | 0.000000e+000 |
| 1.800000e+001 | 0.000000e+000 |
| 1.900000e+001 | 0.000000e+000 |
| 2.000000e+001 | 0.000000e+000 |
| 2.100000e+001 | 0.000000e+000 |
| 2.200000e+001 | 0.000000e+000 |
| 2.300000e+001 | 0.000000e+000 |
| 2.400000e+001 | 6.543210e-002 |
| 2.500000e+001 | 2.682320e-001 |
| 2.600000e+001 | 3.836883e-001 |
| 2.700000e+001 | 1.713932e-001 |
| 2.800000e+001 | 3.534334e-002 |
| 2.900000e+001 | 3.100125e-002 |

|               |                |
|---------------|----------------|
| 3.000000e+001 | 2.196646e-002  |
| 3.100000e+001 | 1.245669e-002  |
| 3.200000e+001 | 1.048668e-002  |
| 3.300000e+001 | 0.000000e+000  |
| 3.400000e+001 | 0.000000e+000  |
| 3.500000e+001 | 0.000000e+000  |
| 3.600000e+001 | 0.000000e+000  |
| 3.700000e+001 | 0.000000e+000  |
| 3.800000e+001 | 0.000000e+000  |
| 3.900000e+001 | 0.000000e+000  |
| 4.000000e+001 | 0.000000e+000  |
| 4.100000e+001 | 0.000000e+000  |
| 4.200000e+001 | 0.000000e+000  |
| 4.300000e+001 | 0.000000e+000  |
| 4.400000e+001 | 0.000000e+000  |
| 4.500000e+001 | 0.000000e+000  |
| 4.600000e+001 | 0.000000e+000  |
| 4.700000e+001 | 0.000000e+000  |
| 4.800000e+001 | 0.000000e+000  |
| 4.900000e+001 | 0.000000e+000  |
| 5.000000e+001 | 0.000000e+000  |
| 5.100000e+001 | 0.000000e+000  |
| 5.200000e+001 | 0.000000e+000  |
| 5.300000e+001 | 0.000000e+000  |
| 5.400000e+001 | 0.000000e+000  |
| 5.500000e+001 | 0.000000e+000  |
| 5.600000e+001 | 0.000000e+000  |
| 5.700000e+001 | 0.000000e+000  |
| 5.800000e+001 | 0.000000e+000  |
| 5.900000e+001 | 0.000000e+000  |
| 6.000000e+001 | 0.000000e+000  |
| 59 159        |                |
| 1.000000e+000 | 0.000000e+000  |
| 2.000000e+000 | 0.000000e+000  |
| 3.000000e+000 | 0.000000e+000  |
| 4.000000e+000 | 0.000000e+000  |
| 5.000000e+000 | 0.000000e+000  |
| 6.000000e+000 | 0.000000e+000  |
| 7.000000e+000 | 0.000000e+000  |
| 8.000000e+000 | 0.000000e+000  |
| 9.000000e+000 | 0.000000e+000  |
| 1.000000e+001 | 0.000000e+000  |
| 1.100000e+001 | 0.000000e+000  |
| 1.200000e+001 | 0.000000e+000  |
| 1.300000e+001 | 0.000000e+000  |
| 1.400000e+001 | 0.000000e+000  |
| 1.500000e+001 | 0.000000e+000  |
| 1.600000e+001 | 0.000000e+000  |
| 1.700000e+001 | 0.000000e+000  |
| 1.800000e+001 | 0.000000e+000  |
| 1.900000e+001 | 0.000000e+000  |
| 2.000000e+001 | 6.0289383e-006 |
| 2.100000e+001 | 4.6472170e-004 |
| 2.200000e+001 | 1.5475842e-003 |



|               |                |
|---------------|----------------|
| 2.300000e+001 | 2.5934813e-003 |
| 2.400000e+001 | 2.9068231e-003 |
| 2.500000e+001 | 2.4031827e-003 |
| 2.600000e+001 | 1.6769979e-003 |
| 2.700000e+001 | 1.3590148e-003 |
| 2.800000e+001 | 1.6277066e-003 |
| 2.900000e+001 | 1.7528507e-003 |
| 3.000000e+001 | 1.2425983e-003 |
| 3.100000e+001 | 3.3584783e-004 |
| 3.200000e+001 | 3.7165028e-005 |
| 3.300000e+001 | 2.4745102e-003 |
| 3.400000e+001 | 9.8288484e-003 |
| 3.500000e+001 | 2.1895819e-002 |
| 3.600000e+001 | 3.6041975e-002 |
| 3.700000e+001 | 5.1018392e-002 |
| 3.800000e+001 | 6.7437971e-002 |
| 3.900000e+001 | 8.5431164e-002 |
| 4.000000e+001 | 1.0272809e-001 |
| 4.100000e+001 | 1.1526669e-001 |
| 4.200000e+001 | 1.1893905e-001 |
| 4.300000e+001 | 1.1180355e-001 |
| 4.400000e+001 | 9.4988937e-002 |
| 4.500000e+001 | 7.1614840e-002 |
| 4.600000e+001 | 4.6911763e-002 |
| 4.700000e+001 | 2.5592633e-002 |
| 4.800000e+001 | 1.0569208e-002 |
| 4.900000e+001 | 2.4851081e-003 |
| 5.000000e+001 | 9.3424617e-005 |
| 5.100000e+001 | 6.8867490e-004 |
| 5.200000e+001 | 1.9279936e-003 |
| 5.300000e+001 | 2.2893815e-003 |
| 5.400000e+001 | 1.5416330e-003 |
| 5.500000e+001 | 4.7633955e-004 |
| 5.600000e+001 | 0.0000000e+000 |
| 5.700000e+001 | 0.0000000e+000 |
| 5.800000e+001 | 0.0000000e+000 |
| 5.900000e+001 | 0.0000000e+000 |
| 6.000000e+001 | 0.0000000e+000 |

## References and Notes

- (1) Borbat, P. P.; Mchaourab, H. S.; Freed, J. H. *J. Am. Chem. Soc.* 2002, *124*, 5304.
- (2) Alexander, N.; Bortolus, M.; Al-Mestarihi, A.; Mchaourab, H.; Meilerl, J. *Structure* 2008, *16*, 181.
- (3) Kazmier, K.; Alexander, N. S.; Meiler, J.; Mchaourab, H. S. *J. Struct. Biol.* 2011, *173*, 549.
- (4) Weaver, L. H.; Matthews, B. W. *J. Mol. Biol.* 1987, *193*, 189.
